# Supplementary material for: Multi-isotope evidence for the emergence of cultural alterity in Late Neolithic Europe
Source: PubMed Central journal article supplement — Sci Adv. 2020 Jan 22;6(4):eaay2169. doi: 10.1126/sciadv.aay2169 (PMC6976287; doi:10.1126/sciadv.aay2169), 2020-01-22
Supplement: aay2169_SM.pdf [file aay2169_SM.pdf]

## Supplementary Materials for

### Multi-isotope evidence for the emergence of cultural alterity in Late Neolithic Europe

T. Fernández-Crespo\*, C. Snoeck, J. Ordoño, N. J. de Winter, A. Czermak, N. Mattielli, J. A. Lee-Thorp, R. J. Schulting

\*Corresponding author. Email: teresa.fernandez-crespo@arch.ox.ac.uk

Published 22 January 2020, *Sci. Adv.* **6**, eaay2169 (2020)  
DOI: 10.1126/sciadv.aay2169

#### This PDF file includes:

Fig. S1. Density distribution of dentine collagen carbon ( $\delta^{13}\text{C}_{\text{dcol}}$ ) isotope values, by site type and by sex and site type.

Fig. S2. Summary graph of dentine collagen nitrogen ( $\delta^{15}\text{N}_{\text{dcol}}$ ) and carbon ( $\delta^{13}\text{C}_{\text{dcol}}$ ) isotope values, enamel carbonate oxygen ( $\delta^{18}\text{O}_{\text{c}}$ ) isotope values, enamel apatite carbon ( $\delta^{13}\text{C}_{\text{ap}}$ ) and strontium ( $^{87}\text{Sr}/^{86}\text{Sr}$ ) isotope values, and strontium ([Sr]) and calcium ([Ca]) concentrations for the 32 individuals analyzed in the study.

Fig. S3. Dispersion of  $\delta^{13}\text{C}_{\text{dcol}}$  and  $\delta^{13}\text{C}_{\text{ap}}$   $\Delta\text{M1-M2}$  values for the 27 individuals selected for a life history approach.

Fig. S4. Dispersion of M1 and M2  $\Delta^{13}\text{C}_{\text{dcol-ap}}$  values for the 27 individuals selected for a life history approach.

Fig. S5. Correlation between latitude and both M1 and M2 enamel carbonate ( $\delta^{18}\text{O}_{\text{c}}$ ) and modern water ( $\delta^{18}\text{O}_{\text{dw}}$ ) oxygen isotope values.

Fig. S6. Dispersion of enamel carbonate oxygen isotope values ( $\delta^{18}\text{O}_{\text{c}}$ ) by site type and by sex and site type.

Fig. S7. Dispersion of strontium isotope values ( $^{87}\text{Sr}/^{86}\text{Sr}$ ) by site type and by sex and site type.

Fig. S8. Map with the geological formations of the Rioja Alavesa region and surrounding areas, with reference to the locations where modern plant, salt, and water samples were obtained.

Fig. S9. Strontium isotope ratios ( $^{87}\text{Sr}/^{86}\text{Sr}$ ) for the individuals analyzed compared to the average BASr values for their burial sites and 15-, 30-, 60-, and 120-min walk distance catchments around these.

Fig. S10. Dispersion of [Sr](ppm)/[Ca](%) ratios by site type and by sex and site type.

Fig. S11. Correlation between M2s' [Sr] values and (i) dentine collagen carbon isotope values ( $\delta^{13}\text{C}_{\text{dcol}}$ ), (ii) dentine collagen nitrogen isotope values ( $\delta^{15}\text{N}_{\text{dcol}}$ ), (iii) enamel apatite carbon isotope values ( $\delta^{13}\text{C}_{\text{ap}}$ ), and (iv) enamel carbonate oxygen isotope values ( $\delta^{18}\text{O}_{\text{c}}$ ).

Fig. S12.  $\delta^{13}\text{C}_{\text{dcol}}$  (open purple squares) and  $\delta^{15}\text{N}_{\text{dcol}}$  (open orange triangles) isotope profiles of the M1 and M2 of the eight individuals showing clear dips around ages 9 to 11.

Table S1. Sequential dentine collagen carbon ( $\delta^{13}\text{C}_{\text{dcol}}$ ) and nitrogen ( $\delta^{15}\text{N}_{\text{dcol}}$ ) isotope values from the 27 individuals selected for the early life history approach.

Table S2. Comparison between cave and megalithic grave dentine collagen carbon ( $\delta^{13}\text{C}_{\text{dcol}}$ ) and nitrogen ( $\delta^{15}\text{N}_{\text{dcol}}$ ) isotope values.

Table S3. Comparison between cave and megalithic male and female dentine collagen carbon isotope values ( $\delta^{13}\text{C}_{\text{dcol}}$ ).

Table S4. Estimated duration of exclusive breastfeeding and weaning process, age at complete weaning, and preweaning and postweaning dentine collagen nitrogen isotope values ( $\delta^{15}\text{N}_{\text{dcol}}$ ) for the 27 individuals selected for the early life history approach.

Table S5. Summary table of adult bone collagen carbon ( $\delta^{13}\text{C}_{\text{bcol}}$ ) and nitrogen ( $\delta^{15}\text{N}_{\text{bcol}}$ ) isotope values, dentine collagen carbon ( $\delta^{13}\text{C}_{\text{dcol}}$ ) and nitrogen ( $\delta^{15}\text{N}_{\text{dcol}}$ ) isotope values (mean), enamel carbonate oxygen isotope values ( $\delta^{18}\text{O}_{\text{c}}$ ), and enamel apatite carbon ( $\delta^{13}\text{C}_{\text{ap}}$ ) and strontium ( $^{87}\text{Sr}/^{86}\text{Sr}$ ) isotope, and strontium ([Sr]) and calcium concentration ([Ca]) values for the 32 individuals analyzed in the study.

Table S6. Comparison between M1 and M2 crowns' dentine collagen ( $\delta^{13}\text{C}_{\text{col}}$ ) and enamel apatite ( $\delta^{13}\text{C}_{\text{ap}}$ ) carbon isotope values, including  $\Delta$  calculation, by site and burial location.

Table S7. Modern stream and lake water oxygen isotope values ( $\delta^{18}\text{O}_{\text{dw}}$ ) from the Rioja Alavesa region.

Table S8. Modern plant samples analyzed for the creation of the BASr map of the Rioja Alavesa region and strontium isotope ( $^{87}\text{Sr}/^{86}\text{Sr}$ ) and strontium ([Sr]) and calcium concentration ([Ca]) values obtained from them.

Table S9. BASr ( $^{87}\text{Sr}/^{86}\text{Sr} \pm 1 \text{ SD}$ ) for the local area ("local BASr") and the average BASr values calculated for 15-, 30-, 60-, and 120-min walking distance catchments.

Table S10. Correspondence between the enamel apatite strontium isotope values ( $^{87}\text{Sr}/^{86}\text{Sr}$ ) of the 32 individuals analyzed and the average BASr values calculated for the 0- to 60-min, 60- to 120-min, and >120-min walking areas from their respective burial locations.

Table S11. Strontium isotope ( $^{87}\text{Sr}/^{86}\text{Sr}$ ) and strontium ([Sr]) and calcium concentration ([Ca]) values of salt and both spring and surface salt waters from the Rioja Alavesa region.

## SUPPLEMENTARY FIGURES

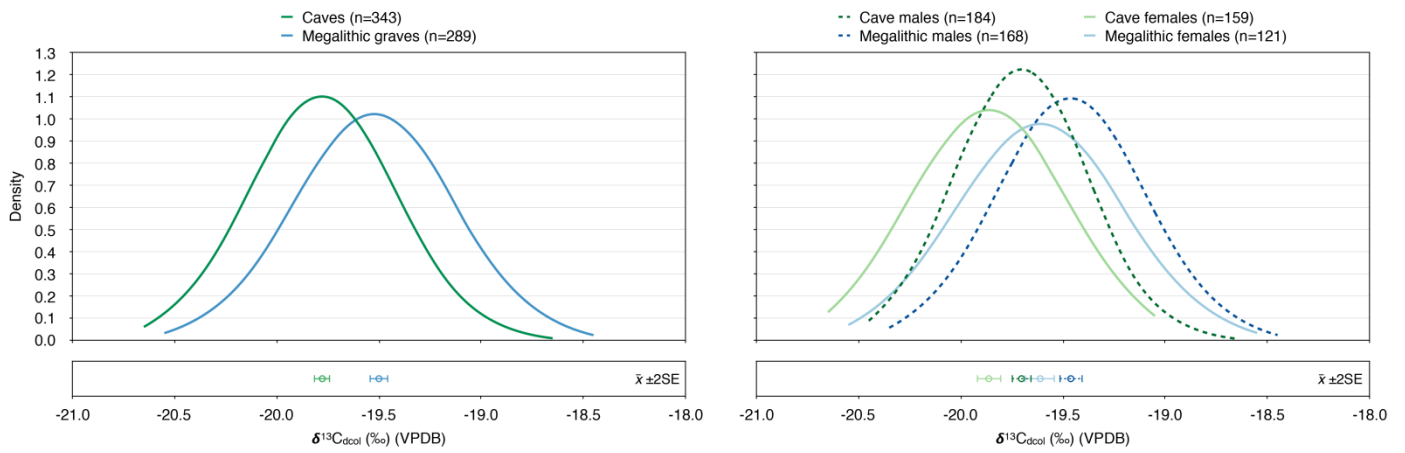

**Fig. S1.** Density distribution of dentine collagen carbon ( $\delta^{13}\text{C}_{\text{dcol}}$ ) isotope values, by site type (left) and by sex and site type (right).

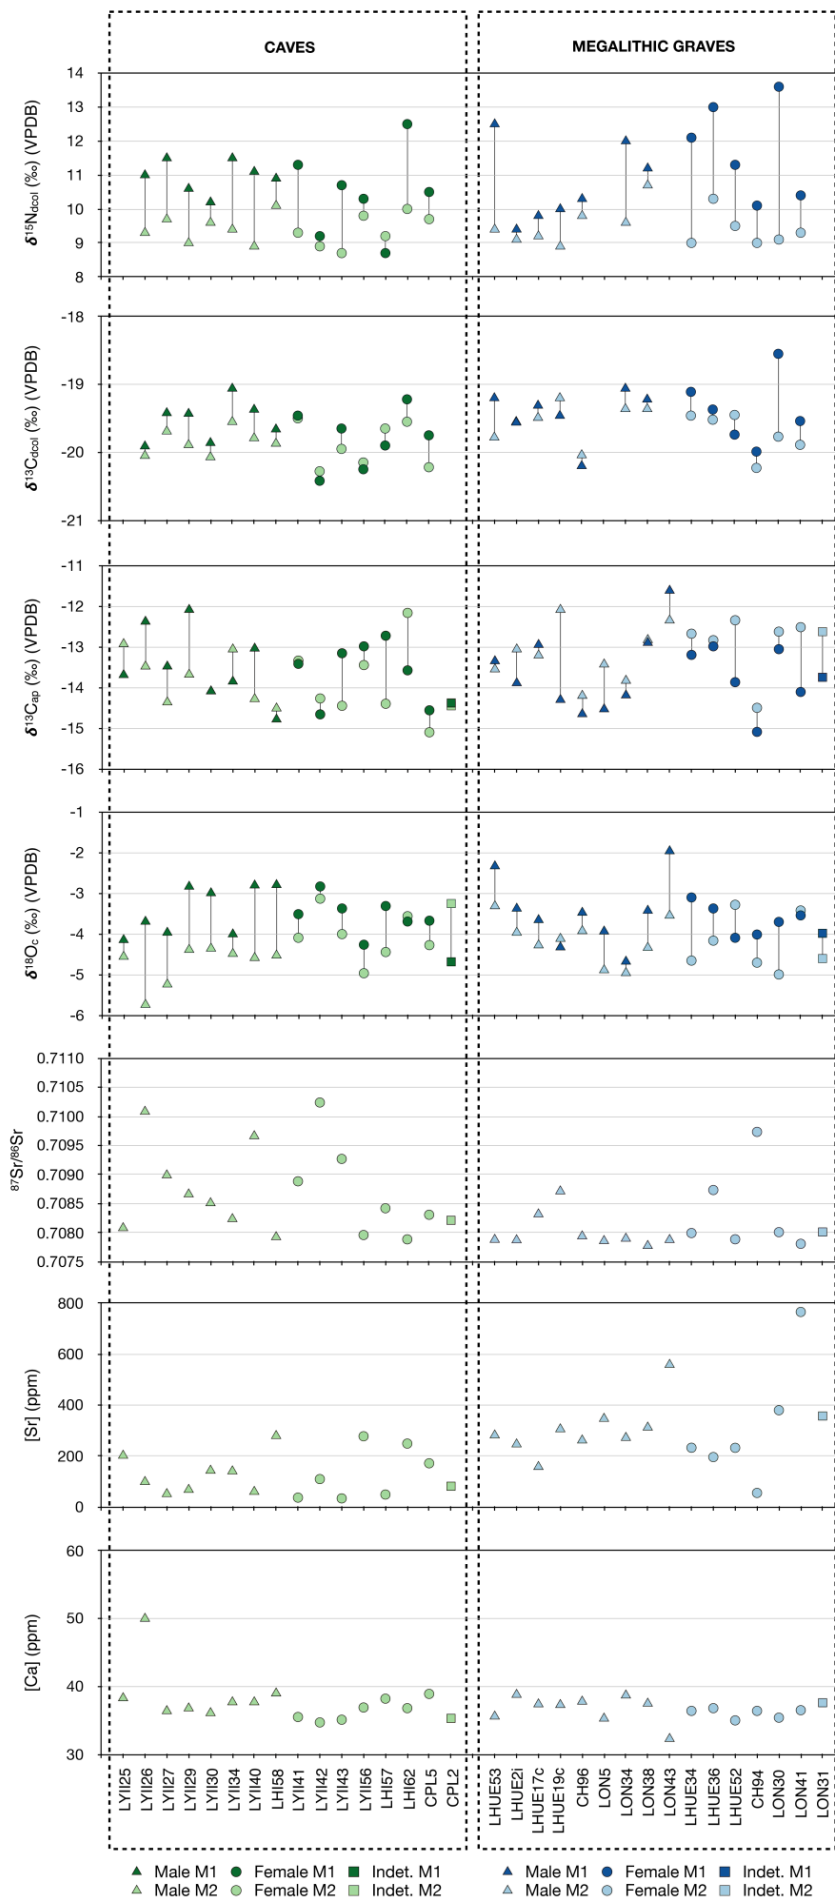

**Fig. S2. Summary graph of dentine collagen nitrogen ( $\delta^{15}\text{N}_{\text{dcol}}$ ) and carbon ( $\delta^{13}\text{C}_{\text{dcol}}$ ) isotope values, enamel carbonate oxygen ( $\delta^{18}\text{O}_{\text{c}}$ ) isotope values, enamel apatite carbon ( $\delta^{13}\text{C}_{\text{ap}}$ ) and strontium ( $^{87}\text{Sr}/^{86}\text{Sr}$ ) isotope values, and strontium ([Sr]) and calcium ([Ca]) concentrations for the 32 individuals analyzed in the study.  $\delta^{15}\text{N}_{\text{dcol}}$  and  $\delta^{13}\text{C}_{\text{dcol}}$  data represent the mean of the dentine collagen nitrogen and carbon isotope values corresponding to formation ages of M1 (0-3 years) and M2 crowns (2.5-8 years) (34), respectively (cf. Table S5).**

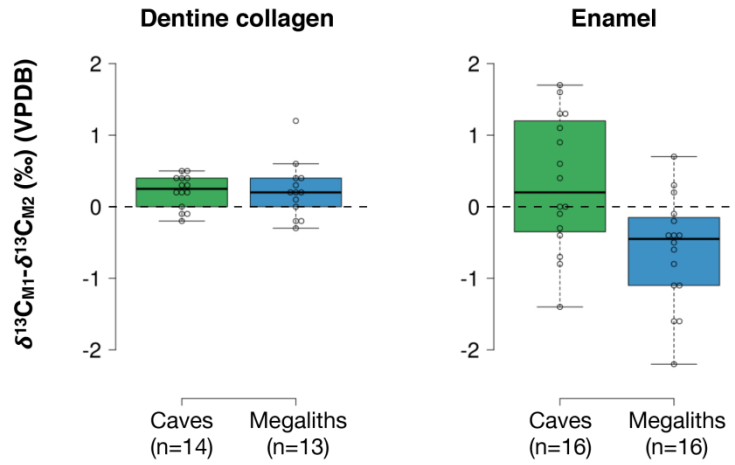

**Fig. S3.** Dispersion of  $\delta^{13}\text{C}_{\text{dcol}}$  (left) and  $\delta^{13}\text{C}_{\text{ap}}$  (right)  $\Delta\text{M1-M2}$  values for the 27 individuals selected for a life history approach.  $\delta^{13}\text{C}_{\text{dcol}}$  data used for the  $\Delta$  calculation are the mean of the dentine collagen carbon isotope values corresponding to formation ages of M1 (0-3 years) and M2 crowns (2.5-8 years) (34), respectively (cf. Table S5).

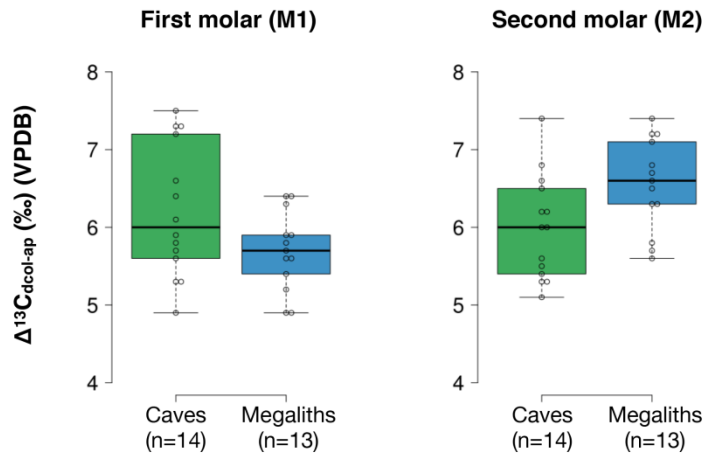

**Fig. S4.** Dispersion of M1 (left) and M2 (right)  $\Delta^{13}\text{C}_{\text{dcol-ap}}$  values for the 27 individuals selected for a life history approach.  $\delta^{13}\text{C}_{\text{dcol}}$  data used for the  $\Delta$  calculation are the mean of the dentine collagen carbon isotope values corresponding to formation ages of M1 (0-3 years) and M2 crowns (2.5-8 years) (34), respectively (cf. Table S5).

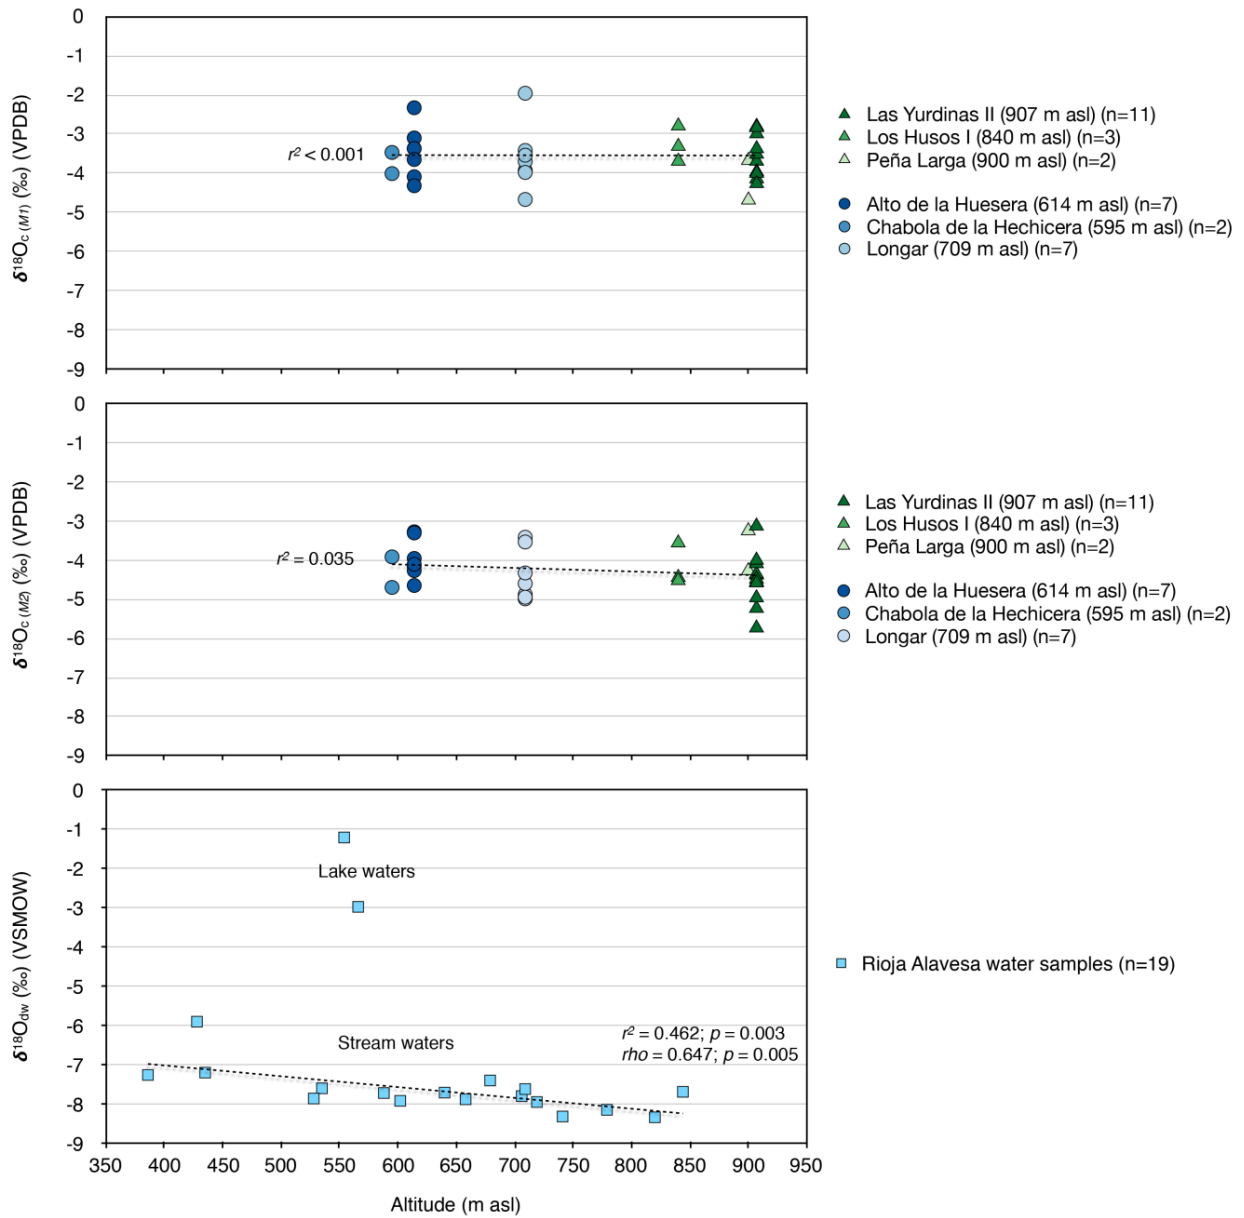

Fig. S5. Correlation between altitude and both M1 (top) and M2 (middle) enamel carbonate ( $\delta^{18}\text{O}_c$ ) and modern water ( $\delta^{18}\text{O}_{dw}$ ) (bottom) oxygen isotope values.

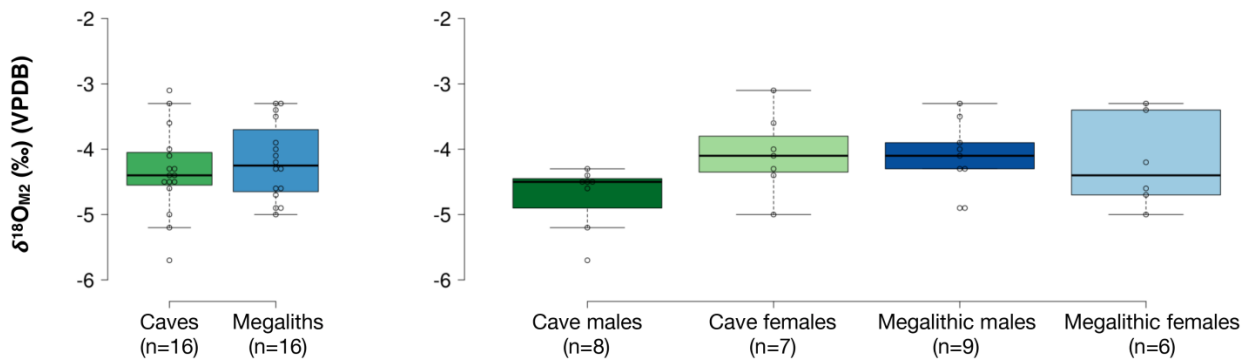

Fig. S6. Dispersion of enamel carbonate oxygen isotope values ( $\delta^{18}\text{O}_c$ ) by site type (left) and by sex and site type (right).

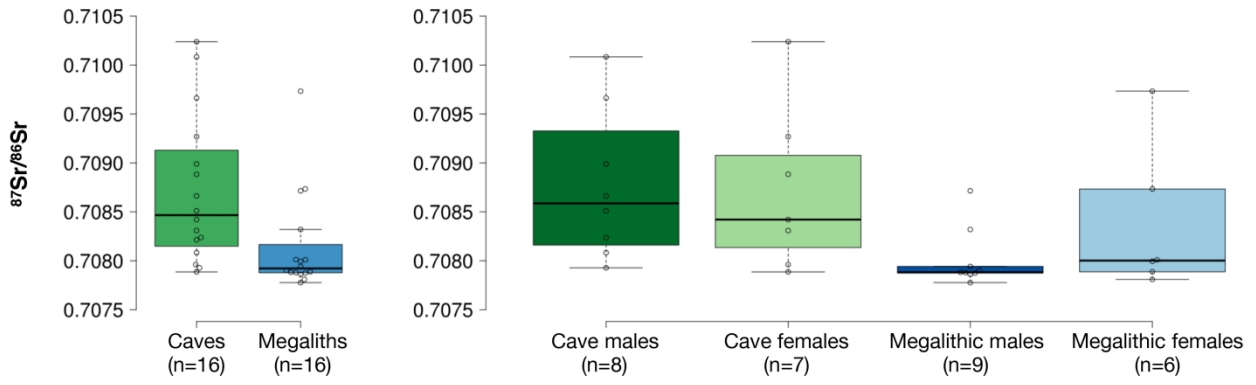

Fig. S7. Dispersion of strontium isotope values ( $^{87}\text{Sr}/^{86}\text{Sr}$ ) by site type (left) and by sex and site type (right).

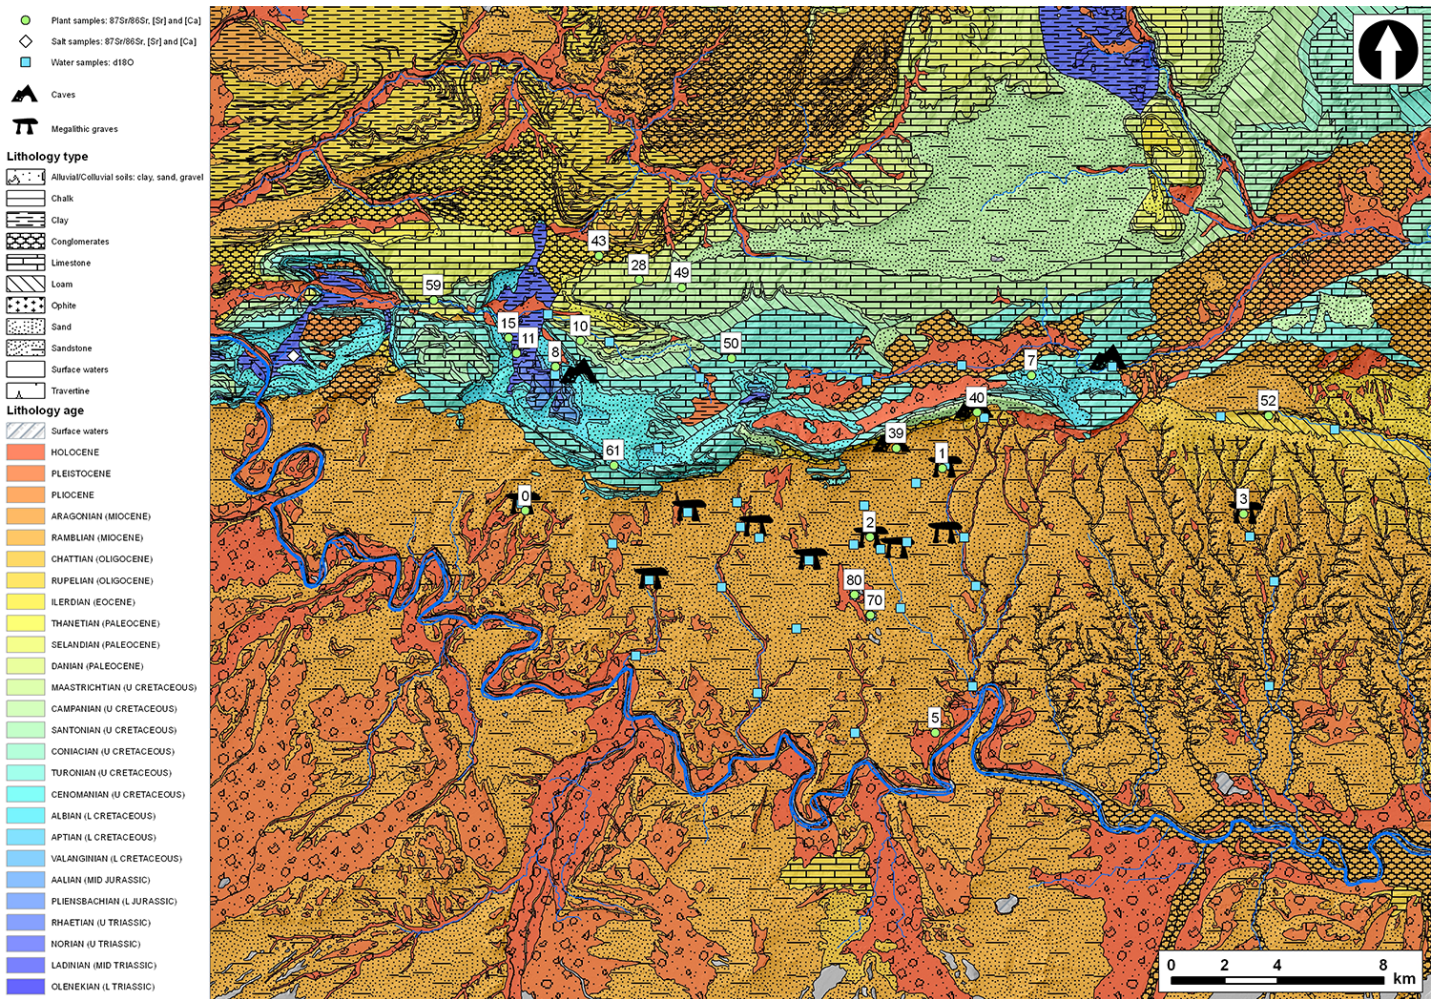

Fig. S8. Map with the geological formations of the Rioja Alavesa region and surrounding areas, with reference to the locations where modern plant, salt, and water samples were obtained.

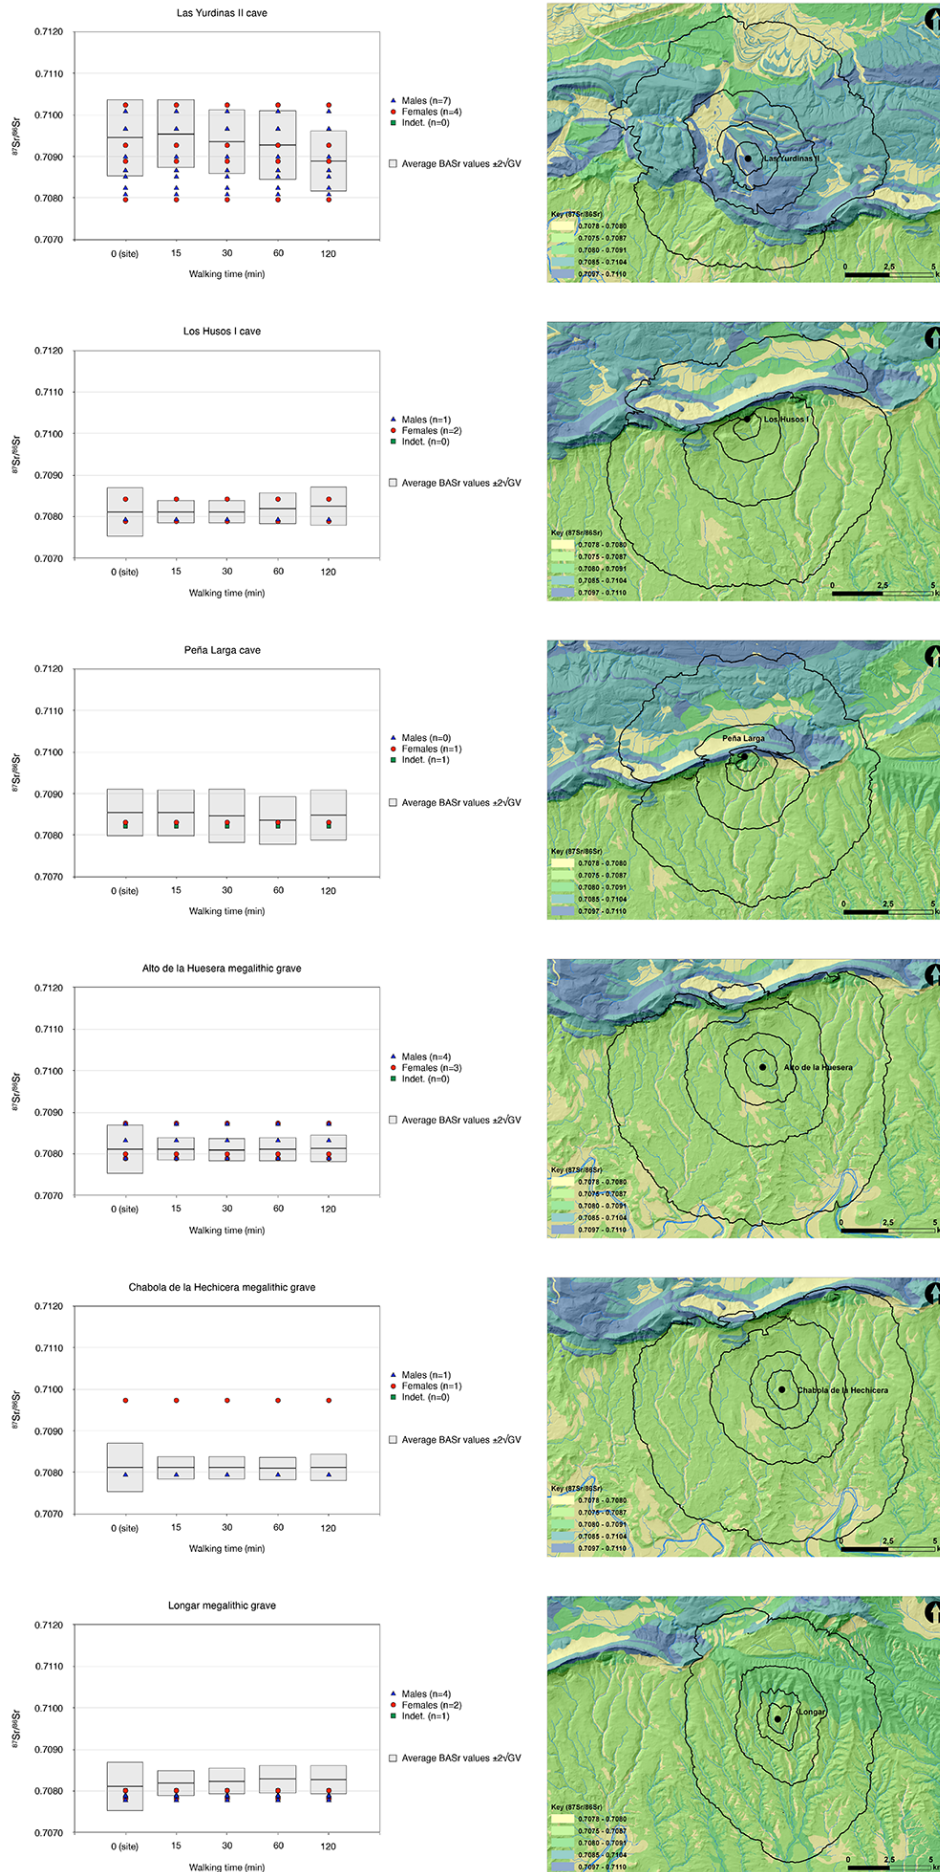

**Fig. S9. Strontium isotope ratios ( $^{87}\text{Sr}/^{86}\text{Sr}$ ) for the individuals analyzed compared to the average BASr values for their burial sites and 15-, 30-, 60-, and 120-min walk distance catchments around these. BASr values are represented by gray shaded areas, where dispersion is expressed as  $\pm 2$  pooled standard deviations or  $\sqrt{GV}$ . The catchments around each site are mapped to the right.**



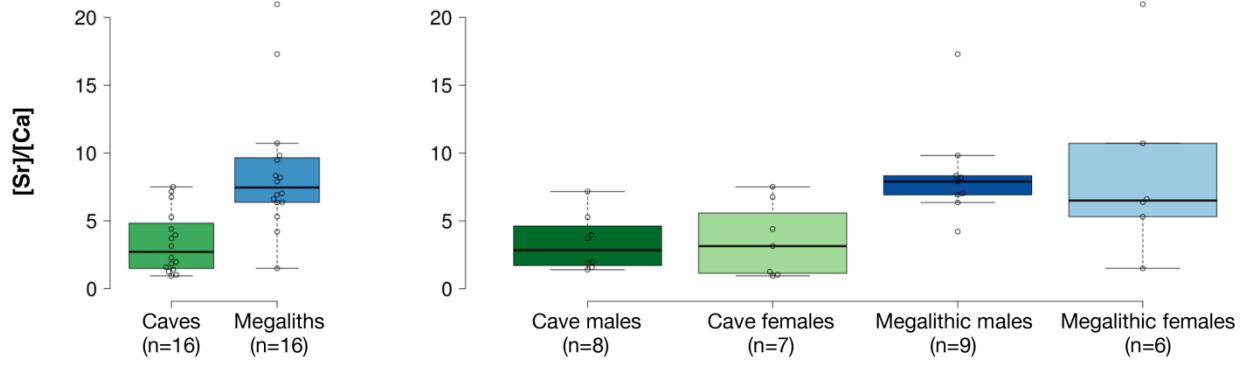

Fig. S10. Dispersion of [Sr](ppm)/[Ca](%) ratios by site type (left) and by sex and site type (right).

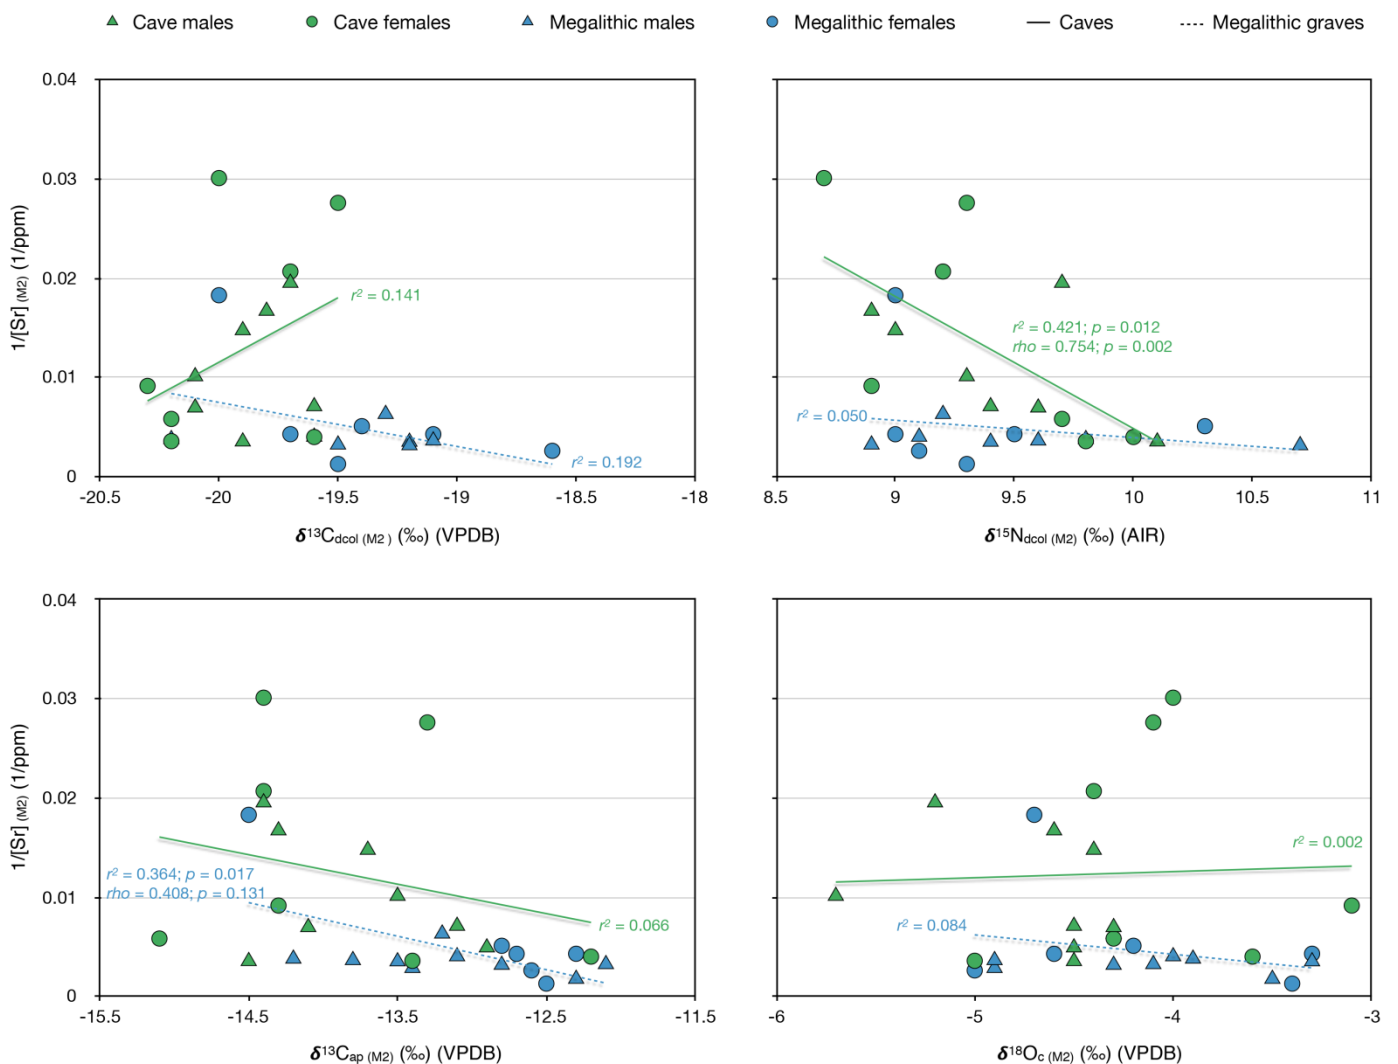

Fig. S11. Correlation between M2s' [Sr] values and (i) dentine collagen carbon isotope values ( $\delta^{13}\text{C}_{\text{dcol}}$ ), (ii) dentine collagen nitrogen isotope values ( $\delta^{15}\text{N}_{\text{dcol}}$ ), (iii) enamel apatite carbon isotope values ( $\delta^{13}\text{C}_{\text{ap}}$ ), and (iv) enamel carbonate oxygen isotope values ( $\delta^{18}\text{O}_{\text{c}}$ ).  $\delta^{13}\text{C}_{\text{dcol}}$  and  $\delta^{15}\text{N}_{\text{dcol}}$  data represent the mean of the dentine collagen carbon and nitrogen isotope values corresponding to formation ages of M2 crown (2.5-8 years) (34) (cf. Table S5).

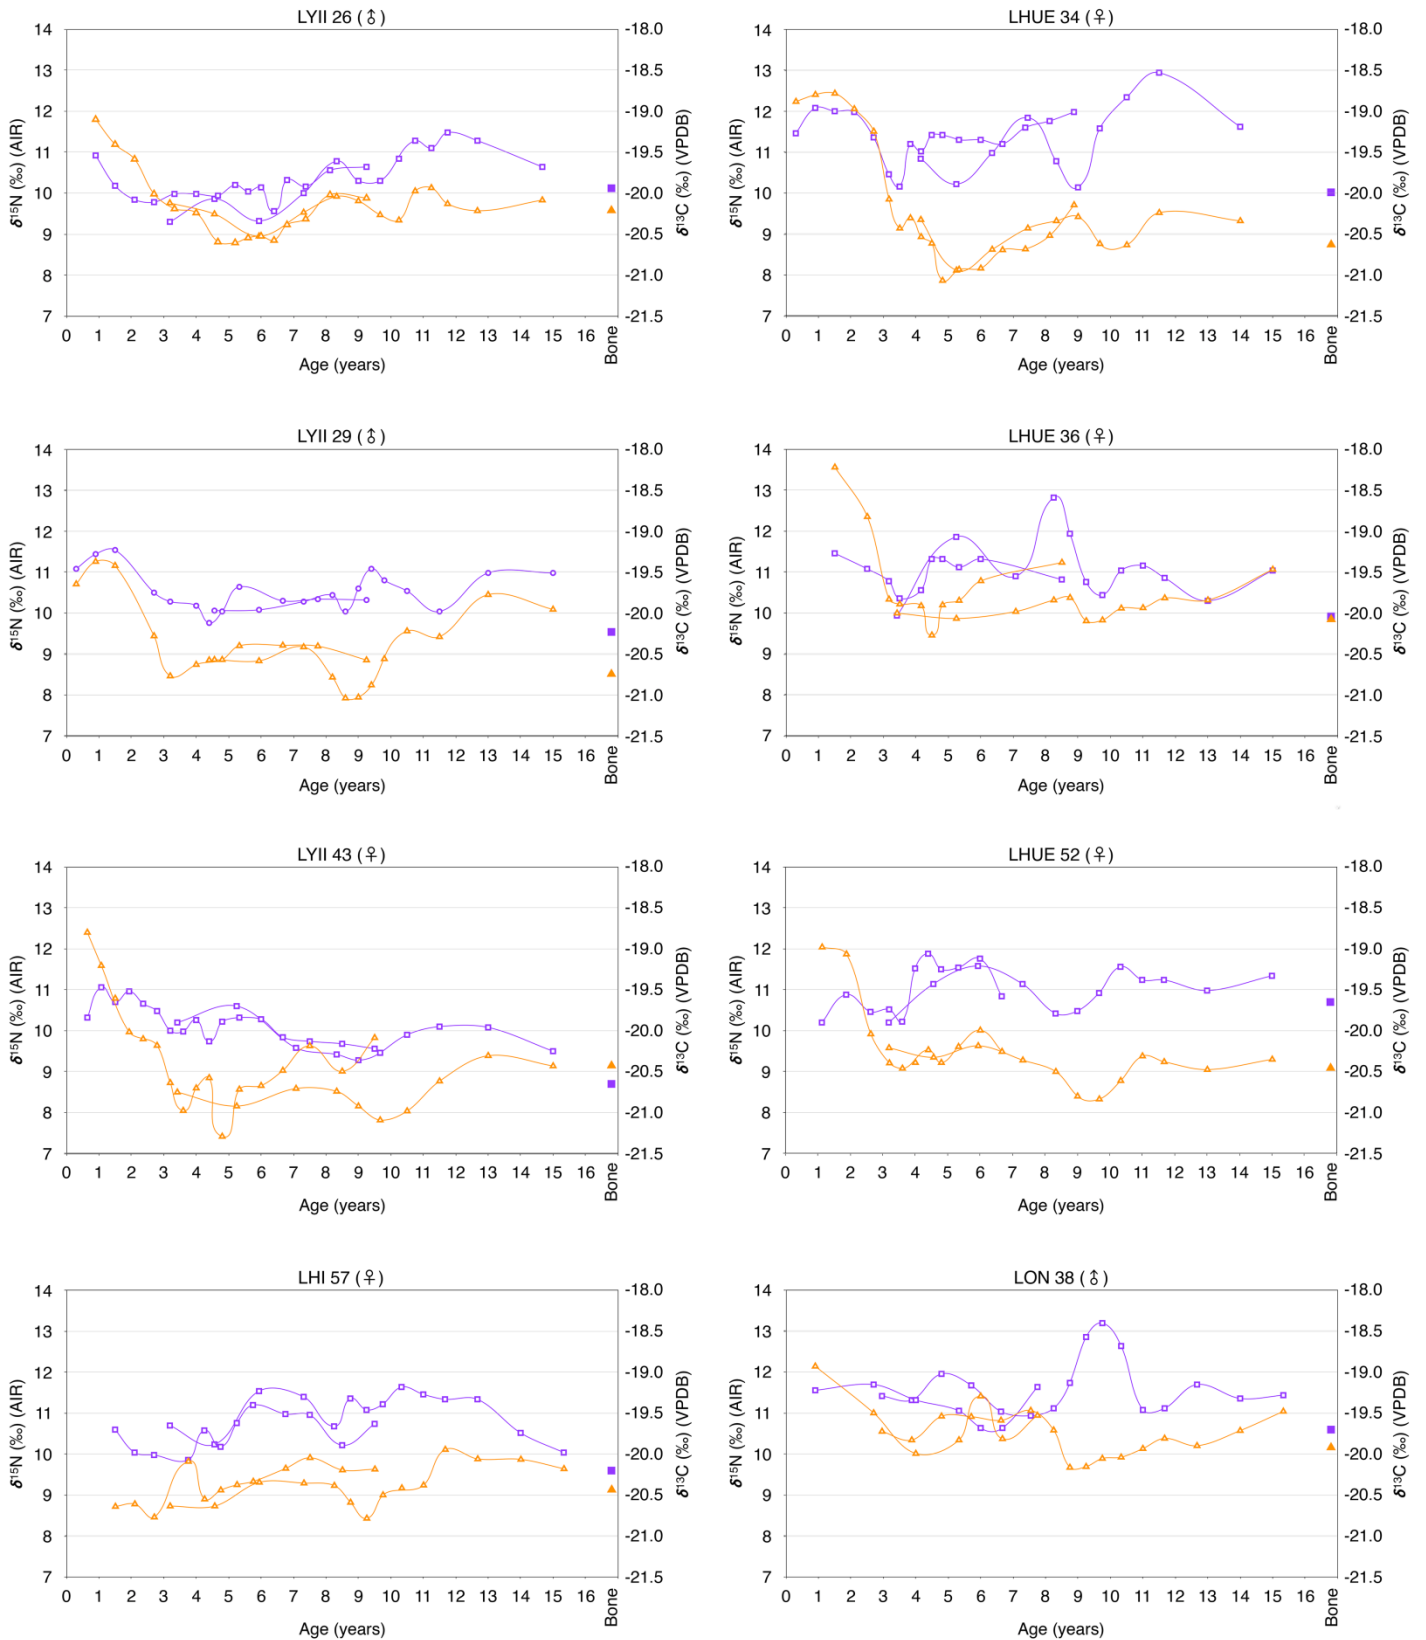

**Fig. S12.**  $\delta^{13}\text{C}_{\text{dcol}}$  (open purple squares) and  $\delta^{15}\text{N}_{\text{dcol}}$  (open orange triangles) isotope profiles of the M1 and M2 of the eight individuals showing clear dips around ages 9 to 11. Values obtained on the bone collagen ( $\delta^{13}\text{C}_{\text{bcoll}}$  and  $\delta^{15}\text{N}_{\text{bcoll}}$ ) of the same individuals at adulthood (18) are shown for reference (solid markers to the right).

**SUPPLEMENTARY TABLES**

| Table S1. Sequential dentine collagen carbon ( $\delta^{13}\text{C}_{\text{dcol}}$ ) and nitrogen ( $\delta^{15}\text{N}_{\text{dcol}}$ ) isotope values from the 27 individuals selected for the early life history approach. |                 |                       |      |            |       |                       |         |      |      |      |                                                |                                               |
|--------------------------------------------------------------------------------------------------------------------------------------------------------------------------------------------------------------------------------|-----------------|-----------------------|------|------------|-------|-----------------------|---------|------|------|------|------------------------------------------------|-----------------------------------------------|
| Site                                                                                                                                                                                                                           | Individual      | Age at death (years)* | Sex* | Id. number | Tooth | Age estimated (years) | Weight† | %C†  | %N†  | C:N† | $\delta^{13}\text{C}_{\text{dcol}}$ (‰) (VPDB) | $\delta^{15}\text{N}_{\text{dcol}}$ (‰) (AIR) |
| 1. Las Yurdinas II                                                                                                                                                                                                             | LYII.A.10.15065 | 30-35                 | M    | LYII26_1   | M1    | 0.90                  | 0.8     | 45.3 | 16.4 | 3.2  | -19.5                                          | 11.8                                          |
|                                                                                                                                                                                                                                |                 |                       |      | LYII26_2   | M1    | 1.50                  | 1.0     | 45.3 | 16.5 | 3.2  | -19.9                                          | 11.2                                          |
|                                                                                                                                                                                                                                |                 |                       |      | LYII26_3   | M1    | 2.10                  | 1.2     | 45.1 | 16.5 | 3.2  | -20.1                                          | 10.8                                          |
|                                                                                                                                                                                                                                |                 |                       |      | LYII26_4   | M1    | 2.70                  | 1.1     | 41.9 | 15.3 | 3.2  | -20.1                                          | 10.0                                          |
|                                                                                                                                                                                                                                |                 |                       |      | LYII26_5   | M1    | 3.33                  | 0.9     | 44.9 | 16.2 | 3.2  | -20.0                                          | 9.6                                           |
|                                                                                                                                                                                                                                |                 |                       |      | LYII26_6   | M1    | 4.00                  | 1.0     | 43.5 | 15.8 | 3.2  | -20.0                                          | 9.5                                           |
|                                                                                                                                                                                                                                |                 |                       |      | LYII26_7   | M1    | 4.67                  | 0.8     | 43.7 | 15.8 | 3.2  | -20.0                                          | 8.8                                           |
|                                                                                                                                                                                                                                |                 |                       |      | LYII26_8   | M1    | 5.20                  | 0.9     | 43.9 | 15.9 | 3.2  | -19.9                                          | 8.8                                           |
|                                                                                                                                                                                                                                |                 |                       |      | LYII26_9   | M1    | 5.60                  | 0.9     | 44.0 | 15.9 | 3.2  | -20.0                                          | 8.9                                           |
|                                                                                                                                                                                                                                |                 |                       |      | LYII26_10  | M1    | 6.00                  | 0.8     | 44.2 | 15.9 | 3.2  | -19.9                                          | 9.0                                           |
|                                                                                                                                                                                                                                |                 |                       |      | LYII26_11  | M1    | 6.40                  | 0.7     | 43.3 | 15.5 | 3.3  | -20.2                                          | 8.9                                           |
|                                                                                                                                                                                                                                |                 |                       |      | LYII26_12  | M1    | 6.80                  | 0.9     | 45.9 | 16.6 | 3.2  | -19.8                                          | 9.2                                           |
|                                                                                                                                                                                                                                |                 |                       |      | LYII26_13  | M1    | 7.38                  | 0.7     | 44.1 | 15.8 | 3.2  | -19.9                                          | 9.4                                           |
|                                                                                                                                                                                                                                |                 |                       |      | LYII26_14  | M1    | 8.13                  | 0.6     | 46.8 | 16.8 | 3.2  | -19.7                                          | 10.0                                          |
|                                                                                                                                                                                                                                |                 |                       |      | LYII26_15  | M1    | 9.25                  | 0.8     | 44.2 | 15.9 | 3.3  | -19.7                                          | 9.9                                           |
|                                                                                                                                                                                                                                |                 |                       |      | LYII26_16  | M2    | 3.19                  | 0.8     | 45.8 | 16.6 | 3.2  | -20.3                                          | 9.8                                           |
|                                                                                                                                                                                                                                |                 |                       |      | LYII26_17  | M2    | 4.56                  | 1.1     | 47.1 | 17.2 | 3.2  | -20.1                                          | 9.5                                           |
|                                                                                                                                                                                                                                |                 |                       |      | LYII26_18  | M2    | 5.94                  | 1.0     | 43.8 | 15.9 | 3.2  | -20.3                                          | 8.9                                           |
|                                                                                                                                                                                                                                |                 |                       |      | LYII26_19  | M2    | 7.31                  | 1.2     | 45.2 | 16.4 | 3.2  | -20.0                                          | 9.5                                           |
|                                                                                                                                                                                                                                |                 |                       |      | LYII26_20  | M2    | 8.33                  | 1.2     | 44.7 | 16.3 | 3.2  | -19.6                                          | 9.9                                           |

|                    |                 |       |     |           |      |       |       |      |      |     |       |      |
|--------------------|-----------------|-------|-----|-----------|------|-------|-------|------|------|-----|-------|------|
|                    |                 |       |     | LYII26_21 | M2   | 9.00  | 1.2   | 42.7 | 15.5 | 3.2 | -19.9 | 9.8  |
|                    |                 |       |     | LYII26_22 | M2   | 9.67  | 1.0   | 43.3 | 15.7 | 3.2 | -19.9 | 9.5  |
|                    |                 |       |     | LYII26_23 | M2   | 10.25 | 1.1   | 44.3 | 16.0 | 3.2 | -19.6 | 9.3  |
|                    |                 |       |     | LYII26_24 | M2   | 10.75 | 0.6   | 40.5 | 14.5 | 3.2 | -19.4 | 10.1 |
|                    |                 |       |     | LYII26_25 | M2   | 11.25 | 0.6   | 41.0 | 14.7 | 3.2 | -19.5 | 10.1 |
|                    |                 |       |     | LYII26_26 | M2   | 11.75 | 0.6   | 47.3 | 17.0 | 3.2 | -19.3 | 9.7  |
|                    |                 |       |     | LYII26_27 | M2   | 12.67 | 0.6   | 45.0 | 16.3 | 3.2 | -19.4 | 9.6  |
|                    |                 |       |     | LYII26_28 | M2   | 14.67 | 0.8   | 43.0 | 15.4 | 3.3 | -19.7 | 9.8  |
| 1. Las Yurdinas II | LYII.A.10.15080 | 30-40 | M   | LYII27_1  | M1   | 0.90  | 1.0   | 42.5 | 15.3 | 3.2 | -19.4 | 13.1 |
|                    |                 |       |     | LYII27_2  | M1   | 1.50  | 0.8   | 52.4 | 18.9 | 3.2 | -19.4 | 12.6 |
|                    |                 |       |     | LYII27_3  | M1   | 2.10  | 1.2   | 45.6 | 16.5 | 3.2 | -19.4 | 10.5 |
|                    |                 |       |     | LYII27_4  | M1   | 2.70  | 1.2   | 44.9 | 16.2 | 3.2 | -19.5 | 10.0 |
|                    |                 |       |     | LYII27_5  | M1   | 3.25  | 1.1   | 45.6 | 16.4 | 3.2 | -20.0 | 9.8  |
|                    |                 |       |     | LYII27_6  | M1   | 3.75  | 1.0   | 44.8 | 16.1 | 3.2 | -19.9 | 9.2  |
|                    |                 |       |     | LYII27_7  | M1   | 4.25  | 1.2   | 43.4 | 15.6 | 3.2 | -19.6 | 10.2 |
|                    |                 |       |     | LYII27_8  | M1   | 4.75  | 1.2   | 43.5 | 15.7 | 3.2 | -19.6 | 9.5  |
|                    |                 |       |     | LYII27_9  | M1   | 5.25  | 1.2   | 44.1 | 16.0 | 3.2 | -19.6 | 9.3  |
|                    |                 |       |     | LYII27_10 | M1   | 5.75  | 0.8   | 41.8 | 14.9 | 3.3 | -19.6 | 9.4  |
|                    |                 |       |     | LYII27_11 | M1   | 6.25  | 0.6   | 44.3 | 15.5 | 3.3 | -19.7 | 10.3 |
|                    |                 |       |     | LYII27_12 | M1   | 6.75  | 1.1   | 41.9 | 15.1 | 3.2 | -19.7 | 9.9  |
|                    |                 |       |     | LYII27_13 | M1   | 7.38  | 1.2   | 45.8 | 16.5 | 3.2 | -19.4 | 10.2 |
|                    |                 |       |     | LYII27_14 | M1   | 8.13  | 1.0   | 44.7 | 15.9 | 3.3 | -19.6 | 10.0 |
|                    |                 |       |     | LYII27_15 | M1   | 8.88  | 0.7   | 43.2 | 15.3 | 3.3 | -19.9 | 10.1 |
| LYII27_16          | M1              | 9.63  | 0.7 | 44.0      | 15.7 | 3.3   | -19.8 | 9.9  |      |     |       |      |
| LYII27_17          | M2              | 3.05  | 1.2 | 42.8      | 15.5 | 3.2   | -20.0 | 10.1 |      |     |       |      |

|                    |                 |       |   |                 |           |             |            |             |             |            |              |            |
|--------------------|-----------------|-------|---|-----------------|-----------|-------------|------------|-------------|-------------|------------|--------------|------------|
|                    |                 |       |   | LYII27_18       | M2        | 4.15        | 1.2        | 43.8        | 15.9        | 3.2        | -19.9        | 9.5        |
|                    |                 |       |   | LYII27_19       | M2        | 5.25        | 0.9        | 43.9        | 15.8        | 3.2        | -19.6        | 9.1        |
|                    |                 |       |   | LYII27_20       | M2        | 6.35        | 0.6        | 44.8        | 16.2        | 3.2        | -19.5        | 9.5        |
|                    |                 |       |   | LYII27_21       | M2        | 7.45        | 0.9        | 42.9        | 15.3        | 3.3        | -19.7        | 9.3        |
|                    |                 |       |   | LYII27_22       | M2        | 8.33        | 1.1        | 43.8        | 15.8        | 3.2        | -19.8        | 9.3        |
|                    |                 |       |   | LYII27_23       | M2        | 9.00        | 0.7        | 42.4        | 15.3        | 3.2        | -19.6        | 9.1        |
|                    |                 |       |   | LYII27_24       | M2        | 9.67        | 1.2        | 45.7        | 16.4        | 3.2        | -19.5        | 9.8        |
|                    |                 |       |   | LYII27_25       | M2        | 10.25       | 1.1        | 43.4        | 15.7        | 3.2        | -19.6        | 8.8        |
|                    |                 |       |   | LYII27_26       | M2        | 10.75       | 1.1        | 46.6        | 16.7        | 3.2        | -19.5        | 9.8        |
|                    |                 |       |   | LYII27_27       | M2        | 11.25       | 0.6        | 42.1        | 15.1        | 3.3        | -19.3        | 10.3       |
|                    |                 |       |   | LYII27_28       | M2        | 11.75       | 0.9        | 48.5        | 17.5        | 3.2        | -19.4        | 10.5       |
|                    |                 |       |   | LYII27_29       | M2        | 12.67       | 0.9        | 44.9        | 16.1        | 3.3        | -19.4        | 10.2       |
|                    |                 |       |   | LYII27_30       | M2        | 14.00       | 1.1        | 45.1        | 16.2        | 3.2        | -19.6        | 10.2       |
|                    |                 |       |   | LYII27_31       | M2        | 15.33       | 0.8        | 43.3        | 15.5        | 3.3        | -19.7        | 10.2       |
| 1. Las Yurdinas II | LYII.A.10.15077 | 24-30 | M | LYII29_1        | M1        | 0.30        | 0.4        | 41.4        | 14.2        | 3.4        | -19.5        | 10.7       |
|                    |                 |       |   | LYII29_2        | M1        | 0.90        | 0.9        | 48.0        | 17.5        | 3.2        | -19.3        | 11.3       |
|                    |                 |       |   | LYII29_3        | M1        | 1.50        | 0.8        | 43.2        | 15.6        | 3.2        | -19.2        | 11.2       |
|                    |                 |       |   | <i>LYII29_4</i> | <i>M1</i> | <i>2.10</i> | <i>0.0</i> |             |             |            |              |            |
|                    |                 |       |   | LYII29_5        | M1        | 2.70        | 1.0        | 41.5        | 15.3        | 3.2        | -19.7        | 9.4        |
|                    |                 |       |   | LYII29_6        | M1        | 3.20        | 0.6        | 47.3        | 17.2        | 3.2        | -19.9        | 8.5        |
|                    |                 |       |   | <i>LYII29_7</i> | <i>M1</i> | <i>3.60</i> | <i>0.7</i> | <i>29.7</i> | <i>10.4</i> | <i>3.3</i> | <i>-20.4</i> | <i>8.9</i> |
|                    |                 |       |   | LYII29_8        | M1        | 4.00        | 1.1        | 42.8        | 15.6        | 3.2        | -19.9        | 8.7        |
|                    |                 |       |   | LYII29_9        | M1        | 4.40        | 1.1        | 43.3        | 15.6        | 3.2        | -20.1        | 8.9        |
|                    |                 |       |   | LYII29_10       | M1        | 4.80        | 1.1        | 42.9        | 15.6        | 3.2        | -20.0        | 8.9        |
|                    |                 |       |   | LYII29_11       | M1        | 5.33        | 1.1        | 41.5        | 15.1        | 3.2        | -19.7        | 9.2        |

|                    |                 |       |   |                  |           |             |     |      |      |     |       |      |
|--------------------|-----------------|-------|---|------------------|-----------|-------------|-----|------|------|-----|-------|------|
|                    |                 |       |   | <i>LYII29_12</i> | <i>M1</i> | <i>6.00</i> |     |      |      |     |       |      |
|                    |                 |       |   | LYII29_13        | M1        | 6.67        | 1.1 | 41.6 | 15.1 | 3.2 | -19.8 | 9.2  |
|                    |                 |       |   | LYII29_14        | M1        | 7.75        | 1.1 | 44.5 | 16.2 | 3.2 | -19.8 | 9.2  |
|                    |                 |       |   | LYII29_15        | M1        | 9.25        | 1.0 | 42.8 | 15.5 | 3.2 | -19.8 | 8.8  |
|                    |                 |       |   | LYII29_16        | M2        | 4.56        | 0.6 | 42.8 | 15.6 | 3.2 | -20.0 | 8.9  |
|                    |                 |       |   | LYII29_17        | M2        | 5.94        | 0.9 | 42.0 | 15.3 | 3.2 | -20.0 | 8.8  |
|                    |                 |       |   | LYII29_18        | M2        | 7.31        | 0.7 | 40.9 | 14.9 | 3.2 | -19.9 | 9.2  |
|                    |                 |       |   | LYII29_19        | M2        | 8.20        | 0.8 | 42.2 | 15.4 | 3.2 | -19.8 | 8.4  |
|                    |                 |       |   | LYII29_20        | M2        | 8.60        | 0.8 | 43.6 | 15.9 | 3.2 | -20.0 | 7.9  |
|                    |                 |       |   | LYII29_21        | M2        | 9.00        | 0.9 | 46.3 | 16.9 | 3.2 | -19.7 | 7.9  |
|                    |                 |       |   | LYII29_22        | M2        | 9.40        | 0.8 | 44.4 | 16.1 | 3.2 | -19.5 | 8.2  |
|                    |                 |       |   | LYII29_23        | M2        | 9.80        | 0.8 | 42.5 | 15.4 | 3.2 | -19.6 | 8.9  |
|                    |                 |       |   | LYII29_24        | M2        | 10.50       | 0.9 | 39.3 | 14.2 | 3.2 | -19.7 | 9.6  |
|                    |                 |       |   | LYII29_25        | M2        | 11.50       | 1.0 | 42.9 | 15.6 | 3.2 | -20.0 | 9.4  |
|                    |                 |       |   | LYII29_26        | M2        | 13.00       | 0.9 | 47.6 | 17.4 | 3.2 | -19.5 | 10.5 |
|                    |                 |       |   | LYII29_27        | M2        | 15.00       | 1.0 | 43.9 | 16.0 | 3.2 | -19.5 | 10.1 |
| 1. Las Yurdinas II | LYII.A.10.15064 | 35-40 | M | LYII30_1         | M1        | 0.90        | 0.8 | 47.6 | 17.0 | 3.3 | -19.9 | 10.8 |
|                    |                 |       |   | LYII30_2         | M1        | 1.50        | 1.2 | 43.9 | 15.7 | 3.3 | -19.7 | 10.5 |
|                    |                 |       |   | LYII30_3         | M1        | 2.10        | 1.0 | 42.4 | 15.3 | 3.2 | -19.8 | 10.0 |
|                    |                 |       |   | LYII30_4         | M1        | 2.70        | 1.0 | 42.2 | 15.1 | 3.3 | -20.0 | 9.5  |
|                    |                 |       |   | LYII30_5         | M1        | 3.25        | 0.9 | 44.7 | 15.8 | 3.3 | -20.4 | 9.4  |
|                    |                 |       |   | LYII30_6         | M1        | 3.75        | 1.1 | 43.4 | 15.5 | 3.3 | -20.0 | 9.3  |
|                    |                 |       |   | LYII30_7         | M1        | 4.25        | 1.2 | 41.9 | 15.1 | 3.2 | -19.9 | 9.4  |
|                    |                 |       |   | LYII30_8         | M1        | 4.75        | 1.0 | 44.1 | 15.7 | 3.3 | -20.2 | 9.3  |
|                    |                 |       |   | LYII30_9         | M1        | 5.25        | 0.7 | 44.6 | 16.3 | 3.2 | -20.0 | 10.1 |

|                    |                 |       |   |           |    |       |     |      |      |     |       |      |
|--------------------|-----------------|-------|---|-----------|----|-------|-----|------|------|-----|-------|------|
|                    |                 |       |   | LYII30_10 | M1 | 5.75  | 1.2 | 48.0 | 17.5 | 3.2 | -20.0 | 9.7  |
|                    |                 |       |   | LYII30_11 | M1 | 6.25  | 1.2 | 47.2 | 17.1 | 3.2 | -20.0 | 9.9  |
|                    |                 |       |   | LYII30_12 | M1 | 6.75  | 1.2 | 42.1 | 15.3 | 3.2 | -19.8 | 9.9  |
|                    |                 |       |   | LYII30_13 | M1 | 7.38  | 1.2 | 41.7 | 15.1 | 3.2 | -20.0 | 9.6  |
|                    |                 |       |   | LYII30_14 | M1 | 8.13  | 0.9 | 36.8 | 13.1 | 3.3 | -20.0 | 9.8  |
|                    |                 |       |   | LYII30_15 | M1 | 8.88  | 0.9 | 43.2 | 15.4 | 3.3 | -20.1 | 9.7  |
|                    |                 |       |   | LYII30_16 | M1 | 9.63  | 0.8 | 43.2 | 15.4 | 3.3 | -20.0 | 9.4  |
|                    |                 |       |   | LYII30_17 | M2 | 3.05  | 0.5 | 40.1 | 14.6 | 3.2 | -20.0 | 9.5  |
|                    |                 |       |   | LYII30_18 | M2 | 4.15  | 0.6 | 40.9 | 14.9 | 3.2 | -20.0 | 9.7  |
|                    |                 |       |   | LYII30_19 | M2 | 5.25  | 0.6 | 41.6 | 15.1 | 3.2 | -20.3 | 9.6  |
|                    |                 |       |   | LYII30_20 | M2 | 6.35  | 0.9 | 36.0 | 13.1 | 3.2 | -20.3 | 9.0  |
|                    |                 |       |   | LYII30_21 | M2 | 7.45  | 0.8 | 42.1 | 15.3 | 3.2 | -20.1 | 9.1  |
|                    |                 |       |   | LYII30_22 | M2 | 8.20  | 0.8 | 42.3 | 15.3 | 3.2 | -19.9 | 9.4  |
|                    |                 |       |   | LYII30_23 | M2 | 8.60  | 0.5 | 40.8 | 14.7 | 3.2 | -20.0 | 9.6  |
|                    |                 |       |   | LYII30_24 | M2 | 9.00  | 0.9 | 42.4 | 15.4 | 3.2 | -19.9 | 9.3  |
|                    |                 |       |   | LYII30_25 | M2 | 9.40  | 0.9 | 43.8 | 15.8 | 3.2 | -19.9 | 9.3  |
|                    |                 |       |   | LYII30_26 | M2 | 9.80  | 0.6 | 41.9 | 15.1 | 3.2 | -19.7 | 9.4  |
|                    |                 |       |   | LYII30_27 | M2 | 10.33 | 0.7 | 41.2 | 15.0 | 3.2 | -19.9 | 9.0  |
|                    |                 |       |   | LYII30_28 | M2 | 11.00 | 0.9 | 45.5 | 16.6 | 3.2 | -19.8 | 9.2  |
|                    |                 |       |   | LYII30_29 | M2 | 11.67 | 0.9 | 47.4 | 17.1 | 3.2 | -20.0 | 9.4  |
|                    |                 |       |   | LYII30_30 | M2 | 13.00 | 0.9 | 42.4 | 15.4 | 3.2 | -20.0 | 9.1  |
|                    |                 |       |   | LYII30_31 | M2 | 15.00 | 0.9 | 41.8 | 15.2 | 3.2 | -20.1 | 9.8  |
| 1. Las Yurdinas II | LYII.A.10.15120 | 20-24 | M | LYII34_1  | M1 | 0.38  | 0.4 | 41.1 | 14.7 | 3.3 | -18.7 | 13.2 |
|                    |                 |       |   | LYII34_2  | M1 | 1.13  | 0.5 | 44.2 | 15.9 | 3.3 | -18.7 | 12.4 |
|                    |                 |       |   | LYII34_3  | M1 | 1.88  | 0.7 | 41.6 | 15.0 | 3.2 | -19.2 | 11.4 |

|                    |                 |       |    |                  |           |             |            |             |             |            |              |            |
|--------------------|-----------------|-------|----|------------------|-----------|-------------|------------|-------------|-------------|------------|--------------|------------|
|                    |                 |       |    | LYII34_4         | M1        | 2.63        | 0.6        | 40.4        | 14.5        | 3.3        | -19.7        | 9.0        |
|                    |                 |       |    | LYII34_5         | M1        | 3.20        | 0.7        | 41.8        | 14.8        | 3.3        | -19.6        | 9.7        |
|                    |                 |       |    | LYII34_6         | M1        | 3.60        | 0.5        | 41.9        | 14.9        | 3.3        | -19.5        | 9.7        |
|                    |                 |       |    | LYII34_7         | M1        | 4.00        | 0.8        | 41.0        | 14.6        | 3.3        | -19.7        | 9.1        |
|                    |                 |       |    | LYII34_8         | M1        | 4.40        | 0.7        | 40.6        | 14.4        | 3.3        | -19.7        | 9.1        |
|                    |                 |       |    | LYII34_9         | M1        | 4.80        | 0.4        | 41.3        | 14.5        | 3.3        | -19.4        | 9.1        |
|                    |                 |       |    | LYII34_10        | M1        | 5.33        | 1.0        | 45.1        | 16.3        | 3.2        | -19.7        | 9.9        |
|                    |                 |       |    | LYII34_11        | M1        | 6.00        | 1.0        | 40.7        | 14.7        | 3.2        | -19.8        | 9.5        |
|                    |                 |       |    | LYII34_12        | M1        | 6.67        | 0.6        | 41.6        | 14.8        | 3.3        | -19.6        | 9.2        |
|                    |                 |       |    | LYII34_13        | M1        | 7.75        | 1.1        | 41.3        | 14.9        | 3.2        | -19.2        | 9.5        |
|                    |                 |       |    | LYII34_14        | M1        | 9.25        | 0.6        | 41.7        | 15.0        | 3.3        | -19.2        | 10.0       |
|                    |                 |       |    | LYII34_15        | M2        | 3.05        | 0.7        | 46.1        | 16.6        | 3.2        | -19.5        | 9.8        |
|                    |                 |       |    | LYII34_16        | M2        | 4.15        | 0.9        | 46.3        | 16.7        | 3.2        | -19.7        | 9.8        |
|                    |                 |       |    | LYII34_17        | M2        | 5.25        | 0.8        | 45.3        | 16.3        | 3.2        | -19.7        | 9.2        |
|                    |                 |       |    | LYII34_18        | M2        | 6.35        | 1.0        | 44.8        | 16.0        | 3.3        | -19.4        | 8.9        |
|                    |                 |       |    | LYII34_19        | M2        | 7.45        | 0.9        | 45.1        | 16.2        | 3.3        | -19.1        | 9.4        |
|                    |                 |       |    | LYII34_20        | M2        | 8.33        | 0.6        | 47.7        | 17.5        | 3.2        | -18.8        | 10.1       |
|                    |                 |       |    | <i>LYII34_21</i> | <i>M2</i> | <i>9.00</i> | <i>0.3</i> | <i>41.5</i> | <i>14.3</i> | <i>3.4</i> | <i>-19.4</i> | <i>8.7</i> |
|                    |                 |       |    | LYII34_22        | M2        | 9.67        | 0.6        | 44.0        | 16.0        | 3.2        | -18.8        | 10.0       |
|                    |                 |       |    | LYII34_23        | M2        | 10.33       | 0.7        | 46.8        | 16.8        | 3.2        | -18.9        | 8.9        |
|                    |                 |       |    | LYII34_24        | M2        | 11.00       | 0.5        | 45.5        | 16.3        | 3.3        | -18.7        | 9.0        |
|                    |                 |       |    | LYII34_25        | M2        | 11.67       | 0.8        | 44.6        | 15.9        | 3.3        | -19.2        | 9.2        |
|                    |                 |       |    | LYII34_26        | M2        | 13.00       | 0.6        | 44.1        | 16.0        | 3.2        | -19.0        | 9.6        |
|                    |                 |       |    | LYII34_27        | M2        | 15.00       | 0.9        | 44.3        | 15.9        | 3.2        | -19.2        | 9.6        |
| 1. Las Yurdinas II | LYII.A.10.15098 | 24-40 | M? | LYII40_1         | M1        | 0.30        | 0.5        | 42.5        | 15.3        | 3.2        | -19.2        | 11.9       |



|                    |                 |       |   |                  |           |              |            |             |             |            |              |            |
|--------------------|-----------------|-------|---|------------------|-----------|--------------|------------|-------------|-------------|------------|--------------|------------|
|                    |                 |       |   | LYII40_2         | M1        | 0.90         | 0.6        | 41.7        | 15.0        | 3.2        | -18.9        | 11.9       |
|                    |                 |       |   | LYII40_3         | M1        | 1.50         | 0.9        | 45.0        | 16.2        | 3.2        | -19.3        | 11.5       |
|                    |                 |       |   | LYII40_4         | M1        | 2.10         | 1.2        | 41.2        | 15.0        | 3.2        | -19.7        | 9.6        |
|                    |                 |       |   | LYII40_5         | M1        | 2.70         | 1.0        | 41.7        | 15.1        | 3.2        | -19.7        | 10.4       |
|                    |                 |       |   | LYII40_6         | M1        | 3.20         | 1.1        | 40.7        | 14.7        | 3.2        | -19.7        | 8.5        |
|                    |                 |       |   | LYII40_7         | M1        | 3.60         | 0.9        | 41.1        | 14.8        | 3.2        | -19.7        | 8.8        |
|                    |                 |       |   | LYII40_8         | M1        | 4.00         | 0.8        | 41.6        | 15.0        | 3.2        | -20.0        | 8.3        |
|                    |                 |       |   | LYII40_9         | M1        | 4.40         | 1.1        | 40.0        | 14.5        | 3.2        | -19.9        | 8.6        |
|                    |                 |       |   | LYII40_10        | M1        | 4.80         | 1.1        | 40.1        | 14.5        | 3.2        | -20.1        | 9.0        |
|                    |                 |       |   | LYII40_11        | M1        | 5.50         | 1.0        | 40.5        | 14.7        | 3.2        | -20.1        | 9.1        |
|                    |                 |       |   | LYII40_12        | M1        | 6.50         | 1.2        | 40.6        | 14.7        | 3.2        | -19.9        | 9.2        |
|                    |                 |       |   | LYII40_13        | M1        | 7.50         | 1.0        | 41.9        | 15.1        | 3.2        | -19.5        | 9.1        |
|                    |                 |       |   | LYII40_14        | M1        | 8.50         | 1.0        | 43.5        | 15.6        | 3.2        | -19.7        | 9.3        |
|                    |                 |       |   | LYII40_15        | M1        | 9.50         | 1.1        | 40.9        | 14.7        | 3.2        | -19.8        | 9.1        |
|                    |                 |       |   | LYII40_16        | M2        | 3.42         | 0.6        | 46.5        | 17.0        | 3.2        | -19.5        | 8.9        |
|                    |                 |       |   | LYII40_17        | M2        | 5.25         | 1.1        | 48.6        | 17.7        | 3.2        | -19.8        | 8.6        |
|                    |                 |       |   | LYII40_18        | M2        | 7.08         | 0.9        | 44.0        | 16.0        | 3.2        | -19.6        | 8.7        |
|                    |                 |       |   | LYII40_19        | M2        | 8.33         | 1.0        | 42.7        | 15.5        | 3.2        | -19.8        | 8.3        |
|                    |                 |       |   | LYII40_20        | M2        | 9.00         | 1.0        | 34.2        | 12.2        | 3.3        | -20.1        | 8.4        |
|                    |                 |       |   | LYII40_21        | M2        | 9.67         | 1.2        | 32.2        | 11.6        | 3.2        | -19.7        | 7.8        |
|                    |                 |       |   | LYII40_22        | M2        | 10.50        | 1.2        | 38.4        | 13.9        | 3.2        | -19.2        | 8.0        |
|                    |                 |       |   | LYII40_23        | M2        | 11.50        | 0.7        | 42.3        | 15.0        | 3.3        | -19.5        | 7.7        |
|                    |                 |       |   | <i>LYII40_24</i> | <i>M2</i> | <i>11.75</i> | <i>0.2</i> | <i>42.6</i> | <i>13.8</i> | <i>3.6</i> | <i>-19.8</i> | <i>6.4</i> |
|                    |                 |       |   | LYII40_25        | M2        | 15.00        | 0.8        | 42.6        | 15.1        | 3.3        | -19.6        | 8.8        |
| 1. Las Yurdinas II | LYII.A.10.15067 | 20-24 | F | LYII41_1         | M1        | 0.90         | 0.6        | 40.4        | 14.4        | 3.3        | -19.3        | 12.6       |

|  |  |  |  |                  |           |              |            |             |             |            |              |             |
|--|--|--|--|------------------|-----------|--------------|------------|-------------|-------------|------------|--------------|-------------|
|  |  |  |  | LYII41_2         | M1        | 1.50         | 1.2        | 45.3        | 16.4        | 3.2        | -19.3        | 11.8        |
|  |  |  |  | LYII41_3         | M1        | 2.10         | 0.4        | 40.0        | 14.1        | 3.3        | -19.6        | 10.6        |
|  |  |  |  | LYII41_4         | M1        | 2.70         | 1.0        | 44.1        | 15.9        | 3.2        | -19.6        | 10.1        |
|  |  |  |  | LYII41_5         | M1        | 3.20         | 1.0        | 41.6        | 15.0        | 3.2        | -19.6        | 9.7         |
|  |  |  |  | LYII41_6         | M1        | 3.60         | 1.1        | 41.2        | 14.9        | 3.2        | -19.4        | 9.6         |
|  |  |  |  | LYII41_7         | M1        | 4.00         | 1.0        | 41.1        | 14.8        | 3.2        | -19.5        | 9.1         |
|  |  |  |  | LYII41_8         | M1        | 4.40         | 0.9        | 41.8        | 15.0        | 3.3        | -19.4        | 9.1         |
|  |  |  |  | LYII41_9         | M1        | 4.80         | 1.1        | 40.4        | 14.6        | 3.2        | -19.5        | 9.1         |
|  |  |  |  | LYII41_10        | M1        | 5.50         | 0.9        | 41.7        | 15.0        | 3.2        | -19.4        | 9.0         |
|  |  |  |  | LYII41_11        | M1        | 6.50         | 1.2        | 41.6        | 15.1        | 3.2        | -19.4        | 9.4         |
|  |  |  |  | LYII41_12        | M1        | 7.50         | 1.1        | 41.3        | 15.0        | 3.2        | -19.4        | 9.5         |
|  |  |  |  | LYII41_13        | M1        | 8.50         | 1.0        | 40.0        | 14.5        | 3.2        | -19.6        | 9.5         |
|  |  |  |  | LYII41_14        | M1        | 9.50         | 0.7        | 41.6        | 14.9        | 3.3        | -19.7        | 9.6         |
|  |  |  |  | LYII41_15        | M2        | 3.19         | 0.6        | 41.4        | 15.0        | 3.2        | -19.4        | 9.9         |
|  |  |  |  | LYII41_16        | M2        | 4.56         | 1.1        | 42.9        | 15.5        | 3.2        | -19.5        | 9.0         |
|  |  |  |  | LYII41_17        | M2        | 5.94         | 1.2        | 37.9        | 13.6        | 3.2        | -19.6        | 8.9         |
|  |  |  |  | LYII41_18        | M2        | 7.31         | 1.1        | 48.7        | 17.6        | 3.2        | -19.7        | 9.1         |
|  |  |  |  | LYII41_19        | M2        | 8.33         | 1.1        | 55.2        | 20.2        | 3.2        | -19.5        | 9.4         |
|  |  |  |  | <i>LYII41_20</i> | <i>M2</i> | <i>9.00</i>  | <i>0.9</i> | <i>45.1</i> | <i>16.3</i> | <i>3.2</i> | <i>-19.6</i> | <i>13.7</i> |
|  |  |  |  | LYII41_21        | M2        | 9.67         | 0.7        | 43.3        | 15.4        | 3.3        | -19.6        | 9.5         |
|  |  |  |  | LYII41_22        | M2        | 10.33        | 0.6        | 43.9        | 16.0        | 3.2        | -19.1        | 9.8         |
|  |  |  |  | LYII41_23        | M2        | 11.00        | 0.5        | 46.4        | 16.8        | 3.2        | -19.0        | 10.2        |
|  |  |  |  | LYII41_24        | M2        | 11.67        | 0.6        | 41.9        | 15.2        | 3.2        | -19.1        | 10.1        |
|  |  |  |  | <i>LYII41_25</i> | <i>M2</i> | <i>12.67</i> | <i>0.3</i> | <i>42.4</i> | <i>14.5</i> | <i>3.4</i> | <i>-19.7</i> | <i>8.9</i>  |
|  |  |  |  | LYII41_26        | M2        | 14.67        | 0.9        | 43.2        | 15.4        | 3.3        | -19.7        | 9.7         |

|                    |                 |       |   |                 |           |             |            |             |            |            |              |            |
|--------------------|-----------------|-------|---|-----------------|-----------|-------------|------------|-------------|------------|------------|--------------|------------|
| 1. Las Yurdinas II | LYII.A.10.15071 | 35-40 | F | LYII42_1        | M1        | 1.50        | 0.8        | 46.0        | 16.7       | 3.2        | -20.5        | 9.6        |
|                    |                 |       |   | LYII42_2        | M1        | 2.10        | 0.9        | 44.9        | 16.4       | 3.2        | -20.6        | 9.4        |
|                    |                 |       |   | LYII42_3        | M1        | 2.70        | 0.9        | 41.0        | 14.9       | 3.2        | -20.2        | 8.6        |
|                    |                 |       |   | LYII42_4        | M1        | 3.25        | 1.1        | 43.7        | 15.9       | 3.2        | -20.1        | 8.5        |
|                    |                 |       |   | LYII42_5        | M1        | 3.75        | 1.2        | 45.0        | 16.3       | 3.2        | -20.1        | 8.3        |
|                    |                 |       |   | LYII42_6        | M1        | 4.25        | 1.2        | 49.8        | 18.2       | 3.2        | -20.0        | 9.0        |
|                    |                 |       |   | LYII42_7        | M1        | 4.75        | 1.0        | 42.6        | 15.4       | 3.2        | -20.2        | 8.9        |
|                    |                 |       |   | LYII42_8        | M1        | 5.33        | 1.2        | 42.3        | 15.4       | 3.2        | -20.2        | 9.1        |
|                    |                 |       |   | <i>LYII42_9</i> | <i>M1</i> | <i>6.00</i> | <i>0.9</i> | <i>27.7</i> | <i>9.8</i> | <i>3.3</i> | <i>-20.5</i> | <i>8.4</i> |
|                    |                 |       |   | LYII42_10       | M1        | 6.67        | 1.2        | 43.3        | 15.7       | 3.2        | -20.3        | 8.9        |
|                    |                 |       |   | LYII42_11       | M1        | 7.75        | 0.8        | 42.7        | 15.3       | 3.2        | -20.5        | 8.7        |
|                    |                 |       |   | LYII42_12       | M1        | 9.25        | 1.0        | 44.0        | 15.8       | 3.2        | -20.4        | 9.5        |
|                    |                 |       |   | LYII42_13       | M2        | 3.05        | 0.5        | 41.6        | 15.2       | 3.2        | -20.3        | 9.2        |
|                    |                 |       |   | LYII42_14       | M2        | 4.15        | 1.0        | 42.1        | 15.4       | 3.2        | -20.4        | 9.1        |
|                    |                 |       |   | LYII42_15       | M2        | 5.25        | 0.9        | 43.4        | 15.6       | 3.2        | -20.6        | 8.9        |
|                    |                 |       |   | LYII42_16       | M2        | 6.35        | 1.0        | 46.2        | 16.8       | 3.2        | -20.5        | 8.9        |
|                    |                 |       |   | LYII42_17       | M2        | 7.45        | 1.0        | 43.1        | 15.7       | 3.2        | -20.3        | 8.9        |
|                    |                 |       |   | LYII42_18       | M2        | 8.33        | 1.1        | 44.2        | 16.0       | 3.2        | -20.4        | 8.9        |
|                    |                 |       |   | LYII42_19       | M2        | 9.00        | 0.9        | 42.3        | 15.3       | 3.2        | -20.5        | 9.1        |
|                    |                 |       |   | LYII42_20       | M2        | 9.67        | 0.9        | 43.7        | 15.8       | 3.2        | -20.4        | 8.8        |
|                    |                 |       |   | LYII42_21       | M2        | 10.33       | 0.9        | 42.5        | 15.3       | 3.2        | -20.1        | 9.1        |
|                    |                 |       |   | LYII42_22       | M2        | 11.00       | 0.8        | 42.6        | 15.4       | 3.2        | -20.2        | 9.0        |
|                    |                 |       |   | LYII42_23       | M2        | 11.67       | 0.6        | 44.0        | 15.9       | 3.2        | -20.3        | 9.2        |
|                    |                 |       |   | LYII42_24       | M2        | 13.00       | 0.4        | 41.1        | 14.9       | 3.2        | -20.5        | 9.0        |
|                    |                 |       |   | LYII42_25       | M2        | 15.00       | 1.1        | 43.1        | 15.8       | 3.2        | -20.3        | 9.2        |

|                    |                 |       |   |           |    |       |     |      |      |     |       |      |
|--------------------|-----------------|-------|---|-----------|----|-------|-----|------|------|-----|-------|------|
| 1. Las Yurdinas II | LYII.A.10.15089 | 24-35 | F | LYII43_1  | M1 | 0.64  | 1.1 | 40.7 | 14.8 | 3.2 | -19.8 | 12.4 |
|                    |                 |       |   | LYII43_2  | M1 | 1.07  | 0.9 | 41.5 | 15.0 | 3.2 | -19.5 | 11.6 |
|                    |                 |       |   | LYII43_3  | M1 | 1.50  | 0.9 | 42.8 | 15.5 | 3.2 | -19.6 | 10.8 |
|                    |                 |       |   | LYII43_4  | M1 | 1.93  | 0.8 | 41.7 | 15.1 | 3.2 | -19.5 | 10.0 |
|                    |                 |       |   | LYII43_5  | M1 | 2.36  | 1.1 | 41.8 | 15.2 | 3.2 | -19.7 | 9.8  |
|                    |                 |       |   | LYII43_6  | M1 | 2.79  | 1.0 | 40.9 | 14.8 | 3.2 | -19.8 | 9.6  |
|                    |                 |       |   | LYII43_7  | M1 | 3.20  | 1.1 | 41.1 | 14.9 | 3.2 | -20.0 | 8.7  |
|                    |                 |       |   | LYII43_8  | M1 | 3.60  | 0.7 | 40.2 | 14.4 | 3.3 | -20.0 | 8.0  |
|                    |                 |       |   | LYII43_9  | M1 | 4.00  | 0.9 | 40.4 | 14.6 | 3.2 | -19.9 | 8.6  |
|                    |                 |       |   | LYII43_10 | M1 | 4.40  | 1.1 | 41.0 | 14.7 | 3.3 | -20.1 | 8.9  |
|                    |                 |       |   | LYII43_11 | M1 | 4.80  | 0.5 | 41.5 | 14.7 | 3.3 | -19.9 | 7.4  |
|                    |                 |       |   | LYII43_12 | M1 | 5.33  | 1.0 | 41.4 | 14.9 | 3.2 | -19.8 | 8.6  |
|                    |                 |       |   | LYII43_13 | M1 | 6.00  | 1.0 | 41.9 | 15.1 | 3.2 | -19.9 | 8.7  |
|                    |                 |       |   | LYII43_14 | M1 | 6.67  | 1.1 | 39.9 | 14.4 | 3.2 | -20.1 | 9.0  |
|                    |                 |       |   | LYII43_15 | M1 | 7.50  | 0.8 | 41.9 | 14.9 | 3.3 | -20.1 | 9.6  |
|                    |                 |       |   | LYII43_16 | M1 | 8.50  | 0.4 | 40.1 | 14.1 | 3.3 | -20.2 | 9.0  |
|                    |                 |       |   | LYII43_17 | M1 | 9.50  | 0.6 | 42.1 | 15.0 | 3.3 | -20.2 | 9.8  |
|                    |                 |       |   | LYII43_18 | M2 | 3.42  | 0.9 | 44.3 | 16.2 | 3.2 | -19.9 | 8.5  |
|                    |                 |       |   | LYII43_19 | M2 | 5.25  | 1.2 | 33.6 | 12.0 | 3.3 | -19.7 | 8.2  |
|                    |                 |       |   | LYII43_20 | M2 | 7.08  | 0.8 | 42.5 | 15.3 | 3.2 | -20.2 | 8.6  |
|                    |                 |       |   | LYII43_21 | M2 | 8.33  | 0.8 | 42.4 | 15.2 | 3.3 | -20.3 | 8.5  |
|                    |                 |       |   | LYII43_22 | M2 | 9.00  | 1.0 | 40.4 | 14.4 | 3.3 | -20.4 | 8.2  |
|                    |                 |       |   | LYII43_23 | M2 | 9.67  | 0.4 | 44.2 | 15.4 | 3.3 | -20.3 | 7.8  |
|                    |                 |       |   | LYII43_24 | M2 | 10.50 | 0.4 | 43.8 | 15.6 | 3.3 | -20.0 | 8.0  |
|                    |                 |       |   | LYII43_25 | M2 | 11.50 | 0.6 | 40.5 | 14.5 | 3.3 | -19.9 | 8.8  |

|                    |                 |       |   |                  |           |             |            |             |             |            |              |             |
|--------------------|-----------------|-------|---|------------------|-----------|-------------|------------|-------------|-------------|------------|--------------|-------------|
|                    |                 |       |   | LYII43_26        | M2        | 13.00       | 0.5        | 45.1        | 16.2        | 3.3        | -20.0        | 9.4         |
|                    |                 |       |   | LYII43_27        | M2        | 15.00       | 0.4        | 43.5        | 15.0        | 3.4        | -20.3        | 9.1         |
| 1. Las Yurdinas II | LYII.A.10.15085 | 24-30 | F | <i>LYII56_1</i>  | <i>M1</i> | <i>0.50</i> | <i>0.3</i> | <i>40.0</i> | <i>13.5</i> | <i>3.5</i> | <i>-19.8</i> | <i>10.9</i> |
|                    |                 |       |   | LYII56_2         | M1        | 1.50        | 0.7        | 42.8        | 15.3        | 3.3        | -20.1        | 11.1        |
|                    |                 |       |   | LYII56_3         | M1        | 2.50        | 0.4        | 41.7        | 14.8        | 3.3        | -20.4        | 9.6         |
|                    |                 |       |   | LYII56_4         | M1        | 3.25        | 0.5        | 40.6        | 14.3        | 3.3        | -20.2        | 9.9         |
|                    |                 |       |   | LYII56_5         | M1        | 3.75        | 0.5        | 44.6        | 15.6        | 3.3        | -20.0        | 9.7         |
|                    |                 |       |   | LYII56_6         | M1        | 4.25        | 0.8        | 41.9        | 14.8        | 3.3        | -20.0        | 9.9         |
|                    |                 |       |   | LYII56_7         | M1        | 4.75        | 0.8        | 40.8        | 14.3        | 3.3        | -20.2        | 9.7         |
|                    |                 |       |   | LYII56_8         | M1        | 5.25        | 0.6        | 42.0        | 14.7        | 3.3        | -20.0        | 9.7         |
|                    |                 |       |   | LYII56_9         | M1        | 5.75        | 0.7        | 41.6        | 14.5        | 3.3        | -20.1        | 9.5         |
|                    |                 |       |   | LYII56_10        | M1        | 6.25        | 0.6        | 42.1        | 14.7        | 3.3        | -19.8        | 9.8         |
|                    |                 |       |   | LYII56_11        | M1        | 6.75        | 0.9        | 42.6        | 15.1        | 3.3        | -20.4        | 9.9         |
|                    |                 |       |   | LYII56_12        | M1        | 7.38        | 0.6        | 41.7        | 14.7        | 3.3        | -20.3        | 10.2        |
|                    |                 |       |   | LYII56_13        | M1        | 8.13        | 0.6        | 42.1        | 14.9        | 3.3        | -20.0        | 10.1        |
|                    |                 |       |   | LYII56_14        | M1        | 8.88        | 0.6        | 41.4        | 14.7        | 3.3        | -19.9        | 10.2        |
|                    |                 |       |   | LYII56_15        | M1        | 9.63        | 0.4        | 41.8        | 14.7        | 3.3        | -19.9        | 10.1        |
|                    |                 |       |   | LYII56_16        | M2        | 3.19        | 0.7        | 42.8        | 15.3        | 3.3        | -20.2        | 9.8         |
|                    |                 |       |   | <i>LYII56_17</i> | <i>M2</i> | <i>4.56</i> | <i>0.3</i> | <i>46.5</i> | <i>16.1</i> | <i>3.4</i> | <i>-20.3</i> | <i>9.4</i>  |
|                    |                 |       |   | LYII56_18        | M2        | 6.63        | 0.8        | 43.4        | 15.5        | 3.3        | -20.2        | 10.1        |
|                    |                 |       |   | LYII56_19        | M2        | 8.33        | 0.6        | 43.0        | 15.3        | 3.3        | -19.7        | 10.9        |
|                    |                 |       |   | <i>LYII56_20</i> | <i>M2</i> | <i>9.00</i> | <i>0.3</i> | <i>42.2</i> | <i>14.4</i> | <i>3.4</i> | <i>-20.0</i> | <i>9.6</i>  |
|                    |                 |       |   | LYII56_21        | M2        | 9.67        | 0.5        | 46.9        | 16.8        | 3.3        | -19.4        | 9.3         |
|                    |                 |       |   | LYII56_22        | M2        | 11.00       | 0.6        | 44.6        | 15.9        | 3.3        | -19.7        | 10.2        |
|                    |                 |       |   | LYII56_23        | M2        | 14.00       | 0.7        | 43.6        | 15.2        | 3.4        | -20.0        | 9.6         |

|                |            |       |    |                 |           |             |            |      |      |     |       |      |
|----------------|------------|-------|----|-----------------|-----------|-------------|------------|------|------|-----|-------|------|
| 2. Los Husos I | LHI.F1.378 | 40-45 | F? | LHI57_1         | M1        | 1.50        | 0.6        | 43.9 | 15.7 | 3.3 | -19.7 | 8.7  |
|                |            |       |    | LHI57_2         | M1        | 2.10        | 0.5        | 40.7 | 14.4 | 3.3 | -20.0 | 8.8  |
|                |            |       |    | LHI57_3         | M1        | 2.70        | 0.7        | 42.5 | 14.7 | 3.4 | -20.0 | 8.5  |
|                |            |       |    | <i>LHI57_4</i>  | <i>M1</i> |             |            |      |      |     |       |      |
|                |            |       |    | LHI57_5         | M1        | 3.75        | 1.0        | 44.9 | 16.1 | 3.3 | -20.1 | 9.8  |
|                |            |       |    | LHI57_6         | M1        | 4.25        | 0.9        | 46.9 | 16.8 | 3.3 | -19.7 | 8.9  |
|                |            |       |    | LHI57_7         | M1        | 4.75        | 0.5        | 41.0 | 14.4 | 3.3 | -19.9 | 9.1  |
|                |            |       |    | LHI57_8         | M1        | 5.25        | 0.8        | 43.7 | 15.6 | 3.3 | -19.6 | 9.3  |
|                |            |       |    | LHI57_9         | M1        | 5.75        | 0.8        | 43.2 | 15.3 | 3.3 | -19.4 | 9.3  |
|                |            |       |    | <i>LHI57_10</i> | <i>M1</i> | <i>6.25</i> | <i>0.0</i> |      |      |     |       |      |
|                |            |       |    | LHI57_11        | M1        | 6.75        | 0.7        | 44.2 | 15.6 | 3.3 | -19.5 | 9.7  |
|                |            |       |    | LHI57_12        | M1        | 7.50        | 0.6        | 42.4 | 15.1 | 3.3 | -19.5 | 9.9  |
|                |            |       |    | LHI57_13        | M1        | 8.50        | 0.6        | 43.1 | 15.1 | 3.3 | -19.9 | 9.6  |
|                |            |       |    | LHI57_14        | M1        | 9.50        | 0.5        | 42.0 | 14.8 | 3.3 | -19.6 | 9.6  |
|                |            |       |    | LHI57_15        | M2        | 3.19        | 1.1        | 44.6 | 16.2 | 3.2 | -19.7 | 8.7  |
|                |            |       |    | LHI57_16        | M2        | 4.56        | 1.0        | 45.9 | 16.5 | 3.2 | -19.9 | 8.7  |
|                |            |       |    | LHI57_17        | M2        | 5.94        | 1.1        | 49.3 | 18.0 | 3.2 | -19.2 | 9.3  |
|                |            |       |    | LHI57_18        | M2        | 7.31        | 1.1        | 50.5 | 18.4 | 3.2 | -19.3 | 9.3  |
|                |            |       |    | LHI57_19        | M2        | 8.25        | 1.0        | 44.1 | 16.0 | 3.2 | -19.7 | 9.2  |
|                |            |       |    | LHI57_20        | M2        | 8.75        | 1.2        | 47.7 | 17.3 | 3.2 | -19.3 | 8.8  |
|                |            |       |    | LHI57_21        | M2        | 9.25        | 1.0        | 42.7 | 15.6 | 3.2 | -19.5 | 8.4  |
|                |            |       |    | LHI57_22        | M2        | 9.75        | 0.6        | 48.3 | 17.3 | 3.3 | -19.4 | 9.0  |
|                |            |       |    | LHI57_23        | M2        | 10.33       | 1.2        | 49.6 | 18.0 | 3.2 | -19.2 | 9.2  |
|                |            |       |    | LHI57_24        | M2        | 11.00       | 1.0        | 43.9 | 15.9 | 3.2 | -19.3 | 9.2  |
|                |            |       |    | LHI57_25        | M2        | 11.67       | 1.1        | 44.5 | 16.1 | 3.2 | -19.3 | 10.1 |

|                |              |       |   |                |           |             |            |             |             |            |              |            |
|----------------|--------------|-------|---|----------------|-----------|-------------|------------|-------------|-------------|------------|--------------|------------|
|                |              |       |   | LHI57_26       | M2        | 12.67       | 1.2        | 49.5        | 18.0        | 3.2        | -19.3        | 9.9        |
|                |              |       |   | LHI57_27       | M2        | 14.00       | 0.8        | 45.7        | 16.3        | 3.3        | -19.7        | 9.9        |
|                |              |       |   | LHI57_28       | M2        | 15.33       | 0.7        | 44.0        | 15.6        | 3.3        | -20.0        | 9.6        |
| 2. Los Husos I | LHI.D1.342.5 | 24-30 | M | LHI58_1        | M1        | 0.90        | 0.9        | 46.5        | 16.9        | 3.2        | -19.6        | 12.2       |
|                |              |       |   | LHI58_2        | M1        | 1.50        | 1.2        | 43.5        | 15.7        | 3.2        | -19.4        | 10.8       |
|                |              |       |   | LHI58_3        | M1        | 2.10        | 1.1        | 36.9        | 12.9        | 3.3        | -19.9        | 10.4       |
|                |              |       |   | LHI58_4        | M1        | 2.70        | 0.5        | 43.4        | 15.8        | 3.2        | -19.7        | 10.1       |
|                |              |       |   | LHI58_5        | M1        | 3.33        | 0.6        | 41.4        | 14.9        | 3.2        | -20.0        | 10.6       |
|                |              |       |   | LHI58_6        | M1        | 4.00        | 0.5        | 41.1        | 14.6        | 3.3        | -19.8        | 10.0       |
|                |              |       |   | <i>LHI58_7</i> | <i>M1</i> | <i>4.67</i> | <i>0.3</i> | <i>44.9</i> | <i>15.5</i> | <i>3.4</i> | <i>-19.6</i> | <i>8.9</i> |
|                |              |       |   | LHI58_8        | M1        | 6.00        | 0.6        | 43.7        | 15.4        | 3.3        | -19.9        | 9.9        |
|                |              |       |   | <i>LHI58_9</i> | <i>M1</i> | <i>8.50</i> | <i>0.4</i> | <i>43.0</i> | <i>14.4</i> | <i>3.5</i> | <i>-20.0</i> | <i>9.6</i> |
|                |              |       |   | LHI58_10       | M2        | 3.19        | 0.7        | 44.5        | 16.2        | 3.2        | -20.0        | 10.2       |
|                |              |       |   | LHI58_11       | M2        | 4.56        | 0.8        | 47.1        | 17.0        | 3.2        | -19.7        | 10.2       |
|                |              |       |   | LHI58_12       | M2        | 5.94        | 1.2        | 46.1        | 16.8        | 3.2        | -19.6        | 9.9        |
|                |              |       |   | LHI58_13       | M2        | 7.31        | 1.0        | 44.1        | 16.0        | 3.2        | -20.1        | 9.7        |
|                |              |       |   | LHI58_14       | M2        | 8.33        | 1.2        | 50.6        | 18.4        | 3.2        | -19.4        | 10.3       |
|                |              |       |   | LHI58_15       | M2        | 9.00        | 1.2        | 45.4        | 16.5        | 3.2        | -19.4        | 10.1       |
|                |              |       |   | LHI58_16       | M2        | 9.67        | 0.8        | 45.8        | 16.5        | 3.2        | -19.8        | 9.8        |
|                |              |       |   | LHI58_17       | M2        | 10.33       | 1.1        | 48.1        | 17.4        | 3.2        | -19.7        | 10.0       |
|                |              |       |   | LHI58_18       | M2        | 11.00       | 0.7        | 43.7        | 15.7        | 3.2        | -19.9        | 9.4        |
|                |              |       |   | LHI58_19       | M2        | 11.67       | 0.5        | 47.6        | 17.0        | 3.3        | -19.6        | 9.6        |
|                |              |       |   | LHI58_20       | M2        | 12.67       | 0.9        | 45.3        | 16.3        | 3.2        | -19.7        | 9.3        |
|                |              |       |   | LHI58_21       | M2        | 14.00       | 0.5        | 47.5        | 17.0        | 3.3        | -19.3        | 9.7        |
|                |              |       |   | LHI58_22       | M2        | 15.33       | 0.7        | 44.3        | 15.8        | 3.3        | -19.6        | 9.6        |

|                |                 |        |    |                 |           |              |            |             |             |            |              |             |
|----------------|-----------------|--------|----|-----------------|-----------|--------------|------------|-------------|-------------|------------|--------------|-------------|
| 2. Los Husos I | LHI.A4.282      | ca. 15 | F  | LHI62_1         | M1        | 0.50         | 0.5        | 43.9        | 15.7        | 3.3        | -19.0        | 13.3        |
|                |                 |        |    | LHI62_2         | M1        | 2.00         | 0.6        | 42.8        | 14.9        | 3.3        | -19.4        | 11.6        |
|                |                 |        |    | LHI62_3         | M1        | 3.20         | 0.4        | 40.4        | 14.3        | 3.3        | -19.8        | 9.8         |
|                |                 |        |    | LHI62_4         | M1        | 3.60         | 0.5        | 41.2        | 14.1        | 3.4        | -19.6        | 9.6         |
|                |                 |        |    | <i>LHI62_5</i>  | <i>M1</i> | <i>4.00</i>  | <i>0.5</i> | <i>41.0</i> | <i>13.9</i> | <i>3.5</i> | <i>-19.6</i> | <i>9.2</i>  |
|                |                 |        |    | LHI62_6         | M1        | 4.60         | 0.8        | 43.4        | 15.2        | 3.3        | -19.5        | 9.5         |
|                |                 |        |    | LHI62_7         | M1        | 5.33         | 0.6        | 43.2        | 14.7        | 3.4        | -19.6        | 9.7         |
|                |                 |        |    | LHI62_8         | M1        | 6.33         | 0.6        | 41.7        | 14.4        | 3.4        | -19.5        | 10.2        |
|                |                 |        |    | <i>LHI62_9</i>  | <i>M1</i> | <i>7.50</i>  | <i>0.3</i> | <i>42.3</i> | <i>14.1</i> | <i>3.5</i> | <i>-19.7</i> | <i>9.6</i>  |
|                |                 |        |    | <i>LHI62_10</i> | <i>M1</i> | <i>9.00</i>  | <i>0.4</i> | <i>44.9</i> | <i>14.8</i> | <i>3.5</i> | <i>-19.7</i> | <i>10.0</i> |
|                |                 |        |    | LHI62_11        | M2        | 3.19         | 1.0        | 43.0        | 15.7        | 3.2        | -19.5        | 10.4        |
|                |                 |        |    | LHI62_12        | M2        | 4.56         | 1.0        | 51.0        | 18.2        | 3.3        | -19.3        | 10.3        |
|                |                 |        |    | LHI62_13        | M2        | 5.94         | 0.9        | 44.2        | 15.7        | 3.3        | -19.5        | 10.1        |
|                |                 |        |    | LHI62_14        | M2        | 7.31         | 0.8        | 44.5        | 15.5        | 3.4        | -19.6        | 10.1        |
|                |                 |        |    | LHI62_15        | M2        | 8.25         | 0.6        | 43.5        | 14.7        | 3.4        | -19.3        | 10.3        |
|                |                 |        |    | <i>LHI62_16</i> | <i>M2</i> | <i>8.75</i>  | <i>0.5</i> | <i>45.4</i> | <i>15.2</i> | <i>3.5</i> | <i>-19.4</i> | <i>9.7</i>  |
|                |                 |        |    | <i>LHI62_17</i> | <i>M2</i> | <i>9.25</i>  | <i>0.6</i> | <i>45.1</i> | <i>15.1</i> | <i>3.5</i> | <i>-19.4</i> | <i>9.7</i>  |
|                |                 |        |    | LHI62_18        | M2        | 9.75         | 0.6        | 41.2        | 13.9        | 3.5        | -19.3        | 10.0        |
|                |                 |        |    | <i>LHI62_19</i> | <i>M2</i> | <i>10.50</i> | <i>0.5</i> | <i>42.7</i> | <i>14.4</i> | <i>3.5</i> | <i>-19.5</i> | <i>9.9</i>  |
|                |                 |        |    | LHI62_20        | M2        | 11.50        | 0.6        | 41.5        | 14.1        | 3.4        | -19.4        | 10.1        |
|                |                 |        |    | LHI62_21        | M2        | 14.00        | 0.6        | 42.1        | 14.4        | 3.4        | -19.4        | 10.5        |
| 3. Peña Larga  | CPL.50365-50366 | 20-30  | F? | CPL5_1          | M1        | 0.90         | 0.7        | 43.5        | 15.5        | 3.3        | -19.6        | 11.0        |
|                |                 |        |    | CPL5_2          | M1        | 1.50         | 0.8        | 43.2        | 15.4        | 3.3        | -19.7        | 10.6        |
|                |                 |        |    | CPL5_3          | M1        | 2.10         | 0.8        | 44.4        | 15.9        | 3.2        | -19.8        | 10.0        |
|                |                 |        |    | CPL5_4          | M1        | 2.70         | 1.0        | 45.6        | 16.3        | 3.3        | -19.8        | 10.1        |



|                       |         |       |   |          |    |       |     |      |      |     |       |      |
|-----------------------|---------|-------|---|----------|----|-------|-----|------|------|-----|-------|------|
|                       |         |       |   | CPL5_5   | M1 | 3.33  | 1.0 | 44.7 | 15.9 | 3.3 | -20.1 | 9.7  |
|                       |         |       |   | CPL5_6   | M1 | 4.00  | 0.6 | 43.8 | 15.6 | 3.3 | -20.1 | 10.0 |
|                       |         |       |   | CPL5_7   | M1 | 4.67  | 0.6 | 43.9 | 15.8 | 3.2 | -20.1 | 9.9  |
|                       |         |       |   | CPL5_8   | M1 | 5.33  | 0.4 | 43.6 | 15.2 | 3.3 | -20.4 | 9.5  |
|                       |         |       |   | CPL5_9   | M1 | 6.33  | 0.7 | 46.5 | 16.6 | 3.3 | -20.3 | 9.8  |
|                       |         |       |   | CPL5_10  | M1 | 8.50  | 0.8 | 42.5 | 14.8 | 3.4 | -20.1 | 9.6  |
|                       |         |       |   | CPL5_11  | M2 | 4.15  | 0.7 | 46.6 | 16.9 | 3.2 | -20.2 | 9.7  |
|                       |         |       |   | CPL5_12  | M2 | 5.25  | 0.7 | 46.6 | 16.7 | 3.3 | -20.6 | 9.3  |
|                       |         |       |   | CPL5_13  | M2 | 6.35  | 0.8 | 46.7 | 16.9 | 3.2 | -20.4 | 9.3  |
|                       |         |       |   | CPL5_14  | M2 | 7.45  | 1.1 | 46.0 | 16.6 | 3.2 | -20.3 | 10.0 |
|                       |         |       |   | CPL5_15  | M2 | 8.25  | 0.9 | 46.3 | 16.6 | 3.3 | -19.8 | 9.7  |
|                       |         |       |   | CPL5_16  | M2 | 8.75  | 0.9 | 48.2 | 17.3 | 3.3 | -19.8 | 9.7  |
|                       |         |       |   | CPL5_17  | M2 | 9.25  | 0.7 | 52.4 | 18.8 | 3.3 | -20.4 | 9.5  |
|                       |         |       |   | CPL5_18  | M2 | 9.75  | 1.0 | 44.0 | 15.9 | 3.2 | -20.4 | 10.2 |
|                       |         |       |   | CPL5_19  | M2 | 10.33 | 1.1 | 47.7 | 17.2 | 3.2 | -20.3 | 10.1 |
|                       |         |       |   | CPL5_20  | M2 | 11.00 | 0.9 | 46.5 | 16.6 | 3.3 | -20.3 | 10.3 |
|                       |         |       |   | CPL5_21  | M2 | 11.67 | 0.8 | 44.1 | 15.8 | 3.3 | -20.2 | 10.1 |
|                       |         |       |   | CPL5_22  | M2 | 13.00 | 1.0 | 47.0 | 16.7 | 3.3 | -19.8 | 10.5 |
|                       |         |       |   | CPL5_23  | M2 | 15.00 | 1.2 | 45.8 | 16.4 | 3.3 | -19.7 | 10.6 |
| 4. Alto de la Huesera | AH.2111 | 35-40 | F | LHUE34_1 | M1 | 0.30  | 0.5 | 39.6 | 14.1 | 3.3 | -19.3 | 12.2 |
|                       |         |       |   | LHUE34_2 | M1 | 0.90  | 0.4 | 39.5 | 14.1 | 3.3 | -19.0 | 12.4 |
|                       |         |       |   | LHUE34_3 | M1 | 1.50  | 0.6 | 40.1 | 14.5 | 3.2 | -19.0 | 12.4 |
|                       |         |       |   | LHUE34_4 | M1 | 2.10  | 0.8 | 40.6 | 14.7 | 3.2 | -19.0 | 12.1 |
|                       |         |       |   | LHUE34_5 | M1 | 2.70  | 0.7 | 40.2 | 14.5 | 3.2 | -19.3 | 11.5 |
|                       |         |       |   | LHUE34_6 | M1 | 3.17  | 0.7 | 40.9 | 14.7 | 3.2 | -19.8 | 9.9  |

|                       |         |       |   |                  |           |             |            |             |             |            |              |             |
|-----------------------|---------|-------|---|------------------|-----------|-------------|------------|-------------|-------------|------------|--------------|-------------|
|                       |         |       |   | LHUE34_7         | M1        | 3.50        | 0.4        | 41.5        | 15.0        | 3.2        | -19.9        | 9.1         |
|                       |         |       |   | LHUE34_8         | M1        | 3.83        | 0.6        | 40.4        | 14.6        | 3.2        | -19.4        | 9.4         |
|                       |         |       |   | LHUE34_9         | M1        | 4.16        | 0.6        | 40.3        | 14.6        | 3.2        | -19.5        | 8.9         |
|                       |         |       |   | LHUE34_10        | M1        | 4.49        | 1.0        | 40.8        | 14.7        | 3.2        | -19.3        | 8.8         |
|                       |         |       |   | LHUE34_11        | M1        | 4.82        | 0.5        | 39.9        | 14.2        | 3.3        | -19.3        | 7.9         |
|                       |         |       |   | LHUE34_12        | M1        | 5.33        | 0.7        | 41.1        | 14.8        | 3.2        | -19.4        | 8.1         |
|                       |         |       |   | LHUE34_13        | M1        | 6.00        | 0.5        | 39.7        | 14.2        | 3.3        | -19.3        | 8.2         |
|                       |         |       |   | LHUE34_14        | M1        | 6.67        | 0.7        | 39.8        | 14.4        | 3.2        | -19.4        | 8.6         |
|                       |         |       |   | LHUE34_15        | M1        | 7.38        | 0.8        | 40.0        | 14.4        | 3.2        | -19.2        | 8.6         |
|                       |         |       |   | LHUE34_16        | M1        | 8.13        | 0.7        | 41.3        | 14.8        | 3.3        | -19.1        | 9.0         |
|                       |         |       |   | LHUE34_17        | M1        | 8.88        | 1.2        | 43.4        | 15.8        | 3.2        | -19.0        | 9.7         |
|                       |         |       |   | <i>LHUE34_18</i> | <i>M1</i> | <i>9.63</i> | <i>0.9</i> | <i>19.3</i> | <i>6.7</i>  | <i>3.4</i> | <i>-19.4</i> | <i>8.2</i>  |
|                       |         |       |   | LHUE34_19        | M2        | 4.15        | 0.9        | 44.0        | 15.9        | 3.2        | -19.6        | 9.3         |
|                       |         |       |   | LHUE34_20        | M2        | 5.25        | 1.0        | 33.7        | 12.0        | 3.3        | -19.9        | 8.1         |
|                       |         |       |   | LHUE34_21        | M2        | 6.35        | 1.1        | 42.7        | 15.5        | 3.2        | -19.5        | 8.6         |
|                       |         |       |   | LHUE34_22        | M2        | 7.45        | 1.1        | 39.9        | 14.4        | 3.2        | -19.1        | 9.1         |
|                       |         |       |   | LHUE34_23        | M2        | 8.33        | 1.1        | 36.1        | 12.9        | 3.3        | -19.6        | 9.3         |
|                       |         |       |   | LHUE34_24        | M2        | 9.00        | 0.7        | 43.8        | 15.5        | 3.3        | -19.9        | 9.4         |
|                       |         |       |   | LHUE34_25        | M2        | 9.67        | 0.5        | 43.5        | 15.5        | 3.3        | -19.2        | 8.8         |
|                       |         |       |   | LHUE34_26        | M2        | 10.50       | 0.5        | 42.8        | 15.3        | 3.3        | -18.8        | 8.7         |
|                       |         |       |   | LHUE34_27        | M2        | 11.50       | 0.6        | 48.3        | 17.7        | 3.2        | -18.5        | 9.5         |
|                       |         |       |   | LHUE34_28        | M2        | 14.00       | 0.8        | 42.9        | 15.3        | 3.3        | -19.2        | 9.3         |
| 4. Alto de la Huesera | AH.2157 | 30-35 | F | <i>LHUE36_1</i>  | <i>M1</i> | <i>0.50</i> | <i>0.3</i> | <i>41.1</i> | <i>14.3</i> | <i>3.3</i> | <i>-19.7</i> | <i>12.6</i> |
|                       |         |       |   | LHUE36_2         | M1        | 1.50        | 0.6        | 42.6        | 15.2        | 3.3        | -19.3        | 13.6        |
|                       |         |       |   | LHUE36_3         | M1        | 2.50        | 0.4        | 39.3        | 13.4        | 3.4        | -19.5        | 12.3        |

|                       |         |       |    |                 |           |             |            |             |             |            |              |            |
|-----------------------|---------|-------|----|-----------------|-----------|-------------|------------|-------------|-------------|------------|--------------|------------|
|                       |         |       |    | LHUE36_4        | M1        | 3.17        | 0.4        | 40.2        | 14.1        | 3.3        | -19.6        | 10.3       |
|                       |         |       |    | LHUE36_5        | M1        | 3.50        | 1.0        | 40.6        | 14.3        | 3.3        | -19.8        | 10.2       |
|                       |         |       |    | <i>LHUE36_6</i> | <i>M1</i> | <i>3.83</i> | <i>0.2</i> | <i>40.4</i> | <i>12.4</i> | <i>3.8</i> | <i>-20.3</i> | <i>7.1</i> |
|                       |         |       |    | LHUE36_7        | M1        | 4.16        | 0.8        | 41.4        | 14.7        | 3.3        | -19.7        | 10.2       |
|                       |         |       |    | LHUE36_8        | M1        | 4.49        | 0.4        | 40.1        | 13.9        | 3.4        | -19.3        | 9.4        |
|                       |         |       |    | LHUE36_9        | M1        | 4.82        | 0.7        | 41.6        | 14.6        | 3.3        | -19.3        | 10.2       |
|                       |         |       |    | LHUE36_10       | M1        | 5.33        | 0.4        | 39.6        | 13.7        | 3.4        | -19.4        | 10.3       |
|                       |         |       |    | LHUE36_11       | M1        | 6.00        | 0.6        | 41.0        | 14.4        | 3.3        | -19.3        | 10.8       |
|                       |         |       |    | LHUE36_12       | M1        | 8.50        | 0.6        | 45.8        | 16.2        | 3.3        | -19.6        | 11.2       |
|                       |         |       |    | LHUE36_13       | M2        | 3.42        | 0.8        | 43.7        | 15.7        | 3.3        | -20.0        | 10.0       |
|                       |         |       |    | LHUE36_14       | M2        | 5.25        | 0.6        | 41.1        | 15.0        | 3.2        | -19.1        | 9.9        |
|                       |         |       |    | LHUE36_15       | M2        | 7.08        | 1.1        | 42.1        | 15.2        | 3.2        | -19.5        | 10.0       |
|                       |         |       |    | LHUE36_16       | M2        | 8.25        | 1.2        | 53.1        | 19.5        | 3.2        | -18.6        | 10.3       |
|                       |         |       |    | LHUE36_17       | M2        | 8.75        | 1.2        | 58.2        | 21.5        | 3.2        | -19.0        | 10.4       |
|                       |         |       |    | LHUE36_18       | M2        | 9.25        | 1.1        | 42.4        | 15.3        | 3.2        | -19.6        | 9.8        |
|                       |         |       |    | LHUE36_19       | M2        | 9.75        | 1.1        | 38.3        | 13.8        | 3.2        | -19.8        | 9.8        |
|                       |         |       |    | LHUE36_20       | M2        | 10.33       | 1.1        | 52.2        | 19.1        | 3.2        | -19.5        | 10.1       |
|                       |         |       |    | LHUE36_21       | M2        | 11.00       | 1.2        | 56.1        | 20.6        | 3.2        | -19.4        | 10.1       |
|                       |         |       |    | LHUE36_22       | M2        | 11.67       | 1.1        | 50.2        | 18.4        | 3.2        | -19.6        | 10.4       |
|                       |         |       |    | LHUE36_23       | M2        | 13.00       | 0.8        | 43.3        | 15.5        | 3.3        | -19.9        | 10.3       |
|                       |         |       |    | LHUE36_24       | M2        | 15.00       | 0.6        | 41.9        | 15.0        | 3.3        | -19.5        | 11.1       |
| 4. Alto de la Huesera | AH.2170 | 24-30 | F? | LHUE52_1        | M1        | 1.13        | 0.8        | 33.0        | 11.6        | 3.3        | -19.9        | 12.0       |
|                       |         |       |    | LHUE52_2        | M1        | 1.88        | 1.0        | 42.6        | 15.4        | 3.2        | -19.6        | 11.9       |
|                       |         |       |    | LHUE52_3        | M1        | 2.63        | 1.0        | 42.8        | 15.4        | 3.2        | -19.8        | 9.9        |
|                       |         |       |    | LHUE52_4        | M1        | 3.20        | 0.5        | 41.1        | 14.5        | 3.3        | -19.7        | 9.2        |

|                       |         |       |   |                  |           |             |            |             |             |            |              |            |
|-----------------------|---------|-------|---|------------------|-----------|-------------|------------|-------------|-------------|------------|--------------|------------|
|                       |         |       |   | LHUE52_5         | M1        | 3.60        | 0.8        | 45.4        | 16.5        | 3.2        | -19.9        | 9.1        |
|                       |         |       |   | LHUE52_6         | M1        | 4.00        | 0.8        | 42.1        | 15.2        | 3.2        | -19.2        | 9.2        |
|                       |         |       |   | LHUE52_7         | M1        | 4.40        | 1.1        | 40.6        | 14.6        | 3.2        | -19.1        | 9.5        |
|                       |         |       |   | LHUE52_8         | M1        | 4.80        | 1.1        | 40.3        | 14.5        | 3.2        | -19.2        | 9.2        |
|                       |         |       |   | LHUE52_9         | M1        | 5.33        | 0.8        | 44.3        | 16.0        | 3.2        | -19.2        | 9.6        |
|                       |         |       |   | LHUE52_10        | M1        | 6.00        | 0.7        | 43.3        | 15.7        | 3.2        | -19.1        | 10.0       |
|                       |         |       |   | LHUE52_11        | M1        | 6.67        | 0.5        | 43.3        | 15.4        | 3.3        | -19.6        | 9.5        |
|                       |         |       |   | <i>LHUE52_12</i> | <i>M1</i> | <i>7.75</i> | <i>0.4</i> | <i>43.0</i> | <i>14.3</i> | <i>3.5</i> | <i>-19.9</i> | <i>8.1</i> |
|                       |         |       |   | <i>LHUE52_13</i> | <i>M1</i> | <i>9.25</i> | <i>0.3</i> | <i>45.1</i> | <i>14.5</i> | <i>3.6</i> | <i>-19.7</i> | <i>8.1</i> |
|                       |         |       |   | LHUE52_14        | M2        | 3.19        | 0.7        | 40.2        | 14.6        | 3.2        | -19.9        | 9.6        |
|                       |         |       |   | LHUE52_15        | M2        | 4.56        | 1.0        | 43.3        | 15.8        | 3.2        | -19.4        | 9.4        |
|                       |         |       |   | LHUE52_16        | M2        | 5.94        | 1.1        | 43.6        | 16.0        | 3.2        | -19.2        | 9.6        |
|                       |         |       |   | LHUE52_17        | M2        | 7.31        | 1.1        | 48.0        | 17.5        | 3.2        | -19.4        | 9.3        |
|                       |         |       |   | LHUE52_18        | M2        | 8.33        | 1.0        | 42.0        | 15.3        | 3.2        | -19.8        | 9.0        |
|                       |         |       |   | LHUE52_19        | M2        | 9.00        | 1.1        | 49.7        | 18.2        | 3.2        | -19.8        | 8.4        |
|                       |         |       |   | LHUE52_20        | M2        | 9.67        | 1.1        | 47.1        | 17.2        | 3.2        | -19.5        | 8.3        |
|                       |         |       |   | LHUE52_21        | M2        | 10.33       | 1.1        | 47.6        | 17.4        | 3.2        | -19.2        | 8.8        |
|                       |         |       |   | LHUE52_22        | M2        | 11.00       | 1.0        | 42.6        | 15.6        | 3.2        | -19.4        | 9.4        |
|                       |         |       |   | LHUE52_23        | M2        | 11.67       | 1.1        | 45.8        | 16.7        | 3.2        | -19.4        | 9.2        |
|                       |         |       |   | LHUE52_24        | M2        | 13.00       | 1.1        | 45.3        | 16.5        | 3.2        | -19.5        | 9.1        |
|                       |         |       |   | LHUE52_25        | M2        | 15.00       | 0.7        | 41.9        | 15.2        | 3.2        | -19.3        | 9.3        |
| 4. Alto de la Huesera | AH.2169 | 45-55 | M | LHUE53_1         | M1        | 1.13        | 0.8        | 44.9        | 16.2        | 3.2        | -19.0        | 12.9       |
|                       |         |       |   | LHUE53_2         | M1        | 1.88        | 0.8        | 43.5        | 15.7        | 3.2        | -19.3        | 12.7       |
|                       |         |       |   | LHUE53_3         | M1        | 2.63        | 0.8        | 42.8        | 15.6        | 3.2        | -19.4        | 11.7       |
|                       |         |       |   | LHUE53_4         | M1        | 3.25        | 1.0        | 43.3        | 15.7        | 3.2        | -20.0        | 9.7        |

|                       |         |       |   |           |    |       |     |      |      |     |       |      |
|-----------------------|---------|-------|---|-----------|----|-------|-----|------|------|-----|-------|------|
|                       |         |       |   | LHUE53_5  | M1 | 3.75  | 1.0 | 42.7 | 15.5 | 3.2 | -19.9 | 8.9  |
|                       |         |       |   | LHUE53_6  | M1 | 4.25  | 1.2 | 40.5 | 14.7 | 3.2 | -19.7 | 9.1  |
|                       |         |       |   | LHUE53_7  | M1 | 4.75  | 1.1 | 40.6 | 14.6 | 3.2 | -19.8 | 9.2  |
|                       |         |       |   | LHUE53_8  | M1 | 5.33  | 0.9 | 41.3 | 14.8 | 3.3 | -19.7 | 9.4  |
|                       |         |       |   | LHUE53_9  | M1 | 6.00  | 1.1 | 48.3 | 17.5 | 3.2 | -19.4 | 9.9  |
|                       |         |       |   | LHUE53_10 | M1 | 6.67  | 0.7 | 33.1 | 11.6 | 3.3 | -19.8 | 9.2  |
|                       |         |       |   | LHUE53_11 | M1 | 7.50  | 0.8 | 30.2 | 10.6 | 3.3 | -19.9 | 9.1  |
|                       |         |       |   | LHUE53_12 | M1 | 8.50  | 1.1 | 42.4 | 15.2 | 3.2 | -19.7 | 9.5  |
|                       |         |       |   | LHUE53_13 | M1 | 9.50  | 1.1 | 43.7 | 15.8 | 3.2 | -19.6 | 10.0 |
|                       |         |       |   | LHUE53_14 | M2 | 4.56  | 0.5 | 35.7 | 12.9 | 3.2 | -19.9 | 8.9  |
|                       |         |       |   | LHUE53_15 | M2 | 5.94  | 1.1 | 48.3 | 17.6 | 3.2 | -19.8 | 8.7  |
|                       |         |       |   | LHUE53_16 | M2 | 7.31  | 1.0 | 41.2 | 15.0 | 3.2 | -20.0 | 8.6  |
|                       |         |       |   | LHUE53_17 | M2 | 8.25  | 1.0 | 42.2 | 15.4 | 3.2 | -19.7 | 8.7  |
|                       |         |       |   | LHUE53_18 | M2 | 8.75  | 1.1 | 44.2 | 16.1 | 3.2 | -19.5 | 8.8  |
|                       |         |       |   | LHUE53_19 | M2 | 9.25  | 1.1 | 43.0 | 15.7 | 3.2 | -19.6 | 9.1  |
|                       |         |       |   | LHUE53_20 | M2 | 9.75  | 1.1 | 43.5 | 15.8 | 3.2 | -19.6 | 9.3  |
|                       |         |       |   | LHUE53_21 | M2 | 10.33 | 1.0 | 42.7 | 15.6 | 3.2 | -19.7 | 9.4  |
|                       |         |       |   | LHUE53_22 | M2 | 11.00 | 1.1 | 46.9 | 17.1 | 3.2 | -19.4 | 9.5  |
|                       |         |       |   | LHUE53_23 | M2 | 11.67 | 1.1 | 47.0 | 17.1 | 3.2 | -19.5 | 9.4  |
|                       |         |       |   | LHUE53_24 | M2 | 13.00 | 0.8 | 42.2 | 15.3 | 3.2 | -19.6 | 9.7  |
|                       |         |       |   | LHUE53_25 | M2 | 15.00 | 0.8 | 39.8 | 14.4 | 3.2 | -19.5 | 10.1 |
| 4. Alto de la Huesera | AH.2075 | 24-30 | M | LHUE2i_1  | M1 | 1.13  | 0.4 | 40.5 | 13.8 | 3.4 | -19.4 | 9.8  |
|                       |         |       |   | LHUE2i_2  | M1 | 1.88  | 0.6 | 41.8 | 14.9 | 3.3 | -19.6 | 9.3  |
|                       |         |       |   | LHUE2i_3  | M1 | 2.63  | 0.7 | 46.3 | 16.5 | 3.3 | -19.7 | 9.0  |
|                       |         |       |   | LHUE2i_4  | M1 | 3.33  | 0.5 | 46.8 | 16.5 | 3.3 | -19.7 | 8.4  |

|                       |           |       |   |                  |           |             |            |             |             |            |              |            |
|-----------------------|-----------|-------|---|------------------|-----------|-------------|------------|-------------|-------------|------------|--------------|------------|
|                       |           |       |   | LHUE2i_5         | M1        | 4.00        | 1.0        | 40.8        | 14.7        | 3.2        | -19.7        | 9.0        |
|                       |           |       |   | LHUE2i_6         | M1        | 4.67        | 0.7        | 45.9        | 16.4        | 3.3        | -19.3        | 9.8        |
|                       |           |       |   | LHUE2i_7         | M1        | 5.50        | 0.6        | 42.3        | 14.8        | 3.3        | -19.2        | 9.1        |
|                       |           |       |   | LHUE2i_8         | M1        | 6.50        | 0.6        | 41.7        | 14.7        | 3.3        | -19.3        | 9.5        |
|                       |           |       |   | LHUE2i_9         | M1        | 7.75        | 0.9        | 39.4        | 13.9        | 3.3        | -19.5        | 9.2        |
|                       |           |       |   | LHUE2i_10        | M1        | 9.25        | 0.5        | 42.0        | 14.4        | 3.4        | -19.2        | 9.0        |
|                       |           |       |   | <i>LHUE2i_11</i> | <i>M2</i> | <i>3.42</i> | <i>0.3</i> | <i>41.3</i> | <i>14.8</i> | <i>3.2</i> | <i>-20.1</i> | <i>8.6</i> |
|                       |           |       |   | LHUE2i_12        | M2        | 5.25        | 0.6        | 42.8        | 15.3        | 3.3        | -19.6        | 8.9        |
|                       |           |       |   | LHUE2i_13        | M2        | 7.08        | 0.5        | 42.3        | 15.1        | 3.3        | -19.8        | 9.0        |
|                       |           |       |   | LHUE2i_14        | M2        | 8.33        | 0.9        | 42.8        | 15.4        | 3.3        | -19.7        | 9.2        |
|                       |           |       |   | LHUE2i_15        | M2        | 9.00        | 1.0        | 40.3        | 14.4        | 3.3        | -19.6        | 9.3        |
|                       |           |       |   | LHUE2i_16        | M2        | 9.67        | 0.9        | 43.1        | 15.6        | 3.2        | -19.0        | 9.7        |
|                       |           |       |   | LHUE2i_17        | M2        | 10.33       | 1.0        | 41.9        | 15.2        | 3.2        | -19.0        | 10.0       |
|                       |           |       |   | LHUE2i_18        | M2        | 11.00       | 0.9        | 44.0        | 15.9        | 3.2        | -19.0        | 10.0       |
|                       |           |       |   | LHUE2i_19        | M2        | 11.67       | 0.7        | 39.1        | 14.2        | 3.2        | -19.0        | 10.3       |
|                       |           |       |   | LHUE2i_20        | M2        | 13.00       | 0.9        | 41.6        | 15.1        | 3.2        | -18.6        | 9.7        |
|                       |           |       |   | LHUE2i_21        | M2        | 15.00       | 0.7        | 41.3        | 14.9        | 3.2        | -19.0        | 9.6        |
| 4. Alto de la Huesera | AH.2383.2 | 40-45 | M | LHUE17c_1        | M1        | 0.75        | 0.8        | 41.6        | 15.1        | 3.2        | -18.9        | 11.8       |
|                       |           |       |   | LHUE17c_2        | M1        | 1.25        | 0.8        | 41.3        | 14.9        | 3.2        | -19.2        | 10.3       |
|                       |           |       |   | LHUE17c_3        | M1        | 1.75        | 0.9        | 40.8        | 14.8        | 3.2        | -19.6        | 9.3        |
|                       |           |       |   | LHUE17c_4        | M1        | 2.25        | 0.5        | 40.4        | 14.5        | 3.3        | -19.3        | 8.6        |
|                       |           |       |   | LHUE17c_5        | M1        | 2.75        | 0.6        | 40.9        | 14.7        | 3.3        | -19.6        | 9.0        |
|                       |           |       |   | LHUE17c_6        | M1        | 3.20        | 1.1        | 44.3        | 16.1        | 3.2        | -19.5        | 9.4        |
|                       |           |       |   | LHUE17c_7        | M1        | 3.60        | 0.7        | 40.7        | 14.6        | 3.3        | -19.5        | 8.4        |
|                       |           |       |   | LHUE17c_8        | M1        | 4.00        | 1.2        | 45.3        | 16.3        | 3.2        | -19.5        | 9.1        |

|                       |           |       |   |            |    |       |     |      |      |     |       |      |
|-----------------------|-----------|-------|---|------------|----|-------|-----|------|------|-----|-------|------|
|                       |           |       |   | LHUE17c_9  | M1 | 4.40  | 1.1 | 43.0 | 15.6 | 3.2 | -19.5 | 8.9  |
|                       |           |       |   | LHUE17c_10 | M1 | 4.80  | 1.1 | 39.8 | 14.4 | 3.2 | -19.7 | 9.0  |
|                       |           |       |   | LHUE17c_11 | M1 | 5.33  | 1.1 | 43.5 | 15.8 | 3.2 | -19.4 | 9.1  |
|                       |           |       |   | LHUE17c_12 | M1 | 6.00  | 1.0 | 40.8 | 14.7 | 3.2 | -19.4 | 9.3  |
|                       |           |       |   | LHUE17c_13 | M1 | 6.67  | 1.0 | 41.3 | 14.9 | 3.2 | -19.5 | 9.7  |
|                       |           |       |   | LHUE17c_14 | M1 | 7.50  | 1.1 | 43.5 | 15.7 | 3.2 | -19.3 | 10.3 |
|                       |           |       |   | LHUE17c_15 | M1 | 8.50  | 1.0 | 41.1 | 14.8 | 3.2 | -19.5 | 9.8  |
|                       |           |       |   | LHUE17c_16 | M1 | 9.50  | 0.6 | 40.6 | 14.5 | 3.3 | -19.4 | 9.8  |
|                       |           |       |   | LHUE17c_17 | M2 | 4.56  | 0.9 | 43.2 | 15.6 | 3.2 | -19.7 | 8.9  |
|                       |           |       |   | LHUE17c_18 | M2 | 5.94  | 1.1 | 58.8 | 21.6 | 3.2 | -19.2 | 8.9  |
|                       |           |       |   | LHUE17c_19 | M2 | 7.31  | 1.2 | 49.1 | 17.9 | 3.2 | -19.5 | 9.2  |
|                       |           |       |   | LHUE17c_20 | M2 | 8.33  | 1.2 | 55.5 | 20.4 | 3.2 | -19.2 | 10.2 |
|                       |           |       |   | LHUE17c_21 | M2 | 9.00  | 1.2 | 49.8 | 18.2 | 3.2 | -19.3 | 9.8  |
|                       |           |       |   | LHUE17c_22 | M2 | 9.67  | 0.8 | 42.8 | 15.4 | 3.3 | -19.5 | 8.3  |
|                       |           |       |   | LHUE17c_23 | M2 | 10.50 | 0.6 | 45.3 | 16.5 | 3.2 | -19.0 | 9.0  |
|                       |           |       |   | LHUE17c_24 | M2 | 11.50 | 0.6 | 42.5 | 15.4 | 3.2 | -18.9 | 8.8  |
|                       |           |       |   | LHUE17c_25 | M2 | 13.00 | 0.6 | 43.2 | 15.7 | 3.2 | -18.6 | 9.1  |
|                       |           |       |   | LHUE17c_26 | M2 | 15.00 | 0.6 | 42.9 | 15.3 | 3.3 | -18.8 | 9.6  |
| 4. Alto de la Huesera | AH.2386.2 | 40-55 | M | LHUE19c_1  | M1 | 0.90  | 0.9 | 40.9 | 14.8 | 3.2 | -19.3 | 12.3 |
|                       |           |       |   | LHUE19c_2  | M1 | 1.50  | 1.1 | 41.2 | 14.9 | 3.2 | -20.1 | 10.0 |
|                       |           |       |   | LHUE19c_3  | M1 | 2.10  | 0.7 | 41.3 | 14.9 | 3.2 | -19.4 | 9.1  |
|                       |           |       |   | LHUE19c_4  | M1 | 2.70  | 0.5 | 40.0 | 14.2 | 3.3 | -19.1 | 8.8  |
|                       |           |       |   | LHUE19c_5  | M1 | 3.33  | 0.7 | 40.9 | 14.6 | 3.3 | -19.2 | 8.3  |
|                       |           |       |   | LHUE19c_6  | M1 | 4.00  | 0.8 | 41.1 | 14.7 | 3.3 | -19.1 | 8.8  |
|                       |           |       |   | LHUE19c_7  | M1 | 4.67  | 0.5 | 40.1 | 14.1 | 3.3 | -19.3 | 8.1  |

|                            |             |       |    |            |    |       |     |      |      |     |       |      |
|----------------------------|-------------|-------|----|------------|----|-------|-----|------|------|-----|-------|------|
|                            |             |       |    | LHUE19c_8  | M1 | 5.33  | 1.1 | 42.8 | 15.5 | 3.2 | -19.2 | 9.2  |
|                            |             |       |    | LHUE19c_9  | M1 | 6.00  | 1.1 | 39.5 | 14.3 | 3.2 | -19.0 | 9.2  |
|                            |             |       |    | LHUE19c_10 | M1 | 6.67  | 1.0 | 41.4 | 15.0 | 3.2 | -19.0 | 9.6  |
|                            |             |       |    | LHUE19c_11 | M1 | 7.75  | 0.7 | 41.9 | 14.9 | 3.3 | -19.5 | 9.4  |
|                            |             |       |    | LHUE19c_12 | M1 | 9.25  | 0.5 | 40.5 | 14.3 | 3.3 | -19.4 | 9.8  |
|                            |             |       |    | LHUE19c_13 | M2 | 5.25  | 0.8 | 44.2 | 16.0 | 3.2 | -19.3 | 8.9  |
|                            |             |       |    | LHUE19c_14 | M2 | 7.08  | 0.5 | 40.2 | 14.4 | 3.2 | -19.3 | 8.9  |
|                            |             |       |    | LHUE19c_15 | M2 | 8.33  | 0.7 | 42.5 | 15.1 | 3.3 | -19.3 | 9.2  |
|                            |             |       |    | LHUE19c_16 | M2 | 9.00  | 0.6 | 43.7 | 15.9 | 3.2 | -19.3 | 9.8  |
|                            |             |       |    | LHUE19c_17 | M2 | 9.67  | 0.6 | 45.4 | 16.6 | 3.2 | -19.3 | 10.0 |
|                            |             |       |    | LHUE19c_18 | M2 | 11.00 | 0.7 | 42.6 | 15.0 | 3.3 | -19.1 | 9.0  |
|                            |             |       |    | LHUE19c_19 | M2 | 13.00 | 0.4 | 43.1 | 15.1 | 3.3 | -19.5 | 9.6  |
|                            |             |       |    | LHUE19c_20 | M2 | 15.00 | 0.7 | 43.3 | 15.1 | 3.3 | -19.4 | 9.9  |
| 5. Chabola de la Hechicera | CH.19.11.13 | 20-24 | F? | CH94_1     | M1 | 0.30  | 0.9 | 43.2 | 15.5 | 3.2 | -19.9 | 11.1 |
|                            |             |       |    | CH94_2     | M1 | 0.90  | 1.0 | 44.0 | 15.8 | 3.3 | -20.0 | 11.2 |
|                            |             |       |    | CH94_3     | M1 | 1.50  | 1.2 | 46.6 | 16.9 | 3.2 | -19.8 | 10.0 |
|                            |             |       |    | CH94_4     | M1 | 2.10  | 1.2 | 42.8 | 15.5 | 3.2 | -20.1 | 9.4  |
|                            |             |       |    | CH94_5     | M1 | 2.70  | 1.1 | 45.4 | 16.4 | 3.2 | -20.1 | 9.1  |
|                            |             |       |    | CH94_6     | M1 | 3.25  | 1.1 | 43.6 | 15.5 | 3.3 | -20.1 | 8.8  |
|                            |             |       |    | CH94_7     | M1 | 3.75  | 0.9 | 46.9 | 16.6 | 3.3 | -20.1 | 8.9  |
|                            |             |       |    | CH94_8     | M1 | 4.25  | 0.9 | 43.4 | 15.1 | 3.4 | -20.3 | 8.6  |
|                            |             |       |    | CH94_9     | M1 | 4.75  | 0.9 | 45.9 | 16.0 | 3.4 | -20.5 | 8.9  |
|                            |             |       |    | CH94_10    | M1 | 5.33  | 1.1 | 44.2 | 15.3 | 3.4 | -20.3 | 8.9  |
|                            |             |       |    | CH94_11    | M1 | 6.00  | 1.1 | 46.2 | 15.9 | 3.4 | -20.3 | 9.0  |
|                            |             |       |    | CH94_12    | M1 | 6.67  | 1.0 | 45.4 | 15.1 | 3.5 | -20.3 | 8.8  |



|                            |          |       |   |         |    |       |     |      |      |     |       |      |
|----------------------------|----------|-------|---|---------|----|-------|-----|------|------|-----|-------|------|
|                            |          |       |   | CH94_13 | M1 | 7.50  | 0.8 | 47.0 | 15.2 | 3.6 | -20.5 | 9.1  |
|                            |          |       |   | CH94_14 | M1 | 9.00  | 0.7 | 44.6 | 13.4 | 3.9 | -21.1 | 8.3  |
|                            |          |       |   | CH94_15 | M2 | 3.05  | 1.2 | 44.2 | 16.1 | 3.2 | -20.1 | 9.3  |
|                            |          |       |   | CH94_16 | M2 | 4.15  | 1.0 | 43.8 | 15.8 | 3.2 | -20.2 | 9.2  |
|                            |          |       |   | CH94_17 | M2 | 5.25  | 1.0 | 43.2 | 15.7 | 3.2 | -20.4 | 8.9  |
|                            |          |       |   | CH94_18 | M2 | 6.35  | 1.0 | 43.0 | 15.4 | 3.3 | -20.4 | 9.0  |
|                            |          |       |   | CH94_19 | M2 | 7.45  | 0.6 | 47.8 | 17.1 | 3.3 | -19.9 | 9.5  |
|                            |          |       |   | CH94_20 | M2 | 8.33  | 1.1 | 46.1 | 16.2 | 3.3 | -19.9 | 8.9  |
|                            |          |       |   | CH94_21 | M2 | 9.00  | 1.1 | 47.1 | 16.1 | 3.4 | -20.1 | 8.8  |
|                            |          |       |   | CH94_22 | M2 | 9.67  | 0.6 | 48.6 | 14.4 | 3.9 | -20.6 | 9.2  |
|                            |          |       |   | CH94_23 | M2 | 10.50 | 0.6 | 43.3 | 13.7 | 3.7 | -20.3 | 9.2  |
|                            |          |       |   | CH94_24 | M2 | 11.50 | 0.9 | 46.5 | 15.4 | 3.5 | -20.0 | 9.2  |
|                            |          |       |   | CH94_25 | M2 | 13.00 | 0.6 | 48.2 | 14.8 | 3.8 | -20.5 | 9.3  |
|                            |          |       |   | CH94_26 | M2 | 15.00 | 0.7 | 46.3 | 15.1 | 3.6 | -20.6 | 9.3  |
| 5. Chabola de la Hechicera | CH.19.13 | 24-30 | M | CH96_1  | M1 | 0.30  | 0.8 | 36.7 | 13.0 | 3.3 | -20.1 | 11.2 |
|                            |          |       |   | CH96_2  | M1 | 0.90  | 1.1 | 45.1 | 16.3 | 3.2 | -20.0 | 11.7 |
|                            |          |       |   | CH96_3  | M1 | 1.50  | 0.9 | 44.0 | 16.0 | 3.2 | -20.3 | 9.7  |
|                            |          |       |   | CH96_4  | M1 | 2.10  | 1.0 | 43.1 | 15.5 | 3.2 | -20.4 | 9.5  |
|                            |          |       |   | CH96_5  | M1 | 2.70  | 1.0 | 49.4 | 17.7 | 3.3 | -20.1 | 9.6  |
|                            |          |       |   | CH96_6  | M1 | 3.50  | 0.9 | 42.2 | 15.1 | 3.3 | -20.2 | 10.0 |
|                            |          |       |   | CH96_7  | M1 | 4.50  | 1.0 | 43.4 | 15.5 | 3.3 | -19.9 | 10.0 |
|                            |          |       |   | CH96_8  | M1 | 5.33  | 0.8 | 42.0 | 14.9 | 3.3 | -20.0 | 9.4  |
|                            |          |       |   | CH96_9  | M1 | 6.00  | 0.9 | 45.8 | 16.4 | 3.3 | -20.1 | 9.8  |
|                            |          |       |   | CH96_10 | M1 | 6.67  | 1.2 | 43.7 | 15.7 | 3.2 | -19.9 | 10.6 |
|                            |          |       |   | CH96_11 | M1 | 7.50  | 0.6 | 45.0 | 16.3 | 3.2 | -19.8 | 10.2 |

|           |             |       |    |         |    |       |     |      |      |     |       |      |
|-----------|-------------|-------|----|---------|----|-------|-----|------|------|-----|-------|------|
|           |             |       |    | CH96_12 | M1 | 8.50  | 1.0 | 45.2 | 16.1 | 3.3 | -20.0 | 9.7  |
|           |             |       |    | CH96_13 | M1 | 9.50  | 0.6 | 44.9 | 15.9 | 3.3 | -19.8 | 10.7 |
|           |             |       |    | CH96_14 | M2 | 3.05  | 1.0 | 44.7 | 16.2 | 3.2 | -20.4 | 9.6  |
|           |             |       |    | CH96_15 | M2 | 4.15  | 0.7 | 42.4 | 15.5 | 3.2 | -19.9 | 9.3  |
|           |             |       |    | CH96_16 | M2 | 5.25  | 0.4 | 44.2 | 15.8 | 3.3 | -20.0 | 8.9  |
|           |             |       |    | CH96_17 | M2 | 6.35  | 0.8 | 44.0 | 15.8 | 3.2 | -20.2 | 10.0 |
|           |             |       |    | CH96_18 | M2 | 7.45  | 0.4 | 41.2 | 14.4 | 3.3 | -20.1 | 9.7  |
|           |             |       |    | CH96_19 | M2 | 8.33  | 1.2 | 44.0 | 15.9 | 3.2 | -19.8 | 9.9  |
|           |             |       |    | CH96_20 | M2 | 9.00  | 1.1 | 47.7 | 17.3 | 3.2 | -19.7 | 9.8  |
|           |             |       |    | CH96_21 | M2 | 9.67  | 1.1 | 42.9 | 15.4 | 3.2 | -19.9 | 9.8  |
|           |             |       |    | CH96_22 | M2 | 10.25 | 0.5 | 44.5 | 15.9 | 3.3 | -19.9 | 10.1 |
|           |             |       |    | CH96_23 | M2 | 10.75 | 1.0 | 44.4 | 15.9 | 3.3 | -20.1 | 9.7  |
|           |             |       |    | CH96_24 | M2 | 11.25 | 0.8 | 43.7 | 15.7 | 3.2 | -19.8 | 10.0 |
|           |             |       |    | CH96_25 | M2 | 11.75 | 1.2 | 43.3 | 15.7 | 3.2 | -19.3 | 10.0 |
|           |             |       |    | CH96_26 | M2 | 12.67 | 0.6 | 41.3 | 14.6 | 3.3 | -19.4 | 10.9 |
|           |             |       |    | CH96_27 | M2 | 14.00 | 0.9 | 44.2 | 15.8 | 3.3 | -19.7 | 10.8 |
|           |             |       |    | CH96_28 | M2 | 15.33 | 1.0 | 45.6 | 16.2 | 3.3 | -19.9 | 10.8 |
| 6. Longar | LONGAR.1981 | 30-35 | F? | LON30_1 | M1 | 1.13  | 1.2 | 47.5 | 17.3 | 3.2 | -18.6 | 13.6 |
|           |             |       |    | LON30_2 | M1 | 1.88  | 0.3 | 37.3 | 12.6 | 3.5 | -19.3 | 11.1 |
|           |             |       |    | LON30_3 | M1 | 2.63  | 0.0 |      |      |     |       |      |
|           |             |       |    | LON30_4 | M1 | 3.67  | 0.6 | 33.0 | 11.3 | 3.4 | -19.9 | 9.2  |
|           |             |       |    | LON30_5 | M1 | 4.67  | 0.5 | 35.8 | 11.9 | 3.5 | -19.9 | 8.4  |
|           |             |       |    | LON30_6 | M1 | 5.50  | 0.4 | 36.5 | 11.9 | 3.6 | -20.0 | 8.5  |
|           |             |       |    | LON30_7 | M1 | 6.50  | 0.3 | 37.7 | 11.7 | 3.8 | -20.3 | 8.9  |
|           |             |       |    | LON30_8 | M1 | 8.50  | 0.3 | 36.5 | 11.0 | 3.9 | -20.3 | 8.6  |

|           |            |       |   |                 |           |              |            |             |             |            |              |            |
|-----------|------------|-------|---|-----------------|-----------|--------------|------------|-------------|-------------|------------|--------------|------------|
|           |            |       |   | LON30_9         | M2        | 3.05         | 0.4        | 43.6        | 15.8        | 3.2        | -19.9        | 8.6        |
|           |            |       |   | LON30_10        | M2        | 4.15         | 0.9        | 45.8        | 16.6        | 3.2        | -19.8        | 9.2        |
|           |            |       |   | LON30_11        | M2        | 5.25         | 0.5        | 44.0        | 15.6        | 3.3        | -19.7        | 9.4        |
|           |            |       |   | LON30_12        | M2        | 6.90         | 0.7        | 49.7        | 17.9        | 3.2        | -19.5        | 9.2        |
|           |            |       |   | <i>LON30_13</i> | <i>M2</i> | <i>8.33</i>  | <i>0.5</i> | <i>30.3</i> | <i>10.6</i> | <i>3.4</i> | <i>-20.2</i> | <i>8.0</i> |
|           |            |       |   | LON30_14        | M2        | 9.33         | 0.7        | 52.3        | 18.4        | 3.3        | -19.8        | 9.7        |
|           |            |       |   | LON30_15        | M2        | 10.67        | 0.6        | 46.8        | 16.6        | 3.3        | -19.6        | 9.8        |
|           |            |       |   | LON30_16        | M2        | 11.67        | 0.4        | 57.5        | 20.0        | 3.4        | -19.7        | 9.8        |
|           |            |       |   | <i>LON30_17</i> | <i>M2</i> | <i>12.67</i> | <i>0.3</i> | <i>41.4</i> | <i>13.7</i> | <i>3.5</i> | <i>-19.9</i> | <i>8.6</i> |
|           |            |       |   | <i>LON30_18</i> | <i>M2</i> | <i>14.67</i> | <i>0.4</i> | <i>42.0</i> | <i>13.8</i> | <i>3.5</i> | <i>-19.9</i> | <i>9.3</i> |
| 6. Longar | LONGAR.209 | 24-30 | M | LON34_1         | M1        | 0.90         | 0.6        | 50.5        | 18.5        | 3.2        | -18.6        | 13.5       |
|           |            |       |   | LON34_2         | M1        | 1.50         | 1.0        | 44.4        | 16.0        | 3.2        | -18.9        | 12.9       |
|           |            |       |   | LON34_3         | M1        | 2.10         | 0.8        | 42.4        | 15.2        | 3.2        | -19.2        | 11.4       |
|           |            |       |   | LON34_4         | M1        | 2.70         | 0.8        | 42.6        | 15.4        | 3.2        | -19.5        | 10.2       |
|           |            |       |   | LON34_5         | M1        | 3.20         | 1.1        | 42.4        | 15.4        | 3.2        | -19.4        | 9.7        |
|           |            |       |   | LON34_6         | M1        | 3.60         | 1.2        | 47.2        | 17.1        | 3.2        | -19.2        | 9.6        |
|           |            |       |   | LON34_7         | M1        | 4.00         | 1.1        | 47.0        | 17.1        | 3.2        | -19.4        | 9.1        |
|           |            |       |   | LON34_8         | M1        | 4.40         | 1.2        | 48.1        | 17.5        | 3.2        | -19.1        | 9.0        |
|           |            |       |   | LON34_9         | M1        | 4.80         | 1.2        | 46.3        | 16.9        | 3.2        | -19.1        | 9.2        |
|           |            |       |   | LON34_10        | M1        | 5.50         | 0.8        | 43.9        | 15.8        | 3.2        | -19.4        | 9.6        |
|           |            |       |   | LON34_11        | M1        | 6.50         | 0.7        | 42.0        | 14.8        | 3.3        | -19.6        | 9.2        |
|           |            |       |   | LON34_12        | M1        | 7.75         | 0.8        | 41.9        | 15.0        | 3.2        | -19.2        | 9.5        |
|           |            |       |   | LON34_13        | M1        | 9.25         | 0.5        | 40.7        | 14.7        | 3.2        | -19.2        | 9.4        |
|           |            |       |   | LON34_14        | M2        | 3.19         | 1.2        | 43.8        | 16.1        | 3.2        | -19.4        | 9.9        |
|           |            |       |   | LON34_15        | M2        | 4.56         | 0.9        | 46.1        | 16.8        | 3.2        | -19.5        | 9.5        |

|           |             |       |    |          |    |       |     |      |      |     |       |      |
|-----------|-------------|-------|----|----------|----|-------|-----|------|------|-----|-------|------|
|           |             |       |    | LON34_16 | M2 | 5.94  | 0.6 | 43.7 | 15.8 | 3.2 | -19.3 | 10.3 |
|           |             |       |    | LON34_17 | M2 | 7.31  | 0.6 | 45.0 | 16.3 | 3.2 | -19.5 | 10.0 |
|           |             |       |    | LON34_18 | M2 | 8.25  | 1.0 | 42.4 | 15.2 | 3.3 | -19.5 | 9.4  |
|           |             |       |    | LON34_19 | M2 | 8.75  | 0.7 | 43.6 | 15.6 | 3.3 | -19.5 | 9.1  |
|           |             |       |    | LON34_20 | M2 | 9.25  | 0.6 | 43.9 | 15.5 | 3.3 | -19.2 | 10.3 |
|           |             |       |    | LON34_21 | M2 | 9.75  | 0.7 | 43.8 | 15.7 | 3.3 | -19.5 | 9.3  |
|           |             |       |    | LON34_22 | M2 | 10.33 | 0.6 | 46.6 | 16.7 | 3.3 | -19.4 | 9.9  |
|           |             |       |    | LON34_23 | M2 | 11.00 | 0.5 | 40.4 | 14.1 | 3.3 | -19.2 | 9.3  |
|           |             |       |    | LON34_24 | M2 | 11.67 | 0.5 | 46.0 | 16.3 | 3.3 | -19.2 | 9.3  |
|           |             |       |    | LON34_25 | M2 | 13.00 | 0.4 | 41.0 | 14.2 | 3.4 | -19.4 | 9.4  |
|           |             |       |    | LON34_26 | M2 | 15.00 | 0.7 | 41.5 | 14.9 | 3.2 | -19.2 | 9.9  |
| 6. Longar | LONGAR.1967 | 30-35 | M? | LON38_1  | M1 | 0.90  | 0.7 | 41.3 | 14.6 | 3.3 | -19.2 | 12.1 |
|           |             |       |    | LON38_2  | M1 | 1.50  | 0.3 | 41.0 | 14.0 | 3.4 | -19.5 | 12.3 |
|           |             |       |    | LON38_3  | M1 | 2.10  | 0.7 | 31.3 | 10.5 | 3.5 | -19.3 | 10.9 |
|           |             |       |    | LON38_4  | M1 | 2.70  | 0.5 | 39.5 | 13.9 | 3.3 | -19.1 | 11.0 |
|           |             |       |    | LON38_5  | M1 | 3.30  | 0.3 | 42.2 | 14.2 | 3.5 | -19.5 | 10.0 |
|           |             |       |    | LON38_6  | M1 | 4.00  | 0.5 | 38.8 | 13.5 | 3.4 | -19.3 | 10.0 |
|           |             |       |    | LON38_7  | M1 | 4.67  | 0.3 | 42.7 | 14.6 | 3.4 | -19.4 | 10.0 |
|           |             |       |    | LON38_8  | M1 | 5.33  | 0.8 | 37.7 | 13.1 | 3.3 | -19.5 | 10.3 |
|           |             |       |    | LON38_9  | M1 | 6.00  | 0.5 | 34.7 | 12.2 | 3.3 | -19.7 | 11.4 |
|           |             |       |    | LON38_10 | M1 | 6.67  | 0.8 | 37.8 | 13.4 | 3.3 | -19.7 | 10.4 |
|           |             |       |    | LON38_11 | M1 | 7.75  | 0.6 | 40.6 | 14.5 | 3.3 | -19.2 | 10.9 |
|           |             |       |    | LON38_12 | M1 | 9.25  | 0.4 | 35.4 | 11.9 | 3.5 | -19.3 | 10.5 |
|           |             |       |    | LON38_13 | M2 | 2.96  | 0.8 | 42.4 | 15.4 | 3.2 | -19.3 | 10.5 |
|           |             |       |    | LON38_14 | M2 | 3.88  | 1.1 | 42.4 | 15.5 | 3.2 | -19.3 | 10.3 |

|           |            |       |    |          |    |       |     |      |      |     |       |      |
|-----------|------------|-------|----|----------|----|-------|-----|------|------|-----|-------|------|
|           |            |       |    | LON38_15 | M2 | 4.79  | 1.1 | 47.6 | 17.4 | 3.2 | -19.0 | 10.9 |
|           |            |       |    | LON38_16 | M2 | 5.71  | 1.0 | 45.7 | 16.7 | 3.2 | -19.2 | 10.9 |
|           |            |       |    | LON38_17 | M2 | 6.63  | 1.2 | 43.3 | 15.9 | 3.2 | -19.5 | 10.8 |
|           |            |       |    | LON38_18 | M2 | 7.54  | 1.2 | 48.2 | 17.6 | 3.2 | -19.5 | 11.1 |
|           |            |       |    | LON38_19 | M2 | 8.25  | 1.2 | 44.1 | 16.1 | 3.2 | -19.4 | 10.6 |
|           |            |       |    | LON38_20 | M2 | 8.75  | 1.0 | 46.1 | 16.7 | 3.2 | -19.1 | 9.7  |
|           |            |       |    | LON38_21 | M2 | 9.25  | 1.2 | 47.2 | 17.2 | 3.2 | -18.6 | 9.7  |
|           |            |       |    | LON38_22 | M2 | 9.75  | 1.2 | 46.1 | 16.9 | 3.2 | -18.4 | 9.9  |
|           |            |       |    | LON38_23 | M2 | 10.33 | 0.8 | 44.3 | 15.9 | 3.2 | -18.7 | 9.9  |
|           |            |       |    | LON38_24 | M2 | 11.00 | 0.7 | 43.4 | 15.6 | 3.2 | -19.5 | 10.1 |
|           |            |       |    | LON38_25 | M2 | 11.67 | 0.8 | 43.9 | 15.8 | 3.2 | -19.4 | 10.4 |
|           |            |       |    | LON38_26 | M2 | 12.67 | 0.7 | 42.3 | 15.2 | 3.2 | -19.1 | 10.2 |
|           |            |       |    | LON38_27 | M2 | 14.00 | 0.8 | 42.9 | 15.3 | 3.3 | -19.3 | 10.6 |
|           |            |       |    | LON38_28 | M2 | 15.33 | 0.5 | 44.0 | 15.4 | 3.3 | -19.3 | 11.0 |
| 6. Longar | LONGAR.919 | 35-40 | F? | LON41_1  | M1 | 0.90  | 0.7 | 41.7 | 15.0 | 3.2 | -19.0 | 12.0 |
|           |            |       |    | LON41_2  | M1 | 1.50  | 1.0 | 40.5 | 14.7 | 3.2 | -19.5 | 10.6 |
|           |            |       |    | LON41_3  | M1 | 2.10  | 0.9 | 41.0 | 14.8 | 3.2 | -19.6 | 9.6  |
|           |            |       |    | LON41_4  | M1 | 2.70  | 1.1 | 41.0 | 14.9 | 3.2 | -20.0 | 9.6  |
|           |            |       |    | LON41_5  | M1 | 3.20  | 0.7 | 40.9 | 14.7 | 3.3 | -20.2 | 9.3  |
|           |            |       |    | LON41_6  | M1 | 3.60  | 0.5 | 40.9 | 14.6 | 3.3 | -20.1 | 9.2  |
|           |            |       |    | LON41_7  | M1 | 4.00  | 0.6 | 40.6 | 14.7 | 3.2 | -20.0 | 9.6  |
|           |            |       |    | LON41_8  | M1 | 4.40  | 0.7 | 41.7 | 14.9 | 3.3 | -20.0 | 9.4  |
|           |            |       |    | LON41_9  | M1 | 4.80  | 0.5 | 40.2 | 14.3 | 3.3 | -19.9 | 10.5 |
|           |            |       |    | LON41_10 | M1 | 5.33  | 0.7 | 42.0 | 15.0 | 3.3 | -19.8 | 8.6  |
|           |            |       |    | LON41_11 | M1 | 6.00  | 0.5 | 40.3 | 14.4 | 3.3 | -19.7 | 8.5  |

|  |  |  |  |                 |           |             |            |             |             |            |              |            |
|--|--|--|--|-----------------|-----------|-------------|------------|-------------|-------------|------------|--------------|------------|
|  |  |  |  | LON41_12        | M1        | 6.67        | 0.6        | 40.7        | 14.7        | 3.2        | -19.3        | 9.2        |
|  |  |  |  | LON41_13        | M1        | 7.75        | 0.5        | 40.3        | 14.3        | 3.3        | -19.3        | 9.4        |
|  |  |  |  | <i>LON41_14</i> | <i>M1</i> | <i>9.25</i> | <i>0.4</i> | <i>39.4</i> | <i>13.3</i> | <i>3.5</i> | <i>-20.5</i> | <i>8.6</i> |
|  |  |  |  | LON41_15        | M2        | 3.42        | 1.0        | 42.8        | 15.4        | 3.2        | -20.2        | 9.8        |
|  |  |  |  | LON41_16        | M2        | 5.25        | 0.7        | 43.1        | 15.4        | 3.3        | -20.1        | 9.4        |
|  |  |  |  | LON41_17        | M2        | 7.08        | 0.7        | 42.6        | 15.1        | 3.3        | -20.1        | 9.2        |
|  |  |  |  | LON41_18        | M2        | 8.33        | 0.5        | 42.7        | 15.0        | 3.3        | -19.5        | 8.9        |
|  |  |  |  | LON41_19        | M2        | 9.33        | 0.6        | 34.4        | 12.1        | 3.3        | -20.2        | 9.7        |
|  |  |  |  | LON41_20        | M2        | 10.33       | 0.6        | 43.0        | 15.3        | 3.3        | -19.8        | 9.9        |
|  |  |  |  | LON41_21        | M2        | 11.00       | 0.6        | 43.0        | 15.4        | 3.3        | -19.8        | 10.1       |
|  |  |  |  | LON41_22        | M2        | 11.67       | 0.5        | 43.4        | 15.2        | 3.3        | -19.8        | 9.7        |
|  |  |  |  | LON41_23        | M2        | 14.00       | 0.5        | 42.9        | 14.5        | 3.4        | -19.9        | 9.8        |

\* For details on age and sex estimation methods, see *10* and *18*.

† Values from samples exhibiting anomalous C:N ratios, %C, %N and/or having sample weights < 0.4mg are shown in italics and highlighted in gray.

**Table S2. Comparison between cave and megalithic grave dentine collagen carbon ( $\delta^{13}\text{C}_{\text{dcol}}$ ) and nitrogen ( $\delta^{15}\text{N}_{\text{dcol}}$ ) isotope values.**

| Age (years)     | $\delta^{13}\text{C}_{\text{dcol}}$ (‰) (VPDB) |     |             |                      |                   |     |             |                      |                           |              |
|-----------------|------------------------------------------------|-----|-------------|----------------------|-------------------|-----|-------------|----------------------|---------------------------|--------------|
|                 | Caves                                          |     |             |                      | Megalithic graves |     |             |                      | Mixed model nested ANOVA† |              |
|                 | k                                              | n   | pooled mean | $\sqrt{\text{GV}}^*$ | k                 | n   | pooled mean | $\sqrt{\text{GV}}^*$ | <i>F</i>                  | <i>p</i>     |
| 0-2.9           | 14                                             | 53  | -19.7       | 0.4                  | 13                | 47  | -19.4       | 0.5                  | $F_{(1, 24.47)} = 1.08$   | 0.309        |
| 3-4.9           | 14                                             | 77  | -19.9       | 0.3                  | 13                | 66  | -19.7       | 0.4                  | $F_{(1, 24.78)} = 3.25$   | 0.084        |
| 5-6.9           | 14                                             | 58  | -19.9       | 0.3                  | 13                | 50  | -19.6       | 0.4                  | $F_{(1, 24.76)} = 5.39$   | <b>0.029</b> |
| 7-9.9           | 14                                             | 91  | -19.8       | 0.4                  | 13                | 72  | -19.5       | 0.4                  | $F_{(1, 24.61)} = 6.50$   | <b>0.018</b> |
| 10-11.9         | 14                                             | 37  | -19.6       | 0.4                  | 12                | 32  | -19.3       | 0.4                  | $F_{(1, 23.66)} = 2.12$   | 0.159        |
| 12-16           | 14                                             | 27  | -19.7       | 0.4                  | 11                | 22  | -19.4       | 0.4                  | $F_{(1, 22.17)} = 6.18$   | <b>0.021</b> |
| COMBINED (0-16) | 14                                             | 343 | -19.8       | 0.4                  | 13                | 289 | -19.5       | 0.4                  | $F_{(1, 24.94)} = 5.22$   | <b>0.031</b> |
| Age (years)     | $\delta^{15}\text{N}_{\text{dcol}}$ (‰) (AIR)  |     |             |                      |                   |     |             |                      |                           |              |
|                 | Caves                                          |     |             |                      | Megalithic graves |     |             |                      | Mixed model nested ANOVA† |              |
|                 | k                                              | n   | pooled mean | $\sqrt{\text{GV}}^*$ | k                 | n   | pooled mean | $\sqrt{\text{GV}}^*$ | <i>F</i>                  | <i>p</i>     |
| 0-2.9           | 14                                             | 53  | 10.7        | 1.2                  | 13                | 47  | 11.2        | 1.5                  | $F_{(1, 23.66)} = 0.32$   | 0.580        |
| 3-4.9           | 14                                             | 77  | 9.4         | 0.6                  | 13                | 66  | 9.3         | 0.6                  | $F_{(1, 24.69)} < 0.01$   | 0.978        |
| 5-6.9           | 14                                             | 58  | 9.4         | 0.5                  | 13                | 50  | 9.4         | 0.7                  | $F_{(1, 24.69)} = 0.12$   | 0.760        |
| 7-9.9           | 14                                             | 91  | 9.5         | 0.6                  | 13                | 72  | 9.5         | 0.6                  | $F_{(1, 24.46)} = 0.82$   | 0.478        |
| 10-11.9         | 14                                             | 37  | 9.4         | 0.7                  | 12                | 32  | 9.6         | 0.5                  | $F_{(1, 23.40)} = 0.86$   | 0.330        |
| 12-16           | 14                                             | 27  | 9.7         | 0.5                  | 11                | 22  | 9.9         | 0.6                  | $F_{(1, 22.51)} = 0.80$   | 0.279        |
| COMBINED (0-16) | 14                                             | 343 | 9.6         | 0.9                  | 13                | 289 | 9.7         | 1.0                  | $F_{(1, 24.70)} = 3.03$   | 0.397        |

\* Composite or pooled standard deviations.

† Satterthwaite's correction formula is used to take into account unequal group sample sizes (58, 59).

**Table S3. Comparison between cave and megalithic male and female dentine collagen carbon isotope values ( $\delta^{13}\text{C}_{\text{deol}}$ ).**

| Age (years)     | Cave males   |     |             |                      | Megalithic males   |     |             |                      | Mixed model nested ANOVA† |              |
|-----------------|--------------|-----|-------------|----------------------|--------------------|-----|-------------|----------------------|---------------------------|--------------|
|                 | k            | n   | pooled mean | $\sqrt{\text{GV}}^*$ | k                  | n   | pooled mean | $\sqrt{\text{GV}}^*$ | <i>F</i>                  | <i>p</i>     |
| 0-2.9           | 7            | 29  | -19.5       | 0.4                  | 7                  | 27  | -19.4       | 0.5                  | $F_{(1, 11.89)} = 0.10$   | 0.763        |
| 3-4.9           | 7            | 39  | -19.9       | 0.2                  | 7                  | 31  | -19.6       | 0.3                  | $F_{(1, 11.88)} = 5.18$   | <b>0.044</b> |
| 5-6.9           | 7            | 31  | -19.8       | 0.2                  | 7                  | 28  | -19.5       | 0.3                  | $F_{(1, 11.81)} = 4.67$   | 0.054        |
| 7-9.9           | 7            | 49  | -19.7       | 0.3                  | 7                  | 47  | -19.5       | 0.3                  | $F_{(1, 11.91)} = 2.75$   | 0.126        |
| 10-11.9         | 7            | 21  | -19.5       | 0.3                  | 7                  | 19  | -19.3       | 0.4                  | $F_{(1, 11.67)} = 0.93$   | 0.355        |
| 12-16           | 7            | 15  | -19.6       | 0.3                  | 7                  | 16  | -19.3       | 0.4                  | $F_{(1, 11.79)} = 2.47$   | 0.145        |
| COMBINED (0-16) | 7            | 184 | -19.7       | 0.3                  | 7                  | 168 | -19.4       | 0.4                  | $F_{(1, 11.98)} = 3.29$   | 0.097        |
|                 |              |     |             |                      |                    |     |             |                      |                           |              |
| Age (years)     | Cave females |     |             |                      | Megalithic females |     |             |                      | Mixed model nested ANOVA† |              |
|                 | k            | n   | pooled mean | $\sqrt{\text{GV}}^*$ | k                  | n   | pooled mean | $\sqrt{\text{GV}}^*$ | <i>F</i>                  | <i>p</i>     |
| 0-2.9           | 7            | 24  | -19.8       | 0.4                  | 6                  | 20  | -19.4       | 0.5                  | $F_{(1, 10.74)} = 1.23$   | 0.293        |
| 3-4.9           | 7            | 38  | -19.9       | 0.3                  | 6                  | 35  | -19.8       | 0.4                  | $F_{(1, 10.92)} = 0.26$   | 0.620        |
| 5-6.9           | 7            | 27  | -19.9       | 0.4                  | 6                  | 22  | -19.6       | 0.4                  | $F_{(1, 10.94)} = 1.49$   | 0.250        |
| 7-9.9           | 7            | 42  | -19.9       | 0.4                  | 6                  | 25  | -19.6       | 0.4                  | $F_{(1, 10.78)} = 3.17$   | 0.105        |
| 10-11.9         | 7            | 16  | -19.7       | 0.5                  | 5                  | 13  | -19.4       | 0.4                  | $F_{(1, 9.96)} = 1.10$    | 0.321        |
| 12-16           | 7            | 12  | -19.9       | 0.4                  | 4                  | 6   | -19.5       | 0.3                  | $F_{(1, 8.30)} = 3.05$    | 0.119        |
| COMBINED (0-16) | 7            | 159 | -19.8       | 0.4                  | 6                  | 121 | -19.6       | 0.4                  | $F_{(1, 10.97)} = 1.88$   | 0.201        |

\* Composite or pooled standard deviations.

† Satterthwaite's correction formula is used to take into account unequal group sample sizes (58, 59).



**Table S4. Estimated duration of exclusive breastfeeding and weaning process, age at complete weaning, and preweaning and postweaning dentine collagen nitrogen isotope values ( $\delta^{15}\text{N}_{\text{dcol}}$ ) for the 27 individuals selected for the early life history approach.**

| Burial location                | Site                              | ID              | Individual      | Age*       | Sex*       | Estimated duration of exclusive breastfeeding (years) | Estimated $\delta^{15}\text{N}$ pre-weaning | Estimated duration of weaning period (years) | Estimated age at complete weaning (years) | Estimated $\delta^{15}\text{N}_{\text{dcol}}$ post-weaning |
|--------------------------------|-----------------------------------|-----------------|-----------------|------------|------------|-------------------------------------------------------|---------------------------------------------|----------------------------------------------|-------------------------------------------|------------------------------------------------------------|
| Funerary cave                  | Las Yurdinas II                   | LYII26          | LYII.A.10.15065 | YA (30-35) | M          | < 0.9                                                 | indet.                                      | > 3.8                                        | 4.7                                       | 8.8                                                        |
|                                |                                   | LYII27          | LYII.A.10.15080 | YA (30-40) | M          | $\leq$ 0.9                                            | indet.                                      | $\geq$ 2.9                                   | 3.8                                       | 9.2                                                        |
|                                |                                   | LYII29          | LYII.A.10.15077 | YA (24-30) | M          | 0.9                                                   | 11.3                                        | 2.3                                          | 3.2                                       | 8.5                                                        |
|                                |                                   | LYII30          | LYII.A.10.15064 | YA (35-40) | M          | < 0.9                                                 | indet.                                      | > 2.9                                        | 3.8                                       | 9.3                                                        |
|                                |                                   | LYII34          | LYII.A.10.15120 | YA (20-24) | M          | $\leq$ 0.4                                            | indet.                                      | $\geq$ 2.2                                   | 2.6                                       | 9.1                                                        |
|                                |                                   | LYII40          | LYII.A.10.15098 | YA (24-30) | M?         | 0.9                                                   | 11.9                                        | 2.3                                          | 3.2                                       | 8.3                                                        |
|                                |                                   | LYII41          | LYII.A.10.15067 | YA (20-24) | F          | $\leq$ 0.9                                            | indet.                                      | $\geq$ 3.1                                   | 4.0                                       | 9.1                                                        |
|                                |                                   | LYII42          | LYII.A.10.15071 | YA (30-35) | F          | < 1.5                                                 | indet.                                      | > 2.3                                        | 3.8                                       | 8.3                                                        |
|                                | LYII43                            | LYII.A.10.15089 | YA (24-35)      | F          | $\leq$ 0.6 | indet.                                                | $\geq$ 3.0                                  | 3.6                                          | 8.1                                       |                                                            |
|                                | LYII56                            | LYII.A.10.15085 | YA (24-30)      | F          | < 1.5      | indet.                                                | > 1.0                                       | 2.5                                          | 9.6                                       |                                                            |
|                                | Los Husos I                       | LHI57           | LHI.F1.378      | MA (40-45) | F?         | < 1.5                                                 | indet.                                      | > 1.2                                        | 2.7                                       | 8.5                                                        |
|                                |                                   | LHI58           | LHI.D1.342.5    | YA (24-30) | M          | < 0.9                                                 | indet.                                      | > 1.8                                        | 2.7                                       | 10.0                                                       |
|                                |                                   | LHI62           | LHI.A4.282      | J (ca. 15) | F          | $\leq$ 0.5                                            | indet.                                      | $\geq$ 3.1                                   | 3.6                                       | 9.6                                                        |
|                                | Peña Larga                        | CPL5            | CPL.50365-50366 | YA (20-30) | F?         | < 0.9                                                 | indet.                                      | > 1.2                                        | 2.1                                       | 9.7                                                        |
| <i>Funerary caves combined</i> |                                   |                 |                 |            | $\bar{X}$  | $\leq$ 0.9                                            | 11.6                                        | $\geq$ 2.4                                   | 3.3                                       | 9.0                                                        |
|                                |                                   |                 |                 |            | $\sigma$   | 0.3                                                   | 0.4                                         | 0.8                                          | 0.7                                       | 0.6                                                        |
| Megalithic grave               | Alto de la Huesera                | LHUE34          | AH.2111         | YA (35-40) | F          | 1.5                                                   | 12.4                                        | 3.3                                          | 4.8                                       | 7.9                                                        |
|                                |                                   | LHUE36          | AH.2157         | YA (30-35) | F          | < 1.5                                                 | indet.                                      | > 2.0                                        | 3.5                                       | 10.2                                                       |
|                                |                                   | LHUE52          | AH.2170         | YA (24-30) | F?         | 1.1                                                   | 12.0                                        | 2.5                                          | 3.6                                       | 9.1                                                        |
|                                |                                   | LHUE53          | AH.2169         | MA (45-55) | M          | 1.1                                                   | 12.9                                        | 2.7                                          | 3.8                                       | 8.9                                                        |
|                                |                                   | LHUE2i          | AH.2075         | YA (24-30) | M          | < 1.1                                                 | indet.                                      | > 2.2                                        | 3.3                                       | 8.4                                                        |
|                                |                                   | LHUE17c         | AH.2383.2       | MA (40-45) | M          | $\leq$ 0.8                                            | indet.                                      | $\geq$ 2.8                                   | 3.6                                       | 8.4                                                        |
|                                | Chabola de la Hechicera           | LHUE19c         | AH.2386.2       | MA (40-55) | M          | $\leq$ 0.9                                            | indet.                                      | $\geq$ 3.8                                   | 4.7                                       | 8.2                                                        |
|                                |                                   | CH94            | CH.19.11.13     | YA (20-24) | F?         | 0.9                                                   | 11.2                                        | 3.4                                          | 4.3                                       | 8.6                                                        |
|                                | Longar                            | CH96            | CH.19.13        | YA (24-30) | M          | 0.9                                                   | 11.7                                        | 1.2                                          | 2.1†                                      | 9.5                                                        |
|                                |                                   | LON30           | LONGAR.1981     | YA (30-35) | F?         | $\leq$ 1.1                                            | indet.                                      | $\geq$ 2.0                                   | 3.1                                       | 8.6                                                        |
|                                |                                   | LON34           | LONGAR.209      | YA (24-30) | M          | $\leq$ 0.9                                            | indet.                                      | $\geq$ 3.5                                   | 4.4                                       | 9.0                                                        |
|                                |                                   | LON38           | LONGAR.1967     | YA (30-35) | M?         | < 0.9                                                 | indet.                                      | > 3.1                                        | 4.0                                       | 10.0                                                       |
|                                | LON41                             | LONGAR.919      | YA (35-40)      | F?         | < 0.9      | indet.                                                | > 2.7                                       | 3.6                                          | 9.2                                       |                                                            |
|                                | <i>Megalithic graves combined</i> |                 |                 |            |            | $\bar{X}$                                             | $\leq$ 1.0                                  | 12.0                                         | $\geq$ 2.7                                | 3.9†                                                       |
|                                |                                   |                 |                 |            | $\sigma$   | 0.2                                                   | 0.7                                         | 0.7                                          | 0.5†                                      | 0.7                                                        |

\* For details on age and sex estimation methods, see 10 and 18.

† CH96 was excluded from the calculation of the mean values of megalithic graves and from statistical tests for being a clearly outlier (Z-score > 2.0).

**Table S5. Summary table of adult bone collagen carbon ( $\delta^{13}\text{C}_{\text{bcoll}}$ ) and nitrogen ( $\delta^{15}\text{N}_{\text{bcoll}}$ ) isotope values, dentine collagen carbon ( $\delta^{13}\text{C}_{\text{dcoll}}$ ) and nitrogen ( $\delta^{15}\text{N}_{\text{dcoll}}$ ) isotope values (mean), enamel carbonate oxygen isotope values ( $\delta^{18}\text{O}_{\text{c}}$ ), and enamel apatite carbon ( $\delta^{13}\text{C}_{\text{ap}}$ ) and strontium ( $^{87}\text{Sr}/^{86}\text{Sr}$ ) isotope, and strontium ([Sr]) and calcium concentration ([Ca]) values for the 32 individuals analyzed in the study.**

| Site            | Id. number      | Individual      | Age*       | Sex*  | Bone collagen†                       |                                      | Dentine collagen‡                               |          |                                                 |          |                                                 |          |                                                 |          | Enamel                                      |                                             |                                              |                                              |                                                        |                        |                       |                       |
|-----------------|-----------------|-----------------|------------|-------|--------------------------------------|--------------------------------------|-------------------------------------------------|----------|-------------------------------------------------|----------|-------------------------------------------------|----------|-------------------------------------------------|----------|---------------------------------------------|---------------------------------------------|----------------------------------------------|----------------------------------------------|--------------------------------------------------------|------------------------|-----------------------|-----------------------|
|                 |                 |                 |            |       | $\delta^{13}\text{C}_{\text{bcoll}}$ | $\delta^{15}\text{N}_{\text{bcoll}}$ | $\text{M1 } \delta^{13}\text{C}_{\text{dcoll}}$ |          | $\text{M2 } \delta^{13}\text{C}_{\text{dcoll}}$ |          | $\text{M1 } \delta^{15}\text{N}_{\text{dcoll}}$ |          | $\text{M2 } \delta^{15}\text{N}_{\text{dcoll}}$ |          | Carbonate                                   |                                             | Apatite                                      |                                              |                                                        |                        |                       |                       |
|                 |                 |                 |            |       |                                      |                                      | $\bar{X}$                                       | $\sigma$ | $\bar{X}$                                       | $\sigma$ | $\bar{X}$                                       | $\sigma$ | $\bar{X}$                                       | $\sigma$ | $\text{M1 } \delta^{18}\text{O}_{\text{c}}$ | $\text{M2 } \delta^{18}\text{O}_{\text{c}}$ | $\text{M1 } \delta^{13}\text{C}_{\text{ap}}$ | $\text{M2 } \delta^{13}\text{C}_{\text{ap}}$ | $\text{M2 } ^{87}\text{Sr}/^{86}\text{Sr} \pm 2\sigma$ | $\text{M2 [Sr] (ppm)}$ | $\text{M2 [Ca] (\%)}$ | $\text{M2 [Sr]/[Ca]}$ |
| Las Yurdinas II | LYII25          | LYII.A.10.15086 | YA (30-40) | M     | -20.0                                | 9.7                                  | -                                               | -        | -                                               | -        | -                                               | -        | -                                               | -        | -4.1                                        | -4.5                                        | -13.7                                        | -12.9                                        | 0.708083 $\pm$ 10                                      | 201.7                  | 38.3                  | 5.27                  |
|                 | LYII26          | LYII.A.10.15065 | YA (30-35) | M     | -19.9                                | 9.6                                  | -19.9                                           | 0.3      | -20.1                                           | 0.2      | 11.0                                            | 0.8      | 9.3                                             | 0.4      | -3.7                                        | -5.7                                        | -12.4                                        | -13.5                                        | 0.710083 $\pm$ 16                                      | 98.5                   | 50.0                  | 1.97                  |
|                 | LYII27          | LYII.A.10.15080 | YA (30-40) | M     | -19.9                                | 9.5                                  | -19.4                                           | 0.1      | -19.7                                           | 0.2      | 11.5                                            | 1.5      | 9.7                                             | 0.4      | -4.0                                        | -5.2                                        | -13.5                                        | -14.4                                        | 0.708990 $\pm$ 17                                      | 51.1                   | 36.4                  | 1.40                  |
|                 | LYII29          | LYII.A.10.15077 | YA (24-30) | M     | -20.2                                | 8.5                                  | -19.4                                           | 0.2      | -19.9                                           | 0.1      | 10.6                                            | 0.8      | 9.0                                             | 0.3      | -2.8                                        | -4.4                                        | -12.1                                        | -13.7                                        | 0.708663 $\pm$ 13                                      | 67.6                   | 36.8                  | 1.84                  |
|                 | LYII30          | LYII.A.10.15064 | YA (35-40) | M     | -20.1                                | 9.7                                  | -19.9                                           | 0.2      | -20.1                                           | 0.2      | 10.2                                            | 0.6      | 9.6                                             | 0.3      | -3.0                                        | -4.3                                        | -14.1                                        | -14.1                                        | 0.708511 $\pm$ 10                                      | 142.8                  | 36.1                  | 3.96                  |
|                 | LYII34          | LYII.A.10.15120 | YA (20-24) | M     | -20.1                                | 8.8                                  | -19.1                                           | 0.5      | -19.6                                           | 0.2      | 11.5                                            | 1.8      | 9.4                                             | 0.3      | -4.0                                        | -4.5                                        | -13.8                                        | -13.1                                        | 0.708238 $\pm$ 10                                      | 140.2                  | 37.7                  | 3.72                  |
|                 | LYII40          | LYII.A.10.15098 | YA (24-30) | M?    | -20.2                                | 8.3                                  | -19.4                                           | 0.3      | -19.8                                           | 0.2      | 11.1                                            | 1.0      | 8.9                                             | 0.5      | -2.8                                        | -4.6                                        | -13.0                                        | -14.3                                        | 0.709663 $\pm$ 13                                      | 59.7                   | 37.7                  | 1.58                  |
|                 | LYII41          | LYII.A.10.15067 | YA (20-24) | F     | -20.3                                | 9.3                                  | -19.5                                           | 0.1      | -19.5                                           | 0.1      | 11.3                                            | 1.1      | 9.3                                             | 0.4      | -3.5                                        | -4.1                                        | -13.4                                        | -13.3                                        | 0.708884 $\pm$ 14                                      | 36.2                   | 35.5                  | 1.02                  |
|                 | LYII42          | LYII.A.10.15071 | YA (30-35) | F     | -20.8                                | 9.0                                  | -20.4                                           | 0.2      | -20.3                                           | 0.2      | 9.2                                             | 0.5      | 8.9                                             | 0.3      | -2.8                                        | -3.1                                        | -14.7                                        | -14.3                                        | 0.710238 $\pm$ 9                                       | 109.0                  | 34.7                  | 3.14                  |
|                 | LYII43          | LYII.A.10.15089 | YA (24-35) | F     | -20.7                                | 9.1                                  | -19.7                                           | 0.1      | -20.0                                           | 0.2      | 10.7                                            | 1.1      | 8.7                                             | 0.6      | -3.4                                        | -4.0                                        | -13.1                                        | -14.4                                        | 0.709269 $\pm$ 19                                      | 33.2                   | 35.1                  | 0.95                  |
| LYII56          | LYII.A.10.15085 | YA (24-30)      | F          | -20.1 | 9.4                                  | -20.3                                | 0.2                                             | -20.2    | 0.2                                             | 10.3     | 1.0                                             | 9.8      | 0.2                                             | -4.3     | -5.0                                        | -13.0                                       | -13.4                                        | 0.707961 $\pm$ 11                            | 277.2                                                  | 36.9                   | 7.51                  |                       |
| Los Husos I     | LHI57           | LHI.F1.378      | MA (40-45) | F?    | -20.2                                | 9.1                                  | -19.9                                           | 0.2      | -19.7                                           | 0.3      | 8.7                                             | 0.2      | 9.2                                             | 0.5      | -3.3                                        | -4.4                                        | -12.7                                        | -14.4                                        | 0.708421 $\pm$ 10                                      | 48.3                   | 38.2                  | 1.26                  |
|                 | LHI58           | LHI.D1.342.5    | YA (24-30) | M     | -20.1                                | 9.3                                  | -19.7                                           | 0.2      | -19.9                                           | 0.2      | 10.9                                            | 0.9      | 10.1                                            | 0.3      | -2.8                                        | -4.5                                        | -14.8                                        | -14.5                                        | 0.707928 $\pm$ 13                                      | 279.2                  | 39.0                  | 7.16                  |
|                 | LHI62           | LHI.A4.282      | J (ca. 15) | F     | -19.9                                | 9.4                                  | -19.2                                           | 0.3      | -19.6                                           | 0.1      | 12.5                                            | 1.2      | 10.0                                            | 0.3      | -3.7                                        | -3.6                                        | -13.6                                        | -12.2                                        | 0.707887 $\pm$ 22                                      | 248.4                  | 36.8                  | 6.75                  |
| Peña Larga      | CPL2            | CPL.4968-4971   | J (ca. 15) | I     | -20.3                                | 9.5                                  | -                                               | -        | -                                               | -        | -                                               | -        | -                                               | -4.7     | -3.3                                        | -14.4                                       | -14.4                                        | 0.708214 $\pm$ 10                            | 80.9                                                   | 35.3                   | 2.29                  |                       |

|                         |         |                 |            |    |       |      |       |     |       |     |      |     |      |     |      |      |       |       |              |       |      |       |
|-------------------------|---------|-----------------|------------|----|-------|------|-------|-----|-------|-----|------|-----|------|-----|------|------|-------|-------|--------------|-------|------|-------|
|                         | CPL5    | CPL.50365-50366 | YA (20-30) | F? | -20.5 | 10.1 | -19.8 | 0.1 | -20.2 | 0.2 | 10.5 | 0.5 | 9.7  | 0.3 | -3.7 | -4.3 | -14.5 | -15.1 | 0.708309 ±18 | 171.0 | 38.9 | 4.40  |
| Alto de la Huesera      | LHUE34  | AH.2111         | YA (35-40) | F  | -20.0 | 8.7  | -19.1 | 0.2 | -19.5 | 0.2 | 12.1 | 0.4 | 9.0  | 0.9 | -3.1 | -4.6 | -13.2 | -12.7 | 0.707995 ±10 | 232.1 | 36.4 | 6.38  |
|                         | LHUE36  | AH.2157         | YA (30-35) | F  | -20.0 | 9.8  | -19.4 | 0.1 | -19.5 | 0.3 | 13.0 | 0.9 | 10.3 | 0.7 | -3.4 | -4.2 | -13.0 | -12.8 | 0.708734 ±13 | 195.4 | 36.8 | 5.31  |
|                         | LHUE52  | AH.2170         | YA (24-30) | F? | -19.6 | 9.1  | -19.7 | 0.2 | -19.5 | 0.3 | 11.3 | 1.2 | 9.5  | 0.3 | -4.1 | -3.3 | -13.9 | -12.3 | 0.707888 ±11 | 231.8 | 35.0 | 6.62  |
|                         | LHUE53  | AH.2169         | MA (45-55) | M  | -19.5 | 9.8  | -19.2 | 0.2 | -19.8 | 0.2 | 12.5 | 0.7 | 9.4  | 0.8 | -2.3 | -3.3 | -13.3 | -13.5 | 0.707883 ±10 | 281.3 | 35.6 | 7.90  |
|                         | LHUE2i  | AH.2075         | YA (24-30) | M  | -19.3 | 8.3  | -19.6 | 0.2 | -19.6 | 0.2 | 9.4  | 0.4 | 9.1  | 0.4 | -3.4 | -4.0 | -13.9 | -13.1 | 0.707875 ±11 | 246.2 | 38.8 | 6.35  |
|                         | LHUE17c | AH.2383.2       | MA (40-45) | M  | -19.7 | 8.8  | -19.3 | 0.3 | -19.5 | 0.1 | 9.8  | 1.3 | 9.2  | 0.5 | -3.6 | -4.3 | -12.9 | -13.2 | 0.708320 ±13 | 157.4 | 37.4 | 4.21  |
|                         | LHUE19c | AH.2386.2       | MA (40-55) | M  | -19.6 | 9.5  | -19.5 | 0.4 | -19.2 | 0.2 | 10.0 | 1.6 | 8.9  | 0.5 | -4.3 | -4.1 | -14.3 | -12.1 | 0.708715 ±10 | 305.5 | 37.3 | 8.19  |
| Chabola de la Hechicera | CH94    | CH.19.11.13     | YA (20-24) | F? | -20.3 | 9.3  | -20.0 | 0.2 | -20.2 | 0.2 | 10.1 | 1.0 | 9.0  | 0.2 | -4.0 | -4.7 | -15.1 | -14.5 | 0.709733 ±10 | 54.6  | 36.4 | 1.50  |
|                         | CH96    | CH.19.13        | YA (24-30) | M  | -20.3 | 9.8  | -20.2 | 0.1 | -20.0 | 0.2 | 10.3 | 1.1 | 9.8  | 0.5 | -3.5 | -3.9 | -14.6 | -14.2 | 0.707942 ±9  | 261.6 | 37.8 | 6.92  |
| Longar                  | LON5    | LONGAR.310      | MA (40-45) | M  | -19.9 | 9.9  | -     | -   | -     | -   | -    | -   | -    | -   | -3.9 | -4.9 | -14.5 | -13.4 | 0.707862 ±12 | 346.7 | 35.3 | 9.82  |
|                         | LON30   | LONGAR.1981     | YA (30-35) | F? | -20.2 | 9.1  | -18.6 | 0.0 | -19.8 | 0.2 | 13.6 | 0.0 | 9.1  | 0.3 | -3.7 | -5.0 | -13.0 | -12.6 | 0.708010 ±10 | 379.4 | 35.4 | 10.72 |
|                         | LON31   | LONGAR.2008     | YA (20-24) | A  | -19.8 | 9.9  | -     | -   | -     | -   | -    | -   | -    | -   | -4.0 | -4.6 | -13.7 | -12.6 | 0.708013 ±10 | 356.8 | 37.6 | 9.49  |
|                         | LON34   | LONGAR.209      | YA (24-30) | M  | -19.8 | 9.5  | -19.1 | 0.4 | -19.4 | 0.2 | 12.0 | 1.5 | 9.6  | 0.4 | -4.7 | -4.9 | -14.2 | -13.8 | 0.707902 ±10 | 271.8 | 38.7 | 7.02  |
|                         | LON38   | LONGAR.1967     | YA (30-35) | M? | -19.7 | 10.2 | -19.2 | 0.1 | -19.4 | 0.2 | 11.2 | 0.8 | 10.7 | 0.4 | -3.4 | -4.3 | -12.9 | -12.8 | 0.707777 ±11 | 312.2 | 37.5 | 8.33  |
|                         | LON41   | LONGAR.919      | YA (35-40) | F? | -20.2 | 9.9  | -19.5 | 0.4 | -19.9 | 0.3 | 10.4 | 1.1 | 9.3  | 0.5 | -3.5 | -3.4 | -14.1 | -12.5 | 0.707810 ±11 | 765.4 | 36.5 | 20.97 |
|                         | LON43   | LONGAR.730      | MA (45-55) | M  | -19.8 | 10.1 | -     | -   | -     | -   | -    | -   | -    | -   | -2.0 | -3.5 | -11.6 | -12.3 | 0.707880 ±10 | 558.5 | 32.3 | 17.29 |

\* For details on age and sex estimation methods see 10 and 18.

† After 18.

‡ Mean of dentine collagen carbon isotope values ( $\delta^{13}\text{C}_{\text{dcol}}$ ) corresponding to formation ages of M1 (0-3 years) and M2 crowns (2.5-8 years) (34) (cf. Table S1).

§ Each  $^{87}\text{Sr}/^{86}\text{Sr}$  value is reported with a  $2\sigma$  error (absolute error value of the individual sample analysis – internal error, reported as times  $10^6$ ).

| Table S6. Comparison between M1 and M2 crowns' dentine collagen ( $\delta^{13}\text{C}_{\text{col}}$ ) and enamel apatite ( $\delta^{13}\text{C}_{\text{ap}}$ ) carbon isotope values, including $\Delta$ calculation, by site and burial location. |                            |                                                |              |                           |              |                                                    |    |           |          |                                      |          |     |     |
|-----------------------------------------------------------------------------------------------------------------------------------------------------------------------------------------------------------------------------------------------------|----------------------------|------------------------------------------------|--------------|---------------------------|--------------|----------------------------------------------------|----|-----------|----------|--------------------------------------|----------|-----|-----|
| Burial location                                                                                                                                                                                                                                     | Site                       | $\delta^{13}\text{C}_{\text{dcol}}$ (‰) (VPDB) |              |                           |              | $\delta^{13}\text{C}_{\text{ap}}$ means (‰) (VPDB) |    |           |          | $\Delta_{\text{dcol-ap}}$ (‰) (VPDB) |          |     |     |
|                                                                                                                                                                                                                                                     |                            | n                                              | M1           |                           | M2           |                                                    | n  | M1        |          | M2                                   |          | M1  | M2  |
|                                                                                                                                                                                                                                                     |                            |                                                | pooled mean* | $\sqrt{\text{GV}}\dagger$ | pooled mean* | $\sqrt{\text{GV}}\dagger$                          |    | $\bar{x}$ | $\sigma$ | $\bar{x}$                            | $\sigma$ |     |     |
| Funerary cave                                                                                                                                                                                                                                       | Las Yurdinas II            | 10                                             | -19.7        | 0.4                       | -19.9        | 0.3                                                | 11 | -13.3     | 0.7      | -13.8                                | 0.6      | 6.4 | 6.1 |
|                                                                                                                                                                                                                                                     | Los Husos I                | 3                                              | -19.6        | 0.3                       | -19.7        | 0.2                                                | 3  | -13.7     | 1.0      | -13.7                                | 1.3      | 5.9 | 6.0 |
|                                                                                                                                                                                                                                                     | Peña Larga                 | 1                                              | -19.8        | -                         | -20.2        | -                                                  | 2  | -14.5     | 0.1      | -14.8                                | 0.5      | 5.3 | 5.4 |
|                                                                                                                                                                                                                                                     | Funerary caves combined    | 14                                             | -19.7        | 0.4                       | -19.9        | 0.3                                                | 16 | -13.5     | 0.8      | -13.9                                | 0.8      | 6.2 | 6.0 |
| Megalithic grave                                                                                                                                                                                                                                    | Alto de la Huesera         | 7                                              | -19.4        | 0.3                       | -19.5        | 0.3                                                | 7  | -13.5     | 0.5      | -12.8                                | 0.5      | 5.9 | 6.7 |
|                                                                                                                                                                                                                                                     | Chabola de la Hechicera    | 2                                              | -20.1        | 0.2                       | -20.2        | 0.2                                                | 2  | -14.9     | 0.3      | -14.3                                | 0.2      | 5.2 | 5.9 |
|                                                                                                                                                                                                                                                     | Longar                     | 4                                              | -19.1        | 0.4                       | -19.6        | 0.3                                                | 7  | -13.4     | 1.0      | -12.9                                | 0.5      | 5.7 | 6.7 |
|                                                                                                                                                                                                                                                     | Megalithic graves combined | 13                                             | -19.4        | 0.4                       | -19.6        | 0.3                                                | 16 | -13.6     | 0.9      | -13.0                                | 0.7      | 5.7 | 6.5 |
| Sites combined                                                                                                                                                                                                                                      |                            | 27                                             | -19.5        | 0.4                       | -19.8        | 0.4                                                | 32 | -13.6     | 0.8      | -13.5                                | 0.8      | 5.9 | 6.3 |

\* Mean of dentine collagen carbon isotope values ( $\delta^{13}\text{C}_{\text{dcol}}$ ) corresponding to formation ages of M1 (0-3 years) and M2 crowns (2.5-8 years) (34) (cf. Table S5).

† Composite or pooled standard deviations.

**Table S7. Modern stream and lake water oxygen isotope values ( $\delta^{18}\text{O}_{\text{dw}}$ ) from the Rioja Alavesa region.**

| Sample ID | GPS location (ETRS89 30N) |         |                 | no. measurements | $\delta^{18}\text{O}_{\text{dw}}$ (‰) | $\sigma$ |
|-----------|---------------------------|---------|-----------------|------------------|---------------------------------------|----------|
|           | X                         | Y       | Altitude (masl) |                  |                                       |          |
| 6         | 530768                    | 4713600 | 602             | 2                | -7.9                                  | 0.0      |
| 12        | 539543                    | 4707576 | 386             | 3                | -7.3                                  | 0.2      |
| 13        | 535720                    | 4710228 | 554             | 2                | -1.2                                  | 0.0      |
| 14        | 535084                    | 4711034 | 566             | 2                | -3.0                                  | 0.0      |
| 16        | 536068                    | 4712758 | 535             | 2                | -7.6                                  | 0.0      |
| 18        | 535103                    | 4705821 | 428             | 2                | -5.9                                  | 0.2      |
| 23        | 538586                    | 4715945 | 658             | 3                | -7.9                                  | 0.3      |
| 24        | 534011                    | 4717729 | 844             | 3                | -7.7                                  | 0.3      |
| 25        | 537409                    | 4715251 | 640             | 2                | -7.7                                  | 0.0      |
| 26        | 550018                    | 4713238 | 588             | 2                | -7.7                                  | 0.0      |
| 27        | 550938                    | 4711553 | 528             | 3                | -7.9                                  | 0.1      |
| 28        | 548903                    | 4717763 | 706             | 2                | -7.8                                  | 0.0      |
| 30        | 550734                    | 4707595 | 435             | 2                | -7.2                                  | 0.2      |
| 31        | 539133                    | 4719693 | 679             | 2                | -7.4                                  | 0.1      |
| 32        | 535548                    | 4719118 | 719             | 3                | -8.0                                  | 0.1      |
| 34        | 529237                    | 4719226 | 820             | 3                | -8.4                                  | 0.1      |
| 35        | 523778                    | 4719343 | 779             | 3                | -8.2                                  | 0.2      |
| 36        | 523508                    | 4721626 | 709             | 2                | -7.6                                  | 0.3      |
| 37        | 525829                    | 4720587 | 741             | 3                | -8.3                                  | 0.2      |

**Table S8. Modern plant samples analyzed for the creation of the BASr map of the Rioja Alavesa region and strontium isotope ( $^{87}\text{Sr}/^{86}\text{Sr}$ ) and strontium ([Sr]) and calcium concentration ([Ca]) values obtained from them.**

| Sample | Tree species                   | GPS-location (ETRS89 30N) |         |      | Area                                    | Formation                                                                   | Gen. lithology                     | Age (stage, period)                                        | $^{87}\text{Sr}/^{86}\text{Sr} \pm 2\sigma^*$ | [Sr] (ppm) | [Ca] (ppm) |
|--------|--------------------------------|---------------------------|---------|------|-----------------------------------------|-----------------------------------------------------------------------------|------------------------------------|------------------------------------------------------------|-----------------------------------------------|------------|------------|
|        |                                | X                         | Y       | masl |                                         |                                                                             |                                    |                                                            |                                               |            |            |
| 70T1   | Holm oak ( <i>Q. ilex</i> )    | 535689                    | 4710267 | 557  | Rioja Alavesa lowlands, salt lake shore | 01a – Clay, lime, sand and gravel. Alluvial. Floodplain                     | All/Coll soils. Clay, sand, gravel | Holocene                                                   | 0.707815 $\pm$ 5                              | 405        | 15100      |
| 80T1   | Holm oak ( <i>Q. ilex</i> )    | 535081                    | 4711035 | 568  | Rioja Alavesa lowlands, salt lake shore | 01a – Clay, lime, sand and gravel. Alluvial. Floodplain                     | All/Coll soils. Clay, sand, gravel | Holocene                                                   | 0.707884 $\pm$ 7                              | 133        | 3668       |
| 5T1a   | Holm oak ( <i>Q. ilex</i> )    | 538152                    | 4705830 | 422  | Rioja Alavesa lowlands                  | 01a – Clay, lime, sand and gravel. Alluvial. Floodplain                     | All/Coll soils. Clay, sand, gravel | Holocene                                                   | 0.707905 $\pm$ 14                             | 318        | 9440       |
| 5T1b   | Holm oak ( <i>Q. ilex</i> )    | 538152                    | 4705830 | 422  | Rioja Alavesa lowlands                  | 01a – Clay, lime, sand and gravel. Alluvial. Floodplain                     | All/Coll soils. Clay, sand, gravel | Holocene                                                   | 0.707885 $\pm$ 7                              | -          | -          |
| 3T2a   | Holm oak ( <i>Q. ilex</i> )    | 549773                    | 4714089 | 711  | Rioja Alavesa lowlands                  | 01b – Alternating beds of calcareous sandstone, limolites and red argilites | Sandstone                          | Ramblian – Middle Aragonian (Miocene)                      | 0.707801 $\pm$ 16                             | -          | -          |
| 3T2b   | Holm oak ( <i>Q. ilex</i> )    | 549773                    | 4714089 | 711  | Rioja Alavesa lowlands                  | 01b – Alternating beds of calcareous sandstone, limolites and red argilites | Sandstone                          | Ramblian – Middle Aragonian (Miocene)                      | 0.707808 $\pm$ 8                              | -          | -          |
| 5T2    | Holm oak ( <i>Q. ilex</i> )    | 538130                    | 4705824 | 419  | Rioja Alavesa lowlands                  | 01b – Alternating beds of calcareous sandstone, limolites and red argilites | Sandstone                          | Ramblian – Middle Aragonian (Miocene)                      | 0.707896 $\pm$ 16                             | 191        | 9231       |
| 0T1    | Holm oak ( <i>Q. ilex</i> )    | 522651                    | 4714209 | 611  | Rioja Alavesa lowlands                  | 01b – Alternating beds of calcareous sandstone, limolites and red argilites | Sandstone                          | Ramblian – Middle Aragonian (Miocene)                      | 0.707994 $\pm$ 13                             | -          | -          |
| 2T1    | Holm oak ( <i>Q. ilex</i> )    | 535668                    | 4713216 | 608  | Rioja Alavesa lowlands                  | 01b – Alternating beds of calcareous sandstone, limolites and red argilites | Sandstone                          | Ramblian – Middle Aragonian (Miocene)                      | 0.708400 $\pm$ 10                             | 18         | 9980       |
| 1T1    | Holm oak ( <i>Q. ilex</i> )    | 538402                    | 4715814 | 682  | Rioja Alavesa lowlands                  | 01b – Alternating beds of calcareous sandstone, limolites and red argilites | Sandstone                          | Ramblian – Middle Aragonian (Miocene)                      | 0.708454 $\pm$ 14                             | 19         | 10239      |
| 39T1   | Holm oak ( <i>Q. ilex</i> )    | 536667                    | 4716570 | 814  | Sierra Cantabria S foothills            | 01b – Alternating beds of calcareous sandstone, limolites and red argilites | Sandstone                          | Ramblian – Middle Aragonian (Miocene)                      | 0.708492 $\pm$ 13                             | 6          | 10018      |
| 43T2   | Gall-oak ( <i>Q. faginea</i> ) | 525432                    | 4723835 | 689  | N lower mountains                       | 02a – Conglomerates. Red argilites and loam                                 | Conglomerates, loam                | Rupelian – Chattian (Oligocene)                            | 0.708161 $\pm$ 7                              | 11         | 7584       |
| 52T2   | Holm oak ( <i>Q. ilex</i> )    | 550731                    | 4717800 | 638  | Sierra Cantabria S foothills            | 02b – Conglomerates. Loam and nodular chalk                                 | Conglomerates, loam                | Rupelian (Oligocene)                                       | 0.708695 $\pm$ 9                              | 115        | 12627      |
| 11T2   | Gall-oak ( <i>Q. faginea</i> ) | 522325                    | 4720162 | 755  | Sierra Cantabria N foothills            | 04 – Oolitic and bioclastic limestone, 'carniolas' and laminated dolomites  | Limestone                          | Rhaetian (Upper Triassic) – Pliensbachian (Lower Jurassic) | 0.709975 $\pm$ 11                             | 11         | 9910       |

|      |                                      |        |         |      |                              |                                                                                                              |               |                                                           |              |    |       |
|------|--------------------------------------|--------|---------|------|------------------------------|--------------------------------------------------------------------------------------------------------------|---------------|-----------------------------------------------------------|--------------|----|-------|
| 50T1 | Downy oak<br>( <i>Q. pubescens</i> ) | 530439 | 4719973 | 869  | Sierra Cantabria N foothills | 06 – White calcarenite and dolomite limestone                                                                | Limestone     | Turonian – Santonian (Upper Cretaceous)                   | 0.710006 ±7  | 3  | 7047  |
| 7T1  | Holm oak<br>( <i>Q. ilex</i> )       | 541759 | 4719326 | 763  | Sierra Cantabria N foothills | 07a – Sand, sandstone and conglomerate beds (Utrillas formation)                                             | Sand          | Albian (Lower Cretaceous) – Cenomanian (Upper Cretaceous) | 0.710133 ±9  | 15 | 13924 |
| 8T1  | Oak<br>( <i>Q. robur</i> )           | 523781 | 4719645 | 777  | Sierra Cantabria N foothills | 07a – Sand, sandstone and conglomerate beds (Utrillas formation)                                             | Sand          | Albian (Lower Cretaceous) – Cenomanian (Upper Cretaceous) | 0.712172 ±13 | 4  | 6925  |
| 61T1 | Oak<br>( <i>Q. robur</i> )           | 525996 | 4715929 | 1126 | Sierra Cantabria top         | 07b – Sand, sandy loam, limestone, Prealveoline and orbitoline calcarenite and dolomites (Dosante formation) | Sand          | Cenomanian (Upper Cretaceous)                             | 0.710776 ±10 | 13 | 3466  |
| 49T1 | Downy oak<br>( <i>Q. pubescens</i> ) | 528552 | 4722636 | 763  | N lower mountains            | 08a – Sandy limestone, calcarenite and sandy loam                                                            | Limestone     | Campanian – Maastrichtian (Upper Cretaceous)              | 0.709388 ±7  | 8  | 9464  |
| 10T1 | Gall-oak<br>( <i>Q. faginea</i> )    | 524743 | 4720625 | 739  | Sierra Cantabria N foothills | 08b – Alternating sandy loam and sandy limestone centimetric/decimetric beds (Montes de Vitoria formation)   | Sand          | Campanian – Maastrichtian (Upper Cretaceous)              | 0.710141 ±10 | 5  | 6403  |
| 40T1 | Oak<br>( <i>Q. robur</i> )           | 539719 | 4717921 | 910  | Sierra Cantabria S foothills | 17 – Conglomerates. Lutites and sandstone                                                                    | Conglomerates | Chattian (Oligocene) – Ramblian (Miocene)                 | 0.708829 ±9  | 4  | 6042  |
| 28T1 | Downy oak<br>( <i>Q. pubescens</i> ) | 526940 | 4722929 | 827  | N lower mountains            | 18a – Limestone, massive dolomite sandstone and loam. Dolomites (Salarons formation)                         | Limestone     | Danian (Paleocene)                                        | 0.708893 ±10 | 7  | 14822 |
| 59T1 | Holm oak<br>( <i>Q. ilex</i> )       | 519184 | 4722161 | 625  | N lower mountains            | 18b – Limestone, massive dolomite sandstone and loam. Sandy limestone, sandstone and sandy loam              | Limestone     | Santonian – Maastrichtian (Upper Cretaceous)              | 0.709048 ±8  | 6  | 8286  |

\* Each  $^{87}\text{Sr}/^{86}\text{Sr}$  value is reported with a  $2\sigma$  error (absolute error value of the individual sample analysis – internal error, reported as times  $10^6$ ).

| <b>Table S9. BASr (<math>^{87}\text{Sr}/^{86}\text{Sr} \pm 1 \text{ SD}</math>) for the local area (“local BASr”) and the average BASr values calculated for 15-, 30-, 60-, and 120-min walking distance catchments.</b> |                         |                        |                            |                            |                            |                            |
|--------------------------------------------------------------------------------------------------------------------------------------------------------------------------------------------------------------------------|-------------------------|------------------------|----------------------------|----------------------------|----------------------------|----------------------------|
| Burial location                                                                                                                                                                                                          | Site                    | Local BASr             | 15min BASr*                | 30min BASr*                | 60min BASr*                | 120min BASr*               |
| Funerary cave                                                                                                                                                                                                            | Las Yurdinas II         | 0.7104<br>$\pm 0.0003$ | 0.7096<br>$\pm 0.0008$ (3) | 0.7094<br>$\pm 0.0008$ (3) | 0.7093<br>$\pm 0.0008$ (4) | 0.7089<br>$\pm 0.0007$ (5) |
|                                                                                                                                                                                                                          | Los Husos I             | 0.7081<br>$\pm 0.0003$ | 0.7081<br>$\pm 0.0003$ (1) | 0.7081<br>$\pm 0.0003$ (2) | 0.7082<br>$\pm 0.0004$ (4) | 0.7083<br>$\pm 0.0005$ (5) |
|                                                                                                                                                                                                                          | Peña Larga              | 0.7086<br>$\pm 0.0003$ | 0.7085<br>$\pm 0.0006$ (4) | 0.7085<br>$\pm 0.0006$ (5) | 0.7084<br>$\pm 0.0006$ (5) | 0.7085<br>$\pm 0.0006$ (5) |
| Megalithic grave                                                                                                                                                                                                         | Alto de la Huesera      | 0.7081<br>$\pm 0.0003$ | 0.7081<br>$\pm 0.0003$ (1) | 0.7081<br>$\pm 0.0003$ (2) | 0.7081<br>$\pm 0.0003$ (3) | 0.7081<br>$\pm 0.0003$ (5) |
|                                                                                                                                                                                                                          | Chabola de la Hechicera | 0.7081<br>$\pm 0.0003$ | 0.7081<br>$\pm 0.0003$ (1) | 0.7081<br>$\pm 0.0003$ (1) | 0.7081<br>$\pm 0.0003$ (3) | 0.7081<br>$\pm 0.0003$ (5) |
|                                                                                                                                                                                                                          | Longar                  | 0.7081<br>$\pm 0.0003$ | 0.7082<br>$\pm 0.0003$ (2) | 0.7082<br>$\pm 0.0003$ (3) | 0.7083<br>$\pm 0.0003$ (3) | 0.7083<br>$\pm 0.0003$ (5) |

\* Values between round brackets represent the number of different geological formations included in the calculation of the average BASr.



**Table S10. Correspondence between the enamel apatite strontium isotope values ( $^{87}\text{Sr}/^{86}\text{Sr}$ ) of the 32 individuals analyzed and the average BASr values calculated for the 0- to 60-min, 60- to 120-min, and >120-min walking areas from their respective burial locations.**

| Burial location  | Site                    | Individual | Walking time (min) |        |      |
|------------------|-------------------------|------------|--------------------|--------|------|
|                  |                         |            | 0-60               | 60-120 | >120 |
| Funerary cave    | Las Yurdinas II         | LYII25     |                    |        |      |
|                  |                         | LYII26     |                    |        |      |
|                  |                         | LYII27     |                    |        |      |
|                  |                         | LYII29     |                    |        |      |
|                  |                         | LYII30     |                    |        |      |
|                  |                         | LYII34     |                    |        |      |
|                  |                         | LYII40     |                    |        |      |
|                  |                         | LYII41     |                    |        |      |
|                  |                         | LYII42     |                    |        |      |
|                  |                         | LYII43     |                    |        |      |
|                  | LYII56                  |            |                    |        |      |
|                  | Los Husos I             | LHI57      |                    |        |      |
|                  |                         | LHI58      |                    |        |      |
|                  |                         | LHI62      |                    |        |      |
|                  | Peña Larga              | CPL2       |                    |        |      |
| CPL5             |                         |            |                    |        |      |
| Megalithic grave | Alto de la Huesera      | LHUE34     |                    |        |      |
|                  |                         | LHUE36     |                    |        |      |
|                  |                         | LHUE52     |                    |        |      |
|                  |                         | LHUE53     |                    |        |      |
|                  |                         | LHUE2i     |                    |        |      |
|                  |                         | LHUE17c    |                    |        |      |
|                  | Chabola de la Hechicera | LHUE19c    |                    |        |      |
|                  |                         | CH94       |                    |        |      |
|                  | Longar                  | CH96       |                    |        |      |
|                  |                         | LON5       |                    |        |      |
|                  |                         | LON30      |                    |        |      |
|                  |                         | LON31      |                    |        |      |
|                  |                         | LON34      |                    |        |      |
| LON38            |                         |            |                    |        |      |
| LON41            |                         |            |                    |        |      |
| LON43            |                         |            |                    |        |      |

| Table S11. Strontium isotope ( $^{87}\text{Sr}/^{86}\text{Sr}$ ) and strontium ([Sr]) and calcium concentration ([Ca]) values of salt and both spring and surface salt waters from the Rioja Alavesa region. |                            |                           |         |      |                                                     |                                               |            |            |
|--------------------------------------------------------------------------------------------------------------------------------------------------------------------------------------------------------------|----------------------------|---------------------------|---------|------|-----------------------------------------------------|-----------------------------------------------|------------|------------|
| Sample                                                                                                                                                                                                       | Type                       | GPS-location (ETRS89 30N) |         |      | Area                                                | $^{87}\text{Sr}/^{86}\text{Sr} \pm 2\sigma^*$ | [Sr] (ppm) | [Ca] (ppm) |
|                                                                                                                                                                                                              |                            | X                         | Y       | masl |                                                     |                                               |            |            |
| Añana_S                                                                                                                                                                                                      | Salt                       | 501156                    | 4738241 | 597  | Alava western valleys (ca. 30km from Rioja Alavesa) | $0.708193 \pm 6$                              | 45         | 3993       |
| Buradón_S                                                                                                                                                                                                    | Salt                       | 513877                    | 4720055 | 500  | Sierra Cantabria N foothills                        | $0.708207 \pm 8$                              | 3          | 327        |
| Añana_W                                                                                                                                                                                                      | Spring salt water          | 501156                    | 4738241 | 597  | Alava western valleys (ca. 30km from Rioja Alavesa) | $0.708170 \pm 5$                              | 26         | 1678       |
| Buradón_W                                                                                                                                                                                                    | Spring salt water          | 513877                    | 4720055 | 500  | Sierra Cantabria N foothills                        | $0.708258 \pm 6$                              | 25         | 1180       |
| Carralagroño_W                                                                                                                                                                                               | Surface salt water (lake)  | 535689                    | 4710267 | 557  | Rioja Alavesa lowlands                              | $0.707820 \pm 6$                              | 21         | 512        |
| Prado_W                                                                                                                                                                                                      | Surface fresh water (lake) | 535081                    | 4711035 | 568  | Rioja Alavesa lowlands                              | $0.707855 \pm 5$                              | 3          | 76         |

\* Each  $^{87}\text{Sr}/^{86}\text{Sr}$  value is reported with a  $2\sigma$  error (absolute error value of the individual sample analysis – internal error, reported as times  $10^6$ ).
